# Supplementary material for: Heterogeneity of the efficacy of the 23-valent pneumococcal polysaccharide vaccine caused by various underlying conditions of chronic pulmonary disease in older patients: prospective cohort study
Source: PubMed Central journal article supplement — BMJ Open. 2011 Jul 18;1(1):e000105. doi: 10.1136/bmjopen-2011-000105 (PMC3191416; doi:10.1136/bmjopen-2011-000105), 2011-07-18
Supplement: bmjopen-2011-000105.draft_revisions.pdf [file bmjopen-2011-000105.draft_revisions.pdf]

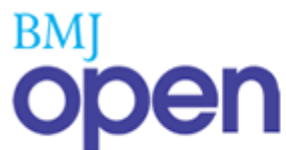

**Heterogeneity of the efficacy of the 23-valent pneumococcal polysaccharide vaccine caused by various underlying conditions of chronic pulmonary disease in elderly patients**

|                               |                                                                                                                                                                                                                                                                            |
|-------------------------------|----------------------------------------------------------------------------------------------------------------------------------------------------------------------------------------------------------------------------------------------------------------------------|
| Journal:                      | <i>BMJ Open</i>                                                                                                                                                                                                                                                            |
| Manuscript ID:                | bmjopen-2011-000105                                                                                                                                                                                                                                                        |
| Article Type:                 | Research                                                                                                                                                                                                                                                                   |
| Date Submitted by the Author: | 23-Feb-2011                                                                                                                                                                                                                                                                |
| Complete List of Authors:     | Inoue, Satoshi; Yokohama City University, Department of Epidemiology and Public Health<br>Watanuki, Yuji<br>Kaneko, Tetsuji<br>Sato, Takashi<br>Miyazawa, Naoki<br>Kaneko, Takeshi<br>Ishigatsubo, Yoshiaki<br>Morita, Satoshi<br>Natsumeda, Yutaka<br>Mizushima, Shunsaku |
| <b>Subject Heading</b>:       | Infectious diseases                                                                                                                                                                                                                                                        |
| Keywords:                     | Infection control < INFECTIOUS DISEASES, Respiratory infections < THORACIC MEDICINE, Adult thoracic medicine < THORACIC MEDICINE                                                                                                                                           |
|                               |                                                                                                                                                                                                                                                                            |

SCHOLARONE™  
Manuscripts

1  
2  
3  
4  
5  
6 **Heterogeneity of the efficacy of the 23-valent pneumococcal polysaccharide vaccine**  
7  
8 **caused by various underlying conditions of chronic pulmonary disease in elderly**  
9  
10 **patients**

11  
12 Satoshi Inoue,<sup>1,5</sup> Yuji Watanuki,<sup>2</sup> Tetsuji Kaneko,<sup>3</sup> Takashi Sato,<sup>2</sup> Naoki Miyazawa,<sup>2</sup>  
13  
14 Takeshi Kaneko,<sup>4</sup> Yoshiaki Ishigatsubo,<sup>2</sup> Satoshi Morita,<sup>3</sup> Yutaka Natsumeda,<sup>5</sup> Shunsaku  
15  
16 Mizushima,<sup>1</sup>

17  
18  
19  
20  
21  
22 <sup>1</sup>Department of Epidemiology and Public Health, Yokohama City University Graduate  
23  
24 School of Medicine, 3-9 Fukuura, Kanazawa-ku Yokohama 236-0004 Japan

25  
26  
27 <sup>2</sup>Department of Internal Medicine and Clinical Immunology, Yokohama City University  
28  
29 Graduate School of Medicine, Yokohama, Japan

30  
31  
32 <sup>3</sup>Department of Biostatistics and Epidemiology, Yokohama City University Graduate  
33  
34 School of Medicine, Yokohama, Japan

35  
36  
37 <sup>4</sup>Department of Pulmonary Medicine, Yokohama City University Graduate School of  
38  
39 Medicine, Yokohama, Japan

40  
41  
42 <sup>5</sup>Department of Clinical Research, Yokohama City University Graduate School of  
43  
44 Medicine, Yokohama, Japan

45  
46  
47  
48 Corresponding author:

49  
50  
51 Satoshi Inoue, MD, PhD

52  
53  
54 Tel: 81-45-787-2610

55  
56  
57 Fax: 81-45-787-2609

58  
59  
60 E-mail: [ino999@yokohama-cu.ac.jp](mailto:ino999@yokohama-cu.ac.jp)

1  
2  
3  
4  
5  
6 Key word: PPV23, chronic pulmonary disease, elderly patient, respiratory infection  
7

8 Word count: 2806  
9  
10  
11  
12  
13  
14  
15  
16  
17  
18  
19  
20  
21  
22  
23  
24  
25  
26  
27  
28  
29  
30  
31  
32  
33  
34  
35  
36  
37  
38  
39  
40  
41  
42  
43  
44  
45  
46  
47  
48  
49  
50  
51  
52  
53  
54  
55  
56  
57  
58  
59  
60

For peer review only

## ABSTRACT

### Objective

To determine the ideal conditions for use of the 23-valent pneumococcal polysaccharide vaccine (PPV23) in elderly outpatients with chronic pulmonary diseases.

### Design

Prospective cohort study

### Participants

A total of 1,378 outpatients with chronic pulmonary diseases  $\geq 60$  years of age

### Intervention

Participants were educated about PPV23, and those who responded affirmatively were vaccinated between August and November 2002. The participants who chose no intervention served as controls. The pre-vaccine period was defined as August 2001 to August 2002. Participants were followed from December 2002 to the end of study in November 2004 (for 2 years) or until death.

### Main outcome measures

Events of interest included the first episode of bacterial (including pneumococcal) pulmonary infection and death of any cause.

### Results

Frequent episodes of pulmonary infection during the pre-vaccine period significantly increased the event rate during the 2-year observation period ( $p < 0.001$ ). Chronic respiratory failure was associated with an increased number of events only when the pulmonary infection episode did not occur in the pre-vaccine period ( $p < 0.001$ ). No significant differences in survival probability were observed between the vaccinated and unvaccinated group during analysis of the entire cohort. In the Cox proportional hazards

1  
2  
3  
4  
5  
6 regression model, the event rate increased significantly when pulmonary infection  
7  
8 occurred in the pre-vaccine period or when a patient had chronic respiratory failure. In  
9  
10 the subgroup analysis, PPV23 significantly reduced event rates only in patients with  
11  
12 chronic respiratory failure who had no episodes of pulmonary infection during the  
13  
14 pre-vaccine period ( $p = 0.019$ ).

### 17 **Conclusion**

18  
19 The efficacy of PPV23 against pulmonary infection and death of any cause might be  
20  
21 unachievable if pulmonary infection occurs during the pre-vaccine period. PPV23 needs  
22  
23 to be given to elderly patients with chronic pulmonary disease at an earlier time in  
24  
25 which infectious complications in the lung have not yet occurred.  
26  
27  
28  
29  
30  
31

### 32 **Summary**

#### 33 ● Article focus (hypothesis):

34  
35 The efficacy of PPV23 might be compromised by an episode of pulmonary infection in  
36  
37 the pre-vaccine period or chronic respiratory failure in elderly patients with chronic  
38  
39 pulmonary disease.  
40  
41  
42

#### 43 ● Key messages:

- 44  
45 1. The PPV23 efficacy might be unachievable if pulmonary infection occurs during the  
46  
47 pre-vaccine period.  
48  
49
- 50  
51 2. The event rate could be reduced by PPV23 in patients with noninfectious  
52  
53 complications such as chronic respiratory failure.  
54  
55
- 56  
57 3. Elderly patients with chronic pulmonary disease need to receive the PPV23  
58  
59 vaccination at an earlier time in which infectious complications in the lung have not yet  
60  
occurred.

● Strengths and limitations of this study:

1. Only participants who responded affirmatively received PPV23. They were not assigned randomly to a group.
2. The diagnosis of pulmonary disease was not made in the majority of patients who had pulmonary infection during the study period. The microbiological diagnosis in the lower respiratory tract, which is not normally sterile, is ambiguous.

## INTRODUCTION

*Streptococcus pneumoniae* continues to be one of the main causative pathogens in community-acquired pneumonia and meningitis.[1-2] Due to the high mortality rate of *S. pneumoniae* infections, especially in elderly and very young patients, prophylactic use of 23-valent pneumococcal polysaccharide vaccine (PPV23) is recommended for people at an increased risk of pneumococcal disease in developed countries.[3-7] The efficacy of PPV23, however, remains controversial. Despite the fact that the results of pre- and post-licensed trials in immunocompetent people were supportive of regulatory approval of vaccine use, clinical studies in elderly or young adults with comorbidities in developed countries produced little convincing evidence of effectiveness against a common manifestation of pneumococcal infections such as pneumonia.[8-10] A retrospective study conducted in 1999 suggested that PPV23 was associated with significant reductions in hospitalisation and mortality rates of elderly patients with chronic lung disease and contributed to medical care cost savings, although meta-analytical reviews published thereafter failed to show statistically significant evidence of the protective effects of PPV23 against the development of pneumonia in elderly patients with chronic illnesses.[11-13]

1  
2  
3  
4  
5  
6 We previously reported a 2-year cohort clinical study of elderly outpatients with  
7  
8 chronic pulmonary disease to investigate the prophylactic effects of PPV23 on bacterial  
9  
10 and pneumococcal pulmonary infection onset and outcome.[14] Analysis of the  
11  
12 comparison between the vaccinated and unvaccinated group showed a decline in the  
13  
14 incidence of bacterial pulmonary infection only in the vaccinated group. This result  
15  
16 might be associated with PPV23 effectiveness, although detailed background  
17  
18 information regarding underlying pulmonary conditions was not provided. Subgroup  
19  
20 analysis needs to be carried out since chronic pulmonary disease includes various  
21  
22 clinical and pathophysiological pictures. Underlying pulmonary diseases could cause  
23  
24 chronic respiratory failure if repeatedly complicated by lung infections, and such  
25  
26 heterogeneity may generate different outcomes after vaccination.[15] We decided to  
27  
28 reanalyse the data to study the influence of clinical background during the pre-vaccine  
29  
30 period on PPV23 efficacy in elderly patients with chronic pulmonary disease.  
31  
32  
33  
34  
35  
36  
37

## 38 **METHODS**

### 39 **Study population**

40  
41 A total of 1,378 outpatients  $\geq 60$  years of age (data at the start of the study) with chronic  
42  
43 pulmonary disease in the Kanagawa Cardiovascular and Respiratory Diseases Centre  
44  
45 were informed of the prophylactic effects of PPV23 on infectious pulmonary  
46  
47 exacerbations. Chronic pulmonary diseases in this study included bronchial asthma,  
48  
49 chronic pulmonary emphysema, old tuberculosis, chronic bronchitis, bronchiectasis,  
50  
51 nontuberculous mycobacteria, and others (Table 1). Home oxygen therapy (HOT) had  
52  
53 been prescribed according to the Japanese Respiratory Society (JRS) Guidelines for 97  
54  
55 participants with chronic respiratory failure upon study initiation (Table 1), but no  
56  
57  
58  
59  
60

1  
2  
3  
4  
5  
6 patients were newly prescribed HOT during the observation period.  
7  
8  
9

### 10 **Study design**

11  
12 We did not adopt a randomised controlled study design since the PPV23 vaccination is  
13 considered a part of standard care in many developed countries. Additionally, some  
14 elderly participants with chronic pulmonary disease were in an immunocompromised  
15 status; therefore, a randomised controlled study of vaccine effectiveness may violate  
16 ethical principles and human rights. Written informed consent forms were obtained from  
17 all participants. To avoid selection bias, doctors and other medical staffs were not  
18 allowed to assign patients to the vaccine or non-vaccine group; instead, individual  
19 patients decided whether or not to be vaccinated. A total of 647 patients were injected  
20 with PPV23 (Pneumovax, Merck, NJ, USA) intramuscularly into their non-dominant  
21 upper arm with between August and November 2002.  
22  
23  
24  
25  
26  
27  
28  
29  
30  
31  
32  
33  
34  
35  
36  
37  
38

### 39 **Data collection**

40  
41 Participants were followed from December 2002 to the end of the study in November  
42 2004 (for 2 years) or until death in the clinic approximately every 2 months as long as  
43 clinical status remained stable. A diagnosis of pulmonary infection was made by  
44 respiratory physicians according to the Japanese Respiratory Society Guidelines for the  
45 Management of Community-Acquired Pneumonia in Adults. In brief, patients were  
46 diagnosed with an infectious lung complication when they presented with fever  
47 ( $\geq 38$  °C), cough, yellow sputum, or chest pain and blood testing revealed marked  
48 inflammatory responses such as elevated levels of neutrophils and serum C-reactive  
49 protein. Chest radiography was performed when an infective inflammatory process in  
50  
51  
52  
53  
54  
55  
56  
57  
58  
59  
60



1  
2  
3  
4  
5  
6 the lung was suspected to distinguish pneumonia from acute bronchitis or infectious  
7  
8 exacerbation of chronic bronchitis. In addition to a urinary pneumococcal antigen test,  
9  
10 Gram staining and sputum culture were conducted when a diagnosis of bacterial  
11  
12 pulmonary infection was made to determine the causative microorganisms and the  
13  
14 pattern of antibiotic susceptibility. Empirical antibiotic therapy was started promptly  
15  
16 after diagnosis of infection in the lung was made. The initial treatment was replaced by  
17  
18 second-line therapy of antibiotics chosen according to the sensitivity results.  
19  
20  
21  
22  
23

### 24 **Event of interest**

25  
26 We hypothesised that repeated pulmonary infection and concomitant gradual loss of  
27  
28 lung function might be related to a reduced PPV23 efficacy. Participants were grouped  
29  
30 based on these factors: frequency of infectious (including pneumococcal) pulmonary  
31  
32 infection episode within 1 year prior to the PPV23 vaccination (0 episodes, 1 episode,  
33  
34 and >1 episode), and chronic respiratory failure represented by HOT usage. Events of  
35  
36 interest included the first episode of bacterial or pneumococcal pulmonary infection  
37  
38 (pneumonia, acute bronchitis, or exacerbation of chronic bronchitis) where antibiotic  
39  
40 treatment was required, and death of any cause. The case of death with missing values  
41  
42 was not counted as an event of interest but was included in the mortality rate.  
43  
44  
45  
46  
47  
48  
49

### 50 **Statistical analysis**

51  
52 Differences in event rates were depicted with Kaplan-Meier curves, and the log-rank  
53  
54 test was applied for analysis. Cross-tabulated data were compared by the Wilcoxon test  
55  
56 or the Pearson's chi-square test. Relative risks for the events were estimated using the  
57  
58 Cox proportional hazards regression model. The PASW statistics 18 (SPSS Inc. IL,  
59  
60

1  
2  
3  
4  
5  
6 USA) and SAS software (SAS Institute Inc. NC, USA) were used for the statistical  
7  
8 analysis.  
9

## 10 11 12 13 **RESULTS**

14  
15 A total of 1,378 patients  $\geq 60$  years old with chronic pulmonary disease were enrolled in  
16  
17 this study between August and November 2002. The pre-vaccine period was defined as  
18  
19 1 year prior to PPV23 vaccination (August 2001 to August 2002). Patient characteristics  
20  
21 are shown in Table 1. In the group without pulmonary infection during the pre-vaccine  
22  
23 period, significant reductions in vaccination rate, age, and frequency of chronic  
24  
25 respiratory failure were observed compared with the other 2 groups with at least 1  
26  
27 episode of infectious lung complications. No significant gender difference was seen  
28  
29 among groups.  
30  
31  
32

33  
34 The effects of underlying pulmonary conditions on event occurrences were analysed  
35  
36 before PPV23 effectiveness were evaluated. The survival rate in the Kaplan-Meier  
37  
38 method dropped significantly as the frequency of pulmonary infection in the  
39  
40 pre-vaccine period increased (Figure 1). Chronic respiratory failure was associated with  
41  
42 a significant event rate increase only in the absence of pulmonary infection in the  
43  
44 pre-vaccine period (Table 2). A higher mortality rate was seen in patients with  
45  
46 pulmonary infection during the pre-vaccine period and in chronic pulmonary failure ( $p$   
47  
48  $< 0.001$ ).  
49  
50  
51

52  
53 Participants were not randomly assigned to groups; vaccination was chosen or  
54  
55 declined by each individual. As a result, the number of vaccinated patients was  
56  
57 significantly higher than the number of unvaccinated patients when pulmonary infection  
58  
59 occurred during the pre-vaccine period (Table 1). No significant PPV23 effectiveness  
60

1  
2  
3  
4  
5  
6 was seen between the vaccinated and unvaccinated group in the Kaplan-Meier method  
7  
8 (log rank test,  $p = 0.391$ ). The mortality rate was, however, significantly high in the  
9  
10 vaccinated group (log-rank test,  $p = 0.008$ ). This result may be misleading due to the  
11  
12 vaccination imbalance among groups. The Cox proportional hazards regression model  
13  
14 applied for covariate adjustment showed that the episodes of pulmonary infection and  
15  
16 chronic respiratory failure in the pre-vaccine period were associated with an increased  
17  
18 risk of pulmonary infection and death after PPV23 vaccination (Table 3). No significant  
19  
20 effects of PPV23 on mortality rate were observed (Table 3). These results suggested the  
21  
22 following: PPV23 efficacy might be compromised by some factors such as pulmonary  
23  
24 infection in the pre-vaccine period or chronic respiratory failure; and imbalance of  
25  
26 PPV23 distribution among the groups may be associated with an increased mortality  
27  
28 rate in the vaccinated group.  
29  
30  
31  
32  
33

34 A subgroup analysis was performed to find the ideal condition for PPV23 use in  
35  
36 elderly patients with chronic pulmonary disease. There are no significant differences  
37  
38 between vaccinated and unvaccinated patients when grouped only by frequency of  
39  
40 pulmonary infection in the pre-vaccine period (not shown). The event rate was  
41  
42 somewhat reduced when patients with chronic respiratory failure were vaccinated ( $p =$   
43  
44  $0.071$ ). This effectiveness became significant when patients who had an episode of  
45  
46 pulmonary infection in the pre-vaccine period were excluded (Figure 2). Of note, the  
47  
48 final event-free survival rate was 0.755, which was close to the levels observed in  
49  
50 patients who had not had an episode of pulmonary infection and chronic respiratory  
51  
52 failure during the pre-vaccine period (Table 4). These results suggest that PPV23 might  
53  
54 provide beneficial effects in elderly patients with chronic respiratory failure if episodes  
55  
56 of pulmonary infection during the pre-vaccine period did not occur.  
57  
58  
59  
60

1  
2  
3  
4  
5  
6 There were only 29 pneumococcal events during the observation period  
7  
8 (pneumococcal pulmonary infection, 22; death, 7). The probability of pneumococcal  
9  
10 events increased significantly in the presence of pulmonary infection during the  
11  
12 pre-vaccine period (log-rank test,  $p < 0.001$ ). No effects of chronic respiratory failure on  
13  
14 survival rate were observed. PPV23 vaccination did not show significant protective  
15  
16 effects against the development of pneumococcal events even after subgroup analysis  
17  
18 (data not shown).  
19  
20  
21  
22  
23

## 24 **DISCUSSION**

25  
26 The effects of the PPV23 vaccination on elderly patients with chronic pulmonary  
27  
28 disease varied in accordance with the frequency of lung infection episodes and the  
29  
30 presence of chronic respiratory failure during the pre-vaccine period. Our findings  
31  
32 suggest the following: PPV23 vaccination might work effectively unless previous lung  
33  
34 infection episodes had occurred; and subgroup analysis of the underlying disease  
35  
36 associated with pneumococcal complications might be useful for finding the possible  
37  
38 ideal conditions for PPV23 use. To our knowledge, this is the first report to characterise  
39  
40 PPV23 effectiveness due to the heterogeneity of underlying lung conditions such as the  
41  
42 presence of pulmonary infection episodes prior to vaccination or chronic pulmonary  
43  
44 failure in elderly patients with chronic pulmonary disease.  
45  
46  
47  
48  
49  
50  
51  
52

### 53 **Comparison with other studies**

54  
55 Previous pulmonary infection was highly associated with poor clinical prognosis. This  
56  
57 finding suggests that beneficial PPV23 effectiveness might be unachievable for elderly  
58  
59 people with chronic pulmonary disease in the presence of infectious complications  
60

1  
2  
3  
4  
5  
6 during the pre-vaccine period. In a multicentre double-blind controlled study conducted  
7  
8 in Sweden, PPV23 was not efficacious against overall pneumonia in middle or elderly  
9  
10 non-immunocompromised individuals who had been treated for community-acquired  
11  
12 pneumonia.[16] In that study, the survival rate calculated by the Kaplan-Meier method  
13  
14 was still >80% in both vaccinated and unvaccinated populations after 2-year  
15  
16 observation, while our results showed that the survival rate was <60% if episodes of  
17  
18 pulmonary infection had occurred within 1 year prior to vaccination. These results are  
19  
20 consistent with previous suggestions that chronic pulmonary disease such as chronic  
21  
22 obstructive pulmonary disease (COPD) is a risk factor for repeated pneumonia and that  
23  
24 protective effects of PPV23 could not be obtained.[17-19] Conflicting results were  
25  
26 shown in some other reports in which the beneficial effects of PPV23 in patients with  
27  
28 COPD were indicated, although previous episodes of pneumonia prior to vaccination  
29  
30 were not considered and participants were not limited to the elderly.[11, 20] Alfageme et  
31  
32 al showed PPV23 effectiveness in patients <65 years of age with COPD in a randomised  
33  
34 controlled study in 596 patients.[21] These results and our data indicate that PPV23  
35  
36 might be inefficacious on the elderly population with chronic pulmonary disease  
37  
38 especially when complicated by lung infection prior to the vaccination. Despite the  
39  
40 strong evidence of PPV23 efficacy against invasive pneumococcal disease (IPD),  
41  
42 altered immune response, disruption of a physical barrier in the airways due to  
43  
44 progressive chronic pulmonary disease, and repeated pulmonary infection could  
45  
46 compromise the benefits.[1, 22] PPV23 vaccination should be given to patients with  
47  
48 chronic pulmonary disease at an earlier stage in which infectious complications have not  
49  
50 yet occurred.  
51  
52  
53  
54  
55  
56  
57  
58  
59  
60

The probability of survival was significantly increased by PPV23 in the presence of

1  
2  
3  
4  
5  
6 chronic respiratory failure in patients without episodes of pulmonary infection prior to  
7  
8 vaccination. The survival rate was 75.5% when PPV23 was given. Without PPV23,  
9  
10 survival was reduced to 45.0%, almost the same level as that in the case where  
11  
12 infectious lung complications had occurred during the pre-vaccine period. This result  
13  
14 indicates that pulmonary infection or death due to chronic respiratory failure could be  
15  
16 prevented by the PPV23 vaccination. Oxygen therapy and inhalation therapy containing  
17  
18 corticosteroids may be administered in COPD patients when airflow is severe and  
19  
20 chronic respiratory failure is present, but these treatments were suggested to be risk  
21  
22 factors for community-acquired pneumonia.[23-25] Additionally, bacterial colonisation  
23  
24 of the distal airway may occur due to the altered pulmonary defense.<sup>[22]</sup> We suggest that  
25  
26 patients receive the PPV23 vaccination soon after the diagnosis of chronic respiratory  
27  
28 disease such as COPD, especially when maintenance treatments for impaired lung  
29  
30 function are expected to be risk factors for pneumonia. In this study, the number of  
31  
32 participants with chronic respiratory failure who were free of lung infections during the  
33  
34 pre-vaccine period was only 70. Thus, a large scale study is warranted.  
35  
36  
37  
38  
39  
40  
41  
42

### 43 **Strengths and limitations of the study**

44  
45 When informed consents were obtained prior to the study initiation, PPV23 vaccine  
46  
47 recommendations were made and only participants who responded affirmatively  
48  
49 received the vaccination. This method may be associated with these results: the  
50  
51 vaccination rate increased significantly in high-risk patients who had at least 1 episode  
52  
53 of bacterial pulmonary infection during the pre-vaccine period or chronic respiratory  
54  
55 failure; and the mortality rate was higher in vaccinated patients, although the presence  
56  
57 of adverse effects of PPV23 is unlikely because PPV23 had generally been considered  
58  
59  
60

1  
2  
3  
4  
5  
6 safe based on clinical experience since 1977.[7] In the Cox proportional hazards model,  
7  
8 PPV23 was not a risk factor for the events. All of the participants in this study were  
9  
10 elderly patients with chronic pulmonary disease, and all of them could be categorised  
11  
12 into groups for which PPV23 vaccination is recommended in the United States and  
13  
14 some European countries.[3, 7, 12] In Japan, no vaccine recommendations against  
15  
16 pneumococcal infection are issued by the Japanese Ministry of Health, Labor and  
17  
18 Welfare.[26] Japanese participants need to accept some risks for the public benefit and  
19  
20 not for their own if selected for the unvaccinated group. This condition is different from  
21  
22 that in some developed countries where unvaccinated control subjects in clinical trials  
23  
24 of the PPV23 vaccine could still be protected by previous vaccination and indirect  
25  
26 immunity from other people, including children.[27-29] Pneumococcal infection was  
27  
28 associated with increasing mortality rates, while the beneficial effects of PPV23 without  
29  
30 any severe adverse events were suggested in some previous clinical trials.[1, 8, 13,  
31  
32 30-31] Therefore, we decided to conduct a nonrandomised clinical study to ensure that  
33  
34 participants were treated with respect and dignity.  
35  
36  
37  
38  
39

40  
41 The diagnosis of pneumococcal disease was not made in the majority of patients  
42  
43 who had pulmonary infections during the observation period. Identification of *S.*  
44  
45 *pneumoniae* using a sputum Gram stain is required for definitive diagnosis. However,  
46  
47 compared to IPD defined as any condition in which *S. pneumonia* is identified in a  
48  
49 normally sterile body site, microbiological diagnosis in the lower respiratory tract is  
50  
51 ambiguous.[1, 5] It was noted by many authors that respiratory secretion samples for  
52  
53 pneumococcal identification might be unreliable due to the technical difficulties in  
54  
55 obtaining good-quality sputum and in distinguishing causative specimens from  
56  
57 colonisation.[19, 32] The positive results in urine antigen testing might be related to  
58  
59  
60

1  
2  
3  
4  
5  
6 previous infection or colonisation. It might be difficult to assess PPV23 effectiveness on  
7  
8 pneumococcal pulmonary infection using these procedures. Blood cultures are  
9  
10 recommended for patients hospitalised after a diagnosis of community-acquired  
11  
12 pneumonia, although its cost-effectiveness has been questioned in several studies.[33]  
13  
14  
15 Less expensive, novel techniques for accurate diagnosis of pneumonia need to be  
16  
17 developed.  
18  
19  
20  
21

### 22 **Conclusions and policy implications**

23  
24 Our data demonstrated that the beneficial effects of the PPV23 vaccination may not be  
25  
26 obtainable if an episode of pulmonary infection occurred during the pre-vaccine period  
27  
28 in elderly patients with chronic pulmonary disease. We suggest that PPV23 needs to be  
29  
30 given soon after chronic pulmonary disease is diagnosed. In developed countries,  
31  
32 including Japan, elderly populations with chronic pulmonary disease are growing in  
33  
34 number. The Japanese Ministry of Health, Labor and Welfare should introduce the  
35  
36 PPV23 vaccination for patients with chronic pulmonary disease and in routine  
37  
38 vaccination of children along with pneumococcal conjugate vaccine that could provide  
39  
40 indirect beneficial effects to the population in whom PPV23 efficacy may not be  
41  
42 expected.  
43  
44  
45  
46  
47  
48  
49  
50  
51  
52  
53  
54  
55  
56  
57  
58  
59  
60



**Table 1: Baseline characteristics of 1378 outpatients with chronic pulmonary disease**

|                              | Frequency of pulmonary infection during the pre-vaccine period |                |                | P Value <sup>†</sup> |
|------------------------------|----------------------------------------------------------------|----------------|----------------|----------------------|
|                              | 0<br>(n = 1164)                                                | 1<br>(n = 167) | >1<br>(n = 43) |                      |
| Age                          |                                                                |                |                |                      |
| Mean ± SD                    | 71.3 ± 7.0                                                     | 73.3 ± 6.9     | 73.0 ± 7.0     | < 0.001              |
| Median                       | 71                                                             | 73             | 73             |                      |
| Male                         | 626 (53.8%)                                                    | 98 (58.7%)     | 27 (62.8%)     | 0.272                |
| Female                       | 538 (46.2%)                                                    | 69 (41.3%)     | 16 (37.2%)     |                      |
| Chronic respiratory disease* |                                                                |                |                |                      |
| Bronchial asthma             | 517                                                            | 59             | 16             |                      |
| Chronic pulmonary emphysema  | 197                                                            | 40             | 14             |                      |
| Old tuberculosis             | 157                                                            | 33             | 10             |                      |
| Chronic bronchitis           | 106                                                            | 18             | 5              |                      |
| Interstitial pneumonia       | 100                                                            | 9              | 0              |                      |
| Non-tuberculous mycobacteria | 84                                                             | 10             | 2              |                      |
| Bronchioectasis              | 31                                                             | 13             | 5              |                      |
| Others                       | 103                                                            | 15             | 4              |                      |
| PPV23-vaccinated             | 512 (44.0%)                                                    | 109 (65.3%)    | 25 (58.1%)     | < 0.001              |
| PPV23-unvaccinated           | 652 (56.0%)                                                    | 58 (34.7%)     | 18 (41.9%)     |                      |
| Chronic respiratory failure  |                                                                |                |                |                      |
| +                            | 70 (6.0%)                                                      | 20 (12.0%)     | 7 (16.3%)      | < 0.001              |
| -                            | 1094 (94.0%)                                                   | 147 (88.0%)    | 36 (83.7%)     |                      |

\*Some patients were diagnosed as having more than one chronic respiratory disease.

<sup>†</sup>Data was analyzed using the Wilcoxon test or the Pearson's test.

**Table 2: The effects of pulmonary infection and chronic respiratory failure during the pre-vaccine period on the event-free survival rate**

| Frequency of pulmonary infection during the pre-vaccine period | Chronic respiratory failure | Survival rate at the end of the study* | P value* |
|----------------------------------------------------------------|-----------------------------|----------------------------------------|----------|
| 0                                                              | (-)                         | 0.843                                  | <0.001   |
| 0                                                              | (+)                         | 0.689                                  |          |
| 1                                                              | (-)                         | 0.527                                  | 0.506    |
| 1                                                              | (+)                         | 0.450                                  |          |
| >1                                                             | (-)                         | 0.275                                  | 0.348    |
| >1                                                             | (+)                         | 0.143                                  |          |

\*Data was analyzed using the log-rank test.

**Table 3: Association of the frequency of pulmonary infection during the pre-vaccine period, chronic respiratory failure and the PPV23 vaccination with the development of the events or death of any cause**

|                                                          | Hazard ratio | 95% CI        | P Value |
|----------------------------------------------------------|--------------|---------------|---------|
| <b>Covariates for the risk of the events</b>             |              |               |         |
| <b>Pulmonary infection during the pre-vaccine period</b> |              |               |         |
| <b>1 episode</b>                                         | 3.243*       | 2.435 - 4.319 | <0.001  |
| <b>&gt;1 episode</b>                                     | 6.437*       | 4.368 - 9.487 | <0.001  |
| <b>Chronic respiratory failure</b>                       | 1.779        | 1.240 - 2.554 | 0.002   |
| <b>PPV23 vaccination</b>                                 | 0.900        | 0.707 - 1.147 | 0.396   |
| <b>Covariates for the risk of death</b>                  |              |               |         |
| <b>Pulmonary infection during the pre-vaccine period</b> |              |               |         |
| <b>1 episode</b>                                         | 2.393*       | 1.442 - 3.972 | 0.001   |
| <b>&gt;1 episode</b>                                     | 1.866*       | 0.800 - 4.351 | 0.149   |
| <b>Chronic respiratory failure</b>                       | 2.761        | 1.580 - 4.827 | <0.001  |
| <b>PPV23 vaccination</b>                                 | 1.473        | 0.932 - 2.328 | 0.097   |

\*Hazard ratio was estimated in relative to the case of outpatients with no episode of pulmonary infection during the pre-vaccine period.

**Table 4: The influence of pulmonary infection and chronic respiratory failure during the pre-vaccine period on the PPV23 vaccine efficacy**

| Frequency of pulmonary infection during the pre-vaccine period | Chronic respiratory failure | Vaccinated* | Unvaccinated* | P Value <sup>†</sup> |
|----------------------------------------------------------------|-----------------------------|-------------|---------------|----------------------|
| (-)                                                            | (-)                         | 0.846 (465) | 0.836 (629)   | 0.931                |
|                                                                | (+)                         | 0.755 (47)  | 0.450 (23)    | 0.019                |
| 1 episode                                                      | (-)                         | 0.557 (92)  | 0.490 (55)    | 0.665                |
|                                                                | (+)                         | 0.431 (17)  | 0.333 (3)     | 0.876                |
| >1 episode                                                     | (-)                         | 0.317 (22)  | 0.214 (13)    | 0.200                |
|                                                                | (+)                         | 0.000 (3)   | 0.250 (4)     | 0.093                |

\*Data represented the survival rate at the end of the study (2 years after the PPV23 vaccination). Numbers in parenthesis indicate numbers of patients.

<sup>†</sup>Data was analyzed using the log-rank test.

1  
2  
3  
4  
5  
6 **Contributions:** SI analysed the data, and drafted and revised the paper. YW designed  
7  
8 the whole study, and collected the data from the clinical records of the participants. TK  
9  
10 wrote the statistical analysis plan, and analysed the data. TS, NM, TK and YI interpreted  
11  
12 the findings, and revised the draft paper. SM, YN and SM supervised data analysis and  
13  
14 assessment.  
15

16  
17 **Funding:** This research received no specific grants from any funding agencies in the  
18  
19 public, commercial or not-for-profit sectors.  
20  
21

22 **Competing interests:** None declared.  
23

24 **Ethical approval:** Full approval of Institutional Review Board in the Kanagawa  
25  
26 Cardiovascular and Respiratory Diseases Centre was obtained prior to the study  
27  
28 initiation.  
29  
30

31 **Data sharing:** No additional data available.  
32

### 33 **Acknowledgement**

34  
35 The material (clinical data) that had been used for ref. 14 is modified and printed with  
36  
37 the permission of the ©European Respiratory Society.  
38  
39  
40  
41

### 42 **Copyright license statement**

43  
44 The Corresponding Author has the right to grant on behalf of all authors and does grant  
45  
46 on behalf of all authors, an exclusive license (or non-exclusive for UK Crown  
47  
48 Employees) on a worldwide basis to the BMJ Publishing Group Ltd, and its Licensees  
49  
50 to permit this article (if accepted) to be published in BMJ Open and any other BMJ PGL  
51  
52 products and to exploit all subsidiary rights, as set out in our license.”  
53  
54  
55  
56  
57  
58  
59  
60

## References

- 1 Moberley S, Holden J, Tantham DP, et al. Vaccines for preventing pneumococcal infection in adults. *Cochrane Database (Review)* 2008 (1):CD000422.
- 2 Heather E, Hsu MPH, Kathleen A, et al. Effects of pneumococcal conjugate vaccine on pneumococcal meningitis. *N Engl J Med* 2009;360:244-56.
- 3 CDC. Updated recommendations for prevention of invasive pneumococcal disease among adults using the 23-valent pneumococcal polysaccharide vaccine (PPSV23). *Morb Motal Wkly Rep* 2010;59:34.
- 4 Vila-Corcoles A, Ochoa-Gondar O, Guzman JA, et al. Effectiveness of the 23-valent pneumococcal polysaccharide vaccine against invasive pneumococcal disease in people 60 years or older. *BMC Infect Dis* 2010;10:73.
- 5 World Health Organization. 23-valent pneumococcal polysaccharide vaccine WHO position paper. *Wkly Epidemiol Rep* 2008;83:373-84.
- 6 Smith FE, Mann JM. Pneumococcal pneumonia: Experience in a community hospital. *West J Med* 1982;136:1-5.
- 7 CDC. Prevention of pneumococcal disease: recommendations of the advisory committee on immunization practices (ACIP). *Wkly Epidemiol Rep* 1997;46:RR-8.
- 8 Jackson LA, Neuzil KM, Yu O, et al. Effectiveness of pneumococcal polysaccharide vaccine in older adults. *N Engl J Med* 2003;348:1747-55.
- 9 Andrews R, Moberley SA. The controversy of the efficacy of pneumococcal vaccine. *Can Med Assoc J* 2009;180:18-19.
- 10 Fine MJ, Smith MA, Carson CA, et al. Efficacy of pneumococcal vaccination in adults. *Arch Intern Med* 1994;154:2666-77.

- 1  
2  
3  
4  
5  
6 11 Nichol KL, Backen L, Wuorenma J, et al. The health and economic benefits  
7  
8 associated with pneumococcal vaccination of elderly persons with chronic lung disease.  
9  
10 *Arch Intern Med* 1999;159:2437-42.  
11
- 12 12 Huss A, Scott P, Stuck AE, et al. Efficacy of pneumococcal vaccination in adults:  
13  
14 meta-analysis. *Can Med Assoc J* 2009;180:48-58.  
15
- 16 13 Moore RA, Wiffen PJ, Lipsky BA. Are the pneumococcal polysaccharide vaccines  
17  
18 effective? Meta-analysis of the prospective trials. *BMC Fam Pract* 2000;1:1.  
19
- 20 14. Watanuki Y, Miyazawa N, Kudo M, et al. Effects of pneumococcal vaccine in  
21  
22 patients with chronic respiratory disease. *Eur Respir Rev* 2008;17:43-5.  
23  
24
- 25 15 Molinos L, Clemente MG, Miranda B, et al. Community-acquired pneumonia in  
26  
27 patients with and without chronic obstructive pulmonary disease. *J Infec*  
28  
29 2009;58:417-24.  
30  
31
- 32 16 Ortqvist A, Hedlund J, Burman LA, et al. Randomised trial of 23-valent  
33  
34 pneumococcal capsular polysaccharide vaccine in prevention of pneumonia in  
35  
36 middle-aged and elderly people. *Lancet* 1998;351:399-403.  
37  
38
- 39 17 Leech JA, Gervais A, Ruben FL. Efficacy of pneumococcal vaccine in severe  
40  
41 chronic obstructive pulmonary disease. *Can Med Assoc J* 1987;136:361-5.  
42  
43
- 44 18 Davis AL, Aranda CP, Schiffman G, et al. Pneumococcal infection and immunologic  
45  
46 response to pneumococcal vaccine in chronic obstructive pulmonary disease. *Chest*  
47  
48 1987;92:204-12.  
49  
50
- 51 19 Williams JH, Moser KM. Pneumococcal vaccine and patients with chronic lung  
52  
53 disease. *Ann Intern Med* 1986;104:106-9.  
54  
55
- 56 20 Lee TA, Weaver FM, Weiss KB. Impact of pneumococcal vaccination on pneumonia  
57  
58 rates in patients with COPD and asthma. *J Gen Intern Med* 2007;22:62-7.  
59  
60

- 1  
2  
3  
4  
5  
6 21 Alfageme I, Vazquez R, Reyes N, et al. Clinical efficacy of anti-pneumococcal  
7  
8 vaccination in patients with COPD. *Thorax* 2006;61:189-95.  
9  
10 22 Cabello H, Torres A, Ceils R, et al. Bacterial colonization of distal airways in healthy  
11  
12 subjects and chronic lung disease: a bronchoscopic study. *Eur Respir J*  
13  
14 1997;10:1137-44.  
15  
16 23 Rees PJ. Review: inhaled corticosteroid do not reduce mortality but increase  
17  
18 pneumonia in COPD. *Evid Based Med* 2009;14:9.  
19  
20 24 Welte T. Inhaled corticosteroids in COPD and the risk of pneumonia. *Lancet*  
21  
22 2009;374:668-70.  
23  
24 25 Almirall J, Bolibar I, Serra-Prat M, et al. New evidence of risk factors for  
26  
27 community-acquired pneumonia: a population-based study. *Eur Respir J*  
28  
29 2008;31:1274-84.  
30  
31 32 Maruyama T, Taguchi O, Niederman MS, et al. Efficacy of 23-valent pneumococcal  
33  
34 vaccine in preventing pneumonia and improving survival in nursing home residents:  
35  
36 double-blind, randomized and placebo controlled trial. *BMJ* 2010;340:c1004.  
37  
38 39 Lexau CA, Lynfield R, Danila R. Changing epidemiology of invasive pneumococcal  
40  
41 disease among older adults in the era of pediatric pneumococcal conjugate vaccine.  
42  
43 *JAMA* 2005;294:2043-51.  
44  
45 46 28 Smith KJ, Zimmerman RK, Lin CJ, et al. Alternative strategies for adult  
47  
48 pneumococcal polysaccharide vaccination: A cost-effectiveness analysis. *Vaccine*  
49  
50 2008;26:1420-31.  
51  
52 53 29 Musher DM. Pneumococcal vaccine - Direct and indirect (herd) effects. *N Engl J*  
54  
55 *Med* 2006;354:1522-4.  
56  
57 58 30 Andrews A, Nadjim B, Gant V, et al. Community-acquired pneumonia. *Curr Opin*  
59  
60



1  
2  
3  
4  
5  
6 *Pulm Med* 2003;9:175-80.  
7

8 31 Fine MJ, Auble TE, Yealy DM, et al. A prediction rule to indentify low-risk patients  
9  
10 with community-acquired pneumonia. *N Engl J Med* 1997;336:243-50.  
11

12 32 Andreo F, Ruiz-Manzano J, Prat C, et al. Utility of pneumococcal urinary antigen  
13  
14 detection in diagnosing exacerbations in COPD patients. *Respir Med*  
15  
16 2010;104:397-403.  
17  
18

19 33 Waterer GW, Jennings G, Wunderink RG. The impact of blood cultures on antibiotic  
20  
21 therapy in pneumococcal pneumonia. *Chest* 1999;116:1278-81.  
22  
23  
24  
25  
26  
27  
28  
29  
30  
31  
32  
33  
34  
35  
36  
37  
38  
39  
40  
41  
42  
43  
44  
45  
46  
47  
48  
49  
50  
51  
52  
53  
54  
55  
56  
57  
58  
59  
60

STROBE 2007 (v4) Statement—Checklist of items that should be included in reports of cohort studies

| Section/Topic                | Item # | Recommendation                                                                                                                                                                       | Reported on page # |
|------------------------------|--------|--------------------------------------------------------------------------------------------------------------------------------------------------------------------------------------|--------------------|
| Title and abstract           | 1      | (a) Indicate the study’s design with a commonly used term in the title or the abstract                                                                                               | 1-4                |
|                              |        | (b) Provide in the abstract an informative and balanced summary of what was done and what was found                                                                                  | 3,4                |
| <b>Introduction</b>          |        |                                                                                                                                                                                      |                    |
| Background/rationale         | 2      | Explain the scientific background and rationale for the investigation being reported                                                                                                 | 5,6                |
| Objectives                   | 3      | State specific objectives, including any prespecified hypotheses                                                                                                                     | 5,6                |
| <b>Methods</b>               |        |                                                                                                                                                                                      |                    |
| Study design                 | 4      | Present key elements of study design early in the paper                                                                                                                              | 6,7                |
| Setting                      | 5      | Describe the setting, locations, and relevant dates, including periods of recruitment, exposure, follow-up, and data collection                                                      | 6-8                |
| Participants                 | 6      | (a) Give the eligibility criteria, and the sources and methods of selection of participants. Describe methods of follow-up                                                           | 6,7                |
|                              |        | (b) For matched studies, give matching criteria and number of exposed and unexposed                                                                                                  | 6,7,16             |
| Variables                    | 7      | Clearly define all outcomes, exposures, predictors, potential confounders, and effect modifiers. Give diagnostic criteria, if applicable                                             | 7,8                |
| Data sources/<br>measurement | 8*     | For each variable of interest, give sources of data and details of methods of assessment (measurement). Describe comparability of assessment methods if there is more than one group | 7,8                |
| Bias                         | 9      | Describe any efforts to address potential sources of bias                                                                                                                            | 7                  |
| Study size                   | 10     | Explain how the study size was arrived at                                                                                                                                            | 6                  |
| Quantitative variables       | 11     | Explain how quantitative variables were handled in the analyses. If applicable, describe which groupings were chosen and why                                                         | 8,9                |
| Statistical methods          | 12     | (a) Describe all statistical methods, including those used to control for confounding                                                                                                | 8,9                |
|                              |        | (b) Describe any methods used to examine subgroups and interactions                                                                                                                  | 8,9                |
|                              |        | (c) Explain how missing data were addressed                                                                                                                                          | NA                 |
|                              |        | (d) If applicable, explain how loss to follow-up was addressed                                                                                                                       | NA                 |
|                              |        | (e) Describe any sensitivity analyses                                                                                                                                                | NA                 |
| <b>Results</b>               |        |                                                                                                                                                                                      |                    |

|                          |     |                                                                                                                                                                                                              |               |
|--------------------------|-----|--------------------------------------------------------------------------------------------------------------------------------------------------------------------------------------------------------------|---------------|
| Participants             | 13* | (a) Report numbers of individuals at each stage of study—eg numbers potentially eligible, examined for eligibility, confirmed eligible, included in the study, completing follow-up, and analysed            | 9,16          |
|                          |     | (b) Give reasons for non-participation at each stage                                                                                                                                                         | NA            |
|                          |     | (c) Consider use of a flow diagram                                                                                                                                                                           | NA            |
| Descriptive data         | 14* | (a) Give characteristics of study participants (eg demographic, clinical, social) and information on exposures and potential confounders                                                                     | 9,16          |
|                          |     | (b) Indicate number of participants with missing data for each variable of interest                                                                                                                          | NA            |
|                          |     | (c) Summarise follow-up time (eg, average and total amount)                                                                                                                                                  | NA            |
| Outcome data             | 15* | Report numbers of outcome events or summary measures over time                                                                                                                                               | 9-11,16,17,19 |
| Main results             | 16  | (a) Give unadjusted estimates and, if applicable, confounder-adjusted estimates and their precision (eg, 95% confidence interval). Make clear which confounders were adjusted for and why they were included | 9-11,17,18    |
|                          |     | (b) Report category boundaries when continuous variables were categorized                                                                                                                                    | NA            |
|                          |     | (c) If relevant, consider translating estimates of relative risk into absolute risk for a meaningful time period                                                                                             | NA            |
| Other analyses           | 17  | Report other analyses done—eg analyses of subgroups and interactions, and sensitivity analyses                                                                                                               | 10,11,19      |
| <b>Discussion</b>        |     |                                                                                                                                                                                                              |               |
| Key results              | 18  | Summarise key results with reference to study objectives                                                                                                                                                     | 11            |
| <b>Limitations</b>       |     |                                                                                                                                                                                                              |               |
| Interpretation           | 20  | Give a cautious overall interpretation of results considering objectives, limitations, multiplicity of analyses, results from similar studies, and other relevant evidence                                   | 11-15         |
| Generalisability         | 21  | Discuss the generalisability (external validity) of the study results                                                                                                                                        | 11-13         |
| <b>Other information</b> |     |                                                                                                                                                                                                              |               |
| Funding                  | 22  | Give the source of funding and the role of the funders for the present study and, if applicable, for the original study on which the present article is based                                                | 20            |

\*Give information separately for cases and controls in case-control studies and, if applicable, for exposed and unexposed groups in cohort and cross-sectional studies.

**Note:** An Explanation and Elaboration article discusses each checklist item and gives methodological background and published examples of transparent reporting. The STROBE checklist is best used in conjunction with this article (freely available on the Web sites of PLoS Medicine at <http://www.plosmedicine.org/>, Annals of Internal Medicine at <http://www.annals.org/>, and Epidemiology at <http://www.epidem.com/>). Information on the STROBE Initiative is available at [www.strobe-statement.org](http://www.strobe-statement.org).

1  
2  
3  
4  
5  
6  
7  
8  
9  
10  
11  
12  
13  
14  
15  
16  
17  
18  
19  
20  
21  
22  
23  
24  
25  
26  
27  
28  
29  
30  
31  
32  
33  
34  
35  
36  
37  
38  
39  
40  
41  
42  
43  
44  
45  
46  
47  
48  
49  
50  
51  
52  
53  
54  
55  
56  
57  
58  
59  
60

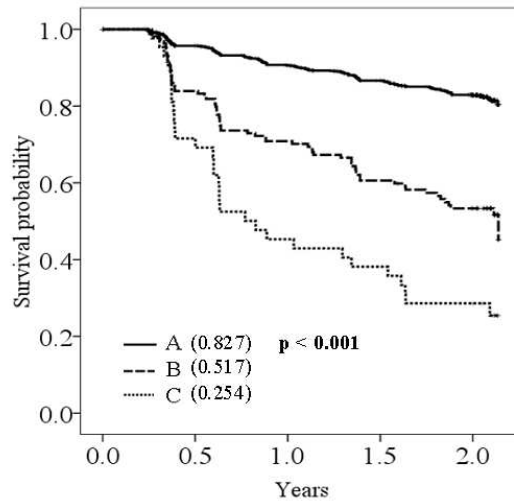

Kaplan-Meier survival curves of patients with/without episodes of pulmonary infection during the pre-vaccine period: A, 0 episodes; B, 1 episode; C, > 1 episode  
Numbers in parenthesis indicate the survival rate at the end of the study.

254x190mm (96 x 96 DPI)

Peer review only

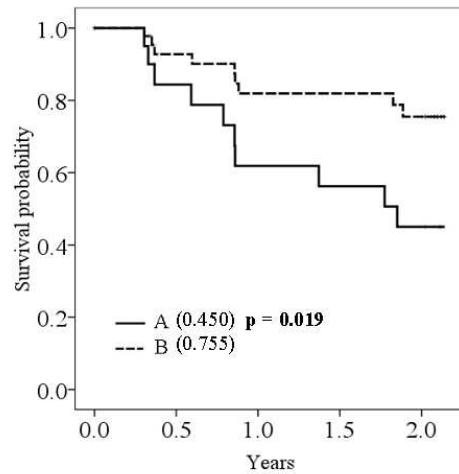

Kaplan-Meier survival curves of patients with chronic respiratory failure who had no episodes of pulmonary infection during the pre-vaccine period: A, unvaccinated; B, vaccinated  
Numbers in parenthesis indicate the survival rate at the end of the study.

254x190mm (96 x 96 DPI)

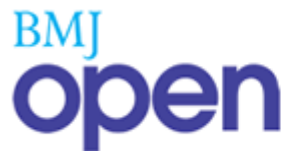

**Heterogeneity of the efficacy of the 23-valent pneumococcal polysaccharide vaccine caused by various underlying conditions of chronic pulmonary disease in elderly patients**

|                               |                                                                                                                                                                                                                                                                            |
|-------------------------------|----------------------------------------------------------------------------------------------------------------------------------------------------------------------------------------------------------------------------------------------------------------------------|
| Journal:                      | <i>BMJ Open</i>                                                                                                                                                                                                                                                            |
| Manuscript ID:                | bmjopen-2011-000105.R1                                                                                                                                                                                                                                                     |
| Article Type:                 | Research                                                                                                                                                                                                                                                                   |
| Date Submitted by the Author: | 06-Apr-2011                                                                                                                                                                                                                                                                |
| Complete List of Authors:     | Inoue, Satoshi; Yokohama City University, Department of Epidemiology and Public Health<br>Watanuki, Yuji<br>Kaneko, Tetsuji<br>Sato, Takashi<br>Miyazawa, Naoki<br>Kaneko, Takeshi<br>Ishigatsubo, Yoshiaki<br>Morita, Satoshi<br>Natsumeda, Yutaka<br>Mizushima, Shunsaku |
| <b>Subject Heading</b>:       | Infectious diseases                                                                                                                                                                                                                                                        |
| Keywords:                     | Infection control < INFECTIOUS DISEASES, Respiratory infections < THORACIC MEDICINE, Adult thoracic medicine < THORACIC MEDICINE                                                                                                                                           |
|                               |                                                                                                                                                                                                                                                                            |

SCHOLARONE™  
Manuscripts

1  
2  
3  
4 **Heterogeneity of the efficacy of the 23-valent pneumococcal polysaccharide vaccine**  
5 **caused by various underlying conditions of chronic pulmonary disease in elderly**  
6 **patients**  
7  
8  
9

10 Satoshi Inoue,<sup>1,5</sup> Yuji Watanuki,<sup>2</sup> Tetsuji Kaneko,<sup>3</sup> Takashi Sato,<sup>2</sup> Naoki Miyazawa,<sup>2</sup>  
11 Takeshi Kaneko,<sup>4</sup> Yoshiaki Ishigatsubo,<sup>2</sup> Satoshi Morita,<sup>3</sup> Yutaka Natsumeda,<sup>5</sup> Shunsaku  
12 Mizushima,<sup>1</sup>  
13  
14  
15

16  
17  
18 <sup>1</sup>Department of Epidemiology and Public Health, Yokohama City University Graduate  
19 School of Medicine, 3-9 Fukuura, Kanazawa-ku Yokohama 236-0004 Japan  
20  
21

22 <sup>2</sup>Department of Internal Medicine and Clinical Immunology, Yokohama City University  
23 Graduate School of Medicine, Yokohama, Japan  
24  
25

26 <sup>3</sup>Department of Biostatistics and Epidemiology, Yokohama City University Graduate  
27 School of Medicine, Yokohama, Japan  
28  
29

30 <sup>4</sup>Department of Pulmonary Medicine, Yokohama City University Graduate School of  
31 Medicine, Yokohama, Japan  
32  
33

34 <sup>5</sup>Department of Clinical Research, Yokohama City University Graduate School of  
35 Medicine, Yokohama, Japan  
36  
37  
38  
39

40 Corresponding author:

41  
42 Satoshi Inoue, MD, PhD

43  
44 Tel: 81-45-787-2610

45  
46 Fax: 81-45-787-2609

47  
48 E-mail: [ino999@yokohama-cu.ac.jp](mailto:ino999@yokohama-cu.ac.jp)  
49  
50  
51  
52  
53  
54  
55  
56  
57  
58  
59  
60

Key word: PPV23, chronic pulmonary disease, elderly patient, respiratory infection

Word count: ~~3262~~

Deleted: 2806

Deleted: 5573

Deleted: 7

Formatted: Font color: Custom Color (RGB(0,112,192))

Formatted: Font color: Red

For peer review only

1  
2  
3  
4  
5  
6  
7  
8  
9  
10  
11  
12  
13  
14  
15  
16  
17  
18  
19  
20  
21  
22  
23  
24  
25  
26  
27  
28  
29  
30  
31  
32  
33  
34  
35  
36  
37  
38  
39  
40  
41  
42  
43  
44  
45  
46  
47  
48  
49  
50  
51  
52  
53  
54  
55  
56  
57  
58  
59  
60



## ABSTRACT

### Objective

To determine the ideal conditions for use of the 23-valent pneumococcal polysaccharide vaccine (PPV23) in elderly outpatients with chronic pulmonary diseases.

### Design

Prospective cohort study

### Participants

A total of 1,378 outpatients with chronic pulmonary diseases  $\geq 60$  years of age

### Intervention

Participants were educated about PPV23, and those who responded affirmatively were vaccinated between August and November 2002. The participants who chose no intervention served as controls. The pre-vaccine period was defined as August 2001 to August 2002. Participants were followed for 2 years from December 2002, or until death.

**Deleted:** to the end of study in November 2004 (for 2 years)

**Formatted:** Font color: Red

### Main outcome measures

Events of interest included the first episode of bacterial (including pneumococcal) pulmonary infection (primary endpoint) and death of any cause (secondary endpoint).

### Results

Frequent episodes of pulmonary infection during the pre-vaccine period significantly decreased event-free survival during the 2-year observation period ( $p < 0.001$ ). Chronic respiratory failure was associated with a decreased event-free survival only when the pulmonary infection episode did not occur in the pre-vaccine period ( $p < 0.001$ ). No significant differences in event-free survival were observed between the vaccinated and unvaccinated group during analysis of the entire cohort. In the Cox proportional hazards

**Deleted:** increased

**Deleted:** the event rate

**Deleted:** an increased number of events

**Deleted:** survival probability

1  
2  
3  
4 regression model, event-free survival decreased significantly when pulmonary infection  
5  
6 occurred in the pre-vaccine period. In the subgroup analysis, the first episode of  
7  
8 bacterial pulmonary infection (but not death of any cause) was reduced significantly by  
9  
10 PPV23 only in patients with chronic respiratory failure who had no episodes of  
11  
12 pulmonary infection during the pre-vaccine period (p = 0.019).

Deleted: the event rate

Deleted: increased

Deleted: or when a patient had chronic respiratory failure

Deleted: PPV23 significantly

Deleted: reduced event rates increased event-free survival

## 14 Conclusion

15  
16 The efficacy of PPV23 against pulmonary infection and death of any cause might be  
17  
18 unachievable if pulmonary infection occurs during the pre-vaccine period. PPV23 needs  
19  
20 to be given to elderly patients with chronic pulmonary disease at an earlier time in  
21  
22 which infectious complications in the lung have not yet occurred.

## 26 Summary

### 27 ● Article focus (hypothesis):

28  
29 The efficacy of PPV23 might be compromised by an episode of pulmonary infection in  
30  
31 the pre-vaccine period or chronic respiratory failure in elderly patients with chronic  
32  
33 pulmonary disease.

Deleted: or chronic respiratory failure

### 36 ● Key messages:

37  
38 1. The PPV23 efficacy might be unachievable if pulmonary infection occurs during the  
39  
40 pre-vaccine period.

41  
42 2. The episode of pulmonary infection could be prevented by PPV23 in elderly patients  
43  
44 with noninfectious complications such as chronic respiratory failure.

Deleted: The Prolonged event rate event-free survival could be reduced obtained

45  
46 3. Elderly patients with chronic pulmonary disease need to receive the PPV23  
47  
48 vaccination at an earlier time in which infectious complications in the lung have not yet  
49  
50 occurred.

● Strengths and limitations of this study:

1. Only participants who responded affirmatively received PPV23. They were not assigned randomly to a group.
2. The diagnosis of pneumococcal pulmonary disease was not made in the majority of patients who had pulmonary infection during the study period. The microbiological diagnosis in the lower respiratory tract, which is not normally sterile, is ambiguous.

## INTRODUCTION

*Streptococcus pneumoniae* continues to be one of the main causative pathogens in community-acquired pneumonia and meningitis.[1-2] Due to the high mortality rate of *S. pneumoniae* infections, especially in elderly and very young patients, prophylactic use of 23-valent pneumococcal polysaccharide vaccine (PPV23) is recommended for people at an increased risk of pneumococcal disease in developed countries.[3-7] The efficacy of PPV23, however, remains controversial. Despite the fact that the results of pre- and post-licensed trials in immunocompetent people were supportive of regulatory approval of vaccine use, clinical studies in elderly or young adults with comorbidities in developed countries produced little convincing evidence of effectiveness against a common manifestation of pneumococcal infections such as pneumonia.[8-12] A retrospective study conducted in 1999 suggested that PPV23 was associated with significant reductions in hospitalisation and mortality rates of elderly patients with chronic lung disease and contributed to medical care cost savings, although meta-analytical reviews published thereafter failed to show statistically significant evidence of the protective effects of PPV23 against the development of pneumonia in elderly patients with chronic illnesses.[13-15]

Deleted: 10

Deleted: 11-13

1  
2  
3  
4 We previously reported a 2-year cohort clinical study of elderly outpatients with  
5 chronic pulmonary disease to investigate the prophylactic effects of PPV23 on bacterial  
6 and pneumococcal pulmonary infection onset and outcome.<sup>[16]</sup> Analysis of the  
7 comparison between the vaccinated and unvaccinated group showed a decline in the  
8 incidence of bacterial pulmonary infection only in the vaccinated group. This result  
9 might be associated with PPV23 effectiveness, although detailed background  
10 information regarding underlying pulmonary conditions was not provided. Subgroup  
11 analysis needs to be carried out since chronic pulmonary disease includes various  
12 clinical and pathophysiological pictures. Underlying pulmonary diseases could cause  
13 chronic respiratory failure if repeatedly complicated by lung infections, and such  
14 heterogeneity may generate different outcomes after vaccination.<sup>[17]</sup> We decided to  
15 reanalyse the data to study the influence of clinical background during the pre-vaccine  
16 period on PPV23 efficacy in elderly patients with chronic pulmonary disease.  
17  
18  
19  
20  
21  
22  
23  
24  
25  
26  
27  
28  
29  
30

Deleted: 14

Deleted: 15

## 31 METHODS

### 32 Study population

33  
34 All the outpatients  $\geq 60$  years of age (a total of 1,378 participants at the start of the  
35 study) with chronic pulmonary disease in the Kanagawa Cardiovascular and Respiratory  
36 Diseases Centre were included in this study. These patients were informed of the  
37 prophylactic effects of PPV23 on infectious pulmonary exacerbations. Chronic  
38 pulmonary diseases in this study included bronchial asthma, chronic pulmonary  
39 emphysema, old tuberculosis, chronic bronchitis, bronchiectasis, nontuberculous  
40 mycobacteria, and others (Table 1). Patients who presented with a fever ( $\geq 37.5$  °C) were  
41 excluded from the study according to the Preventive Vaccination Law issued by the  
42  
43  
44  
45  
46  
47  
48  
49  
50  
51  
52  
53  
54  
55  
56  
57  
58  
59  
60

Deleted: A total of

Deleted: 1,378

Deleted: data

Deleted: (a total of 1,378 participants)

1  
2  
3  
4 Japanese Ministry of Health, Labour and Welfare. Once the clinical status of these  
5  
6 patients became stable, they were invited to participate in the study. Home oxygen  
7  
8 therapy (HOT) had been prescribed according to the Japanese Respiratory Society (JRS)  
9  
10 Guidelines for 97 participants with chronic respiratory failure upon study initiation  
11  
12 (Table 1), but no patients were newly prescribed HOT during the observation period.  
13  
14

Deleted: government

### 16 Study design

17  
18 We did not adopt a randomised controlled study design since the PPV23 vaccination is  
19  
20 considered a part of standard care in many developed countries. Additionally, some  
21  
22 elderly participants with chronic pulmonary disease were in an immunocompromised  
23  
24 status; therefore, a randomised controlled study of vaccine effectiveness may violate  
25  
26 ethical principles and human rights. Written informed consent forms were obtained from  
27  
28 all participants. To avoid selection bias, doctors and other medical staffs were not  
29  
30 allowed to assign patients to the vaccine or non-vaccine group; instead, individual  
31  
32 patients decided whether or not to be vaccinated. The same form, which included an  
33  
34 explanation of the study, was provided to all the participants. A total of 647 patients  
35  
36 were injected with PPV23 (Pneumovax, Merck, NJ, USA) intramuscularly into their  
37  
38 non-dominant upper arm with between August and November 2002. The pre-vaccine  
39  
40 period was defined as 1 year prior to PPV23 vaccination (August 2001 to July 2002).  
41  
42  
43

Deleted: .

Deleted: August

### 44 Data collection

45  
46 Participants were followed from December 2002 to the end of the study in November  
47  
48 2004 (for 2 years) or until death in the clinic approximately every 2 months as long as  
49  
50 clinical status remained stable. A diagnosis of pulmonary infection was made by  
51  
52  
53  
54  
55  
56  
57  
58  
59  
60

respiratory physicians according to the Japanese Respiratory Society Guidelines for the Management of Community-Acquired Pneumonia in Adults. In brief, pulmonary infection was suspected if more than 2 of the following criteria were present: temperature  $\geq 37.0$  °C, white blood cell count  $> 8,000/\text{mm}^3$ , and C-reactive protein  $> 0.7$  mg/dl. A diagnosis of pneumonia was made when chest radiographs revealed alveolar opacities. If a cough with yellow sputum production was observed in the absence of the alveolar opacities on the chest radiograph, the patients were diagnosed with acute bronchitis or exacerbation of chronic bronchitis. It was very difficult to clearly distinguish pneumonia from acute bronchitis or an acute exacerbation of chronic bronchitis in some patients since there were considerable clinical overlaps between these illnesses including the symptoms, blood test results, causative pathogens, and antibiotic treatment. Hence, pulmonary infection was expressed as a dichotomous variable.

A diagnosis of pneumococcal pulmonary infection was made if *Streptococcus pneumoniae* was the dominant organism stained with Gram stain in the sputum smear or if the sputum culture was positive ( $> 10^7$  colony forming units/ml). When *S. pneumoniae* was not identified, patients were diagnosed with a pulmonary infection caused by an identified pathogen or with a bacterial pulmonary infection if no possible causative pathogen was detected but if the clinical data were highly suggestive of bacterial infection in the lung. Empirical antibiotic therapy was started in all the patients promptly once clinical data sufficient to satisfy the definition of pulmonary infection were obtained. The initial treatment was replaced by second-line therapy of antibiotics chosen according to the sensitivity results.

**Deleted:** A diagnosis of pulmonary infection was made by respiratory physicians according to the Japanese Respiratory Society Guidelines for the Management of Community-Acquired Pneumonia in Adults.

**Deleted:** In brief, patients were diagnosed with an infectious lung complication when they presented with fever ( $\geq 38$  °C), cough, yellow sputum, or chest pain and blood testing revealed marked inflammatory responses such as elevated levels of neutrophils and serum C-reactive protein. Chest radiography was performed when an infective inflammatory process in the lung was suspected to distinguish pneumonia from acute bronchitis or infectious exacerbation of chronic bronchitis.

**Formatted:** Indent: First line: 1.5 ch

**Deleted:** In addition to a urinary pneumococcal antigen test, Gram staining and sputum culture were conducted when a diagnosis of bacterial pulmonary infection was made to determine the causative microorganisms and the pattern of antibiotic susceptibility.

**Deleted:** Empirical antibiotic therapy was started promptly after diagnosis of infection in the lung was made.

**Deleted:** The doctors had access to the patients' vaccination record during the follow-up period. However, at the time of this study, PPV23 had already been approved by the Japanese Ministry of Health, Labour and Welfare, and there were no conflicts of interest with pharmaceutical companies. All the treatments were supported by the public health care system funded by the Japanese government; no specific grants were provided from any funding agencies. Diagnosis of pulmonary infection was made according to the same diagnostic criteria.¶

### Event of interest

We hypothesised that repeated pulmonary infection and concomitant gradual loss of lung function might be related to a reduced PPV23 efficacy. Participants were grouped based on these factors: frequency of infectious (including pneumococcal) pulmonary infection episode within 1 year prior to the PPV23 vaccination (0 episodes, 1 episode, and >1 episode), and chronic respiratory failure represented by HOT usage. Events of interest included the first episode of bacterial or pneumococcal pulmonary infection (pneumonia, acute bronchitis, or exacerbation of chronic bronchitis) where antibiotic treatment was required ([primary endpoint](#)), and death of any cause ([secondary endpoint](#)). The case of death with missing values was not counted as an event of interest but was included in the mortality rate.

### Statistical analysis

Differences in [event-free survival](#) were depicted with Kaplan-Meier curves, and the log-rank test was applied for analysis. [The primary and secondary endpoints \(the first episode of pulmonary infection and death of any cause, respectively\) were analysed separately.](#) Cross-tabulated data were compared by the Wilcoxon test or the Pearson's chi-square test. Relative risks for the events were estimated using the Cox proportional hazards regression model. [The covariates used in the analysis were: \(1\) pulmonary infection during the pre-vaccine period, \(2\) chronic respiratory failure, and \(3\) PPV23 vaccination. For further analysis, gender and age were added as covariates and the data were analyzed. No any other variables were regarded as covariates in relation to event-free survival.](#) The PASW statistics 18 (SPSS Inc. IL, USA) and SAS software (SAS Institute Inc. NC, USA) were used for the statistical analysis.

Deleted: .

Deleted: event rates

Deleted: re-

Deleted: s



RESULTS

Participant characteristics are shown in Table 1. Significant reductions in vaccination rate, age, and frequency of chronic respiratory failure were observed in the group without pulmonary infection during the pre-vaccine period compared with the other 2 groups with at least 1 episode of infectious lung complications. No significant gender difference was seen among groups.

The effects of underlying pulmonary conditions on event occurrences were analysed before PPV23 effectiveness were evaluated. Event-free survival in the Kaplan-Meier method dropped significantly as the frequency of pulmonary infection in the pre-vaccine period increased; the first episode of pulmonary infection, Figure 1; death of any cause, Supplemental Figure A. Chronic respiratory failure was associated with a significant decrease in event-free survival only in the absence of pulmonary infection in the pre-vaccine period; the first episode of pulmonary infection, Supplemental Figure B, Table 2; death of any cause, Supplemental Figure C, Supplemental Table A.

Participants were not randomly assigned to groups; vaccination was chosen or declined by each individual. As a result, the number of vaccinated patients was significantly higher than the number of unvaccinated patients when pulmonary infection occurred during the pre-vaccine period (Table 1). No significant PPV23 effectiveness against the development of first episode of pulmonary infection during the observation period was seen between the vaccinated and unvaccinated group in the Kaplan-Meier method (Supplemental Figure D). The mortality rate was, however, significantly high in the vaccinated group (Supplemental Figure E). This result may be misleading due to the vaccination imbalance among groups. In the Cox proportional hazards regression model

Deleted: en

Deleted: In the group without pulmonary infection during the pre-vaccine period, significant

Deleted: (Table 1)

Deleted: The

Deleted: survival rate

Deleted: (Figure 1

Deleted: [

Deleted: (

Deleted: ),

Deleted: (web extra

Deleted: ): death of any cause]

Deleted: event rate increase

Deleted: eventpulmonary infection

Deleted: [

Deleted: ((

Deleted: Table 2,) (

Deleted: B))

Deleted: ,

Deleted: (

Deleted: Table A) (

Deleted: Figure C)

Deleted: A higher mortality rate was seen in patients with pulmonary infection during the pre-vaccine period and in chronic pulmonary failure (p < 0.001). The cause of death during the observation period was as follows: bacterial pneumonia 19 (pneumococcal pneumonia 7), chronic respiratory failure 17, cardiovascular disease 9, lung cancer 21, cerebrovascular disease 5, pneumothorax 1, liver cirrhosis 1, unknown 12 (total 85).

Deleted: follow-up

Deleted: log rank test, p = 0.390.3913;

Deleted: BC

Deleted: log-rank test, p = 0.000.0082;

Deleted: CD



applied for covariate adjustment, no hazardous effects of PPV23 on the incidence or timing of the first episode of pulmonary infection or death of any cause were observed. The hazard ratio for the first episode of pulmonary infection or death of any cause increased significantly due to some covariates such as pulmonary infection during the pre-vaccine period and chronic respiratory failure. Other covariates including gender, and age were not associated with the first episode of pulmonary infection but were associated with death of any cause (Table 3). The cause of death (n = 85) among all the participants during the observation period was shown in Supplemental Table B.

A subgroup analysis was performed to find the ideal condition for PPV23 use in elderly patients with chronic pulmonary disease. There are no significant differences in pulmonary infection-free survival between vaccinated and unvaccinated patients when grouped only by frequency of pulmonary infection in the pre-vaccine period (not shown). Pulmonary infection-free survival was somewhat improved when patients with chronic respiratory failure were vaccinated (p = 0.078). This effectiveness became significant when patients who had at least 1 episode of pulmonary infection in the pre-vaccine period were excluded (Figure 2) (Table 4). The mortality was not reduced by PPV23 in patients with chronic respiratory failure who had no episodes of pulmonary infection during the pre-vaccine period (Supplemental Figure F). The cause of death (n = 9) among patients with chronic respiratory failure who had no episodes of pulmonary infection during the pre-vaccine period was as follows: chronic respiratory failure, 2; cerebrovascular disease, 2; and unknown, 1 in vaccinated patients and chronic respiratory failure, 2; lung cancer, 1; and unknown, 1 in unvaccinated patients. In this group, PPV23 was shown to have an effect on the first episode of pulmonary infection but it did not reduce the number of deaths due to any cause.

**Deleted:** during the pre-vaccine period

**Deleted:** t

**Deleted:** The Cox proportional hazards regression model applied for covariate adjustment showed that the episodes of pulmonary infection and chronic respiratory failure in the pre-vaccine period were associated with an increased risk of pulmonary infection and death after PPV23 vaccination (Table 3). No significant effects of PPV23 on mortality rate were observed (Table 3). ¶

**Deleted:** (n = 85)

**Deleted:** follow-up

**Deleted:** C

**Deleted:** as follows: bacterial pulmonary pneumonia, 11 (including 5 cases of pneumococcal pneumonia); chronic respiratory failure, 13; chronic heart failure, 5; cardiovascular disease, 1; lung cancer, 12; cerebrovascular disease, 5; and unknown, 7 in unvaccinated patients and bacterial pneumonia, 8 (including 2 cases of pneumococcal pneumonia); chronic respiratory failure, 6; chronic heart failure, 2; lung cancer, 9; liver cirrhosis, 1; and unknown, 5 in vaccinated patients. The cause of death during the observation period was as follows: bacterial pneumonia 19 (pneumococcal pneumonia 7), chronic respiratory failure 17, cardiovascular disease 9, lung cancer 21, cerebrovascular disease 5, pneumothorax 1, liver cirrhosis 1, unknown 12 (total 85).

**Deleted:** These results suggested the following: PPV23 efficacy might be compromised by some factors such as pulmonary infection in the pre-vaccine period or chronic respiratory failure; and imbalance of PPV23 distribution among the groups may be associated with an increased mortality rate in the vaccinated group.¶

**Deleted:** The event rateEvent

**Deleted:**

**Deleted:** reduced

**Deleted:** 0.071

**Deleted:** an

**Deleted:** (p = 0.381)

**Deleted:** un

**Deleted:** Of note, the final event-free survival rate was 0.755, which was close to the levels observed in patients who had not had an episode of pulmonary infection and chronic respiratory failure during the pre-vaccine period (Table 4). These results suggest that PPV23 might provide beneficial effects in elderl[... [1]

There were only 29 pneumococcal pulmonary infection during the observation period (pneumococcal pulmonary infection, 22; death, 7; [Supplemental Table C](#)). The pneumococcal pneumonia-free survival decreased significantly in the presence of pulmonary infection during the pre-vaccine period ( $p < 0.001$ ; [Supplemental Figure G](#)). No effects of chronic respiratory failure on pneumococcal pneumonia-free survival were observed ( $p = 0.196$ ). PPV23 vaccination did not show significant protective effects against the development of pneumococcal pneumonia ([Supplemental Figure H](#)).

Deleted: events

Deleted: AB

Deleted: probability of

Deleted: events

Deleted: increased

Deleted: log-rank test,

Deleted: DEF

Deleted: survival rateevent

Deleted: events

Deleted: even after subgroup analysis

Deleted: (data not shown)

Deleted: log-rank test,  $p = 0.637858$ ;

Deleted: EFG

## DISCUSSION

The effects of the PPV23 vaccination on elderly patients with chronic pulmonary disease varied in accordance with the frequency of lung infection episodes and the presence of chronic respiratory failure during the pre-vaccine period. Our findings suggest the following: PPV23 vaccination might work effectively unless previous lung infection episodes had occurred; and subgroup analysis of the underlying disease associated with pneumococcal complications might be useful for finding the possible ideal conditions for PPV23 use. To our knowledge, this is the first report to characterise PPV23 effectiveness due to the heterogeneity of underlying lung conditions such as the presence of pulmonary infection episodes prior to vaccination or chronic pulmonary failure in elderly patients with chronic pulmonary disease.

### Comparison with other studies

Previous pulmonary infection was highly associated with poor clinical prognosis. This finding suggests that beneficial PPV23 effectiveness might be unachievable for elderly people with chronic pulmonary disease in the presence of infectious complications

1  
2  
3  
4 during the pre-vaccine period. In a multicentre double-blind controlled study conducted  
5  
6 in Sweden, PPV23 was not efficacious against overall pneumonia in middle or elderly  
7  
8 non-immunocompromised individuals who had been treated for community-acquired  
9  
10 pneumonia.<sup>[18]</sup> In that study, the survival rate calculated by the Kaplan-Meier method  
11  
12 was still >80% in both vaccinated and unvaccinated populations after 2-year  
13  
14 observation, while our results showed that the survival rate was <60% if episodes of  
15  
16 pulmonary infection had occurred within 1 year prior to vaccination. These results are  
17  
18 consistent with previous suggestions that chronic pulmonary disease such as chronic  
19  
20 obstructive pulmonary disease (COPD) is a risk factor for repeated pneumonia and that  
21  
22 protective effects of PPV23 could not be obtained.<sup>[19-21]</sup> Conflicting results were  
23  
24 shown in some other reports in which the beneficial effects of PPV23 in patients with  
25  
26 COPD were indicated, although previous episodes of pneumonia prior to vaccination  
27  
28 were not considered and participants were not limited to the elderly.<sup>[13, 22]</sup> Alfageme  
29  
30 et al showed PPV23 effectiveness in patients <65 years of age with COPD in a  
31  
32 randomised controlled study in 596 patients.<sup>[23]</sup> These results and our data indicate that  
33  
34 PPV23 might be inefficacious on the elderly population with chronic pulmonary disease  
35  
36 especially when complicated by lung infection prior to the vaccination. Despite the  
37  
38 strong evidence of PPV23 efficacy against invasive pneumococcal disease (IPD),  
39  
40 altered immune response, disruption of a physical barrier in the airways due to  
41  
42 progressive chronic pulmonary disease, and repeated pulmonary infection could  
43  
44 compromise the benefits.<sup>[1, 24]</sup> PPV23 vaccination should be given to patients with  
45  
46 chronic pulmonary disease at an earlier stage in which infectious complications have not  
47  
48 yet occurred.

Deleted: 16

Deleted: 17-19

Deleted: 11

Deleted: 20

Deleted: 21

Deleted: 22

50 The probability of survival was significantly increased by PPV23 in the presence of  
51  
52  
53  
54  
55  
56  
57  
58  
59  
60

1  
2  
3  
4 chronic respiratory failure in patients without episodes of pulmonary infection during  
5 the pre-vaccine period. The pulmonary infection-free survival rate was 75.5% at the end  
6 of the observation period when PPV23 was given. Without PPV23, survival was  
7  
8 reduced to 45.0%, almost the same level as that in the case where infectious lung  
9  
10 complications had occurred during the pre-vaccine period. This result indicates that  
11  
12 pulmonary infection due to chronic respiratory failure could be prevented by the PPV23  
13  
14 vaccination. Oxygen therapy and inhalation therapy containing corticosteroids may be  
15  
16 administered in COPD patients when airflow is severe and chronic respiratory failure is  
17  
18 present, but these treatments were suggested to be risk factors for community-acquired  
19  
20 pneumonia.<sup>[25-27]</sup> Additionally, bacterial colonisation of the distal airway may occur  
21  
22 due to the altered pulmonary defense.<sup>[24]</sup> We suggest that patients receive the PPV23  
23  
24 vaccination soon after the diagnosis of chronic respiratory disease such as COPD,  
25  
26 especially when maintenance treatments for impaired lung function are expected to be  
27  
28 risk factors for pneumonia. In this study, the number of participants with chronic  
29  
30 respiratory failure who were free of lung infections during the pre-vaccine period was  
31  
32 only 70. Thus, a large scale study is warranted.  
33  
34  
35  
36  
37

Deleted: prior to vaccination

Deleted: event

Deleted: or death

Deleted: preventedreduc

Deleted: 23-25

Deleted: <sup>[22]</sup>

### 38 **Strengths and limitations of the study**

39  
40 When informed consents were obtained prior to the study initiation, PPV23 vaccine  
41  
42 recommendations were made and only participants who responded affirmatively  
43  
44 received the vaccination. This method may be associated with these results: the  
45  
46 vaccination rate increased significantly in high-risk patients who had at least 1 episode  
47  
48 of bacterial pulmonary infection during the pre-vaccine period or chronic respiratory  
49  
50 failure; and the mortality rate was higher in vaccinated patients, although the presence  
51  
52  
53  
54  
55  
56  
57  
58  
59  
60

1  
2  
3  
4 of adverse effects of PPV23 is unlikely because PPV23 had generally been considered  
5 safe based on clinical experience since 1977.[7] In the Cox proportional hazards model,  
6  
7  
8  
9  
10  
11  
12  
13  
14  
15  
16  
17  
18  
19  
20  
21  
22  
23  
24  
25  
26  
27  
28  
29  
30  
31  
32  
33  
34  
35  
36  
37  
38  
39  
40  
41  
42  
43  
44  
45  
46  
47  
48  
49  
50  
51  
52  
53  
54  
55  
56  
57  
58  
59  
60

of adverse effects of PPV23 is unlikely because PPV23 had generally been considered safe based on clinical experience since 1977.[7] In the Cox proportional hazards model, PPV23 was not a risk factor for the events. All of the participants in this study were elderly patients with chronic pulmonary disease, and all of them could be categorised into groups for which PPV23 vaccination is recommended in the United States and some European countries.[3, 7, 14] In Japan, no vaccine recommendations against pneumococcal infection are issued by the Japanese Ministry of Health, Labour and Welfare.[11] Japanese participants need to accept some risks for the public benefit and not for their own if selected for the unvaccinated group. This condition is different from that in some developed countries where unvaccinated control subjects in clinical trials of the PPV23 vaccine could still be protected by previous vaccination and indirect immunity from other people, including children.[28-30] Pneumococcal infection was associated with increasing mortality rates, while the beneficial effects of PPV23 without any severe adverse events were suggested in some previous clinical trials.[1, 8, 15, 31-32] Therefore, we decided to conduct a nonrandomised clinical study to ensure that participants were treated with respect and dignity.

Deleted: 26

Deleted: 27-29

Deleted: 13

Deleted: 30-31

Deleted: follow-up

The doctors had access to the patients' vaccination record during the observation period. However, at the time of this study, PPV23 had already been approved by the Japanese Ministry of Health, Labour and Welfare, and there were no conflicts of interest with pharmaceutical companies. All the treatments were supported by the public health care system funded by the Japanese government; no specific grants were provided from any funding agencies. Diagnosis of pulmonary infection was made according to the same diagnostic criteria. Therefore it is unlikely that treatment bias occurred during the observation period.

Deleted: had could have

1  
2  
3  
4 The diagnosis of pneumococcal disease was not made in the majority of patients  
5  
6 who had pulmonary infections during the observation period. Identification of *S.*  
7  
8 *pneumoniae* using a sputum Gram stain is required for definitive diagnosis. However,  
9  
10 compared to IPD defined as any condition in which *S. pneumonia* is identified in a  
11  
12 normally sterile body site, microbiological diagnosis in the lower respiratory tract is  
13  
14 ambiguous.[1, 5] It was noted by many authors that respiratory secretion samples for  
15  
16 pneumococcal identification might be unreliable due to the technical difficulties in  
17  
18 obtaining good-quality sputum and in distinguishing causative specimens from  
19  
20 colonisation.[21] The positive results in urine antigen testing might be related to  
21  
22 previous infection or colonisation.[33] It might be difficult to assess PPV23  
23  
24 effectiveness on pneumococcal pulmonary infection using these procedures. Blood  
25  
26 cultures are recommended for patients hospitalised after a diagnosis of  
27  
28 community-acquired pneumonia, although its cost-effectiveness has been questioned in  
29  
30 several studies.[34] Less expensive, novel techniques for accurate diagnosis of  
31  
32 pneumonia need to be developed.  
33

Deleted: ¶

Deleted: 19

Deleted: , 3233

Deleted: 33

### 34 35 36 **Conclusions and policy implications**

37  
38 Our data demonstrated that the beneficial effects of the PPV23 vaccination may not be  
39  
40 obtainable if an episode of pulmonary infection occurred during the pre-vaccine period  
41  
42 in elderly patients with chronic pulmonary disease. We suggest that PPV23 needs to be  
43  
44 given soon after chronic pulmonary disease is diagnosed. In developed countries,  
45  
46 including Japan, elderly populations with chronic pulmonary disease are growing in  
47  
48 number. The Japanese Ministry of Health, Labour and Welfare should introduce the  
49  
50 PPV23 vaccination for patients with chronic pulmonary disease and in routine  
51  
52  
53  
54  
55  
56  
57  
58  
59  
60

1  
2  
3  
4 vaccination of children along with pneumococcal conjugate vaccine that could provide  
5  
6 indirect beneficial effects to the population in whom PPV23 efficacy may not be  
7  
8 expected.  
9  
10  
11  
12  
13  
14  
15  
16  
17  
18  
19  
20  
21  
22  
23  
24  
25  
26  
27  
28  
29  
30  
31  
32  
33  
34  
35  
36  
37  
38  
39  
40  
41  
42  
43  
44  
45  
46  
47  
48  
49  
50  
51  
52  
53  
54  
55  
56  
57  
58  
59  
60

For peer review only

**Table 1: Baseline characteristics of 1378 outpatients with chronic pulmonary disease**

|                              | Frequency of pulmonary infection during the pre-vaccine period |                |                | P Value <sup>†</sup> |
|------------------------------|----------------------------------------------------------------|----------------|----------------|----------------------|
|                              | 0<br>(n = 1164)                                                | 1<br>(n = 167) | >1<br>(n = 43) |                      |
| Age                          |                                                                |                |                |                      |
| Mean ± SD                    | 71.3 ± 7.0                                                     | 73.3 ± 6.9     | 73.0 ± 7.0     | < 0.001              |
| Median                       | 71                                                             | 73             | 73             |                      |
| Male                         | 626 (53.8%)                                                    | 98 (58.7%)     | 27 (62.8%)     | 0.272                |
| Female                       | 538 (46.2%)                                                    | 69 (41.3%)     | 16 (37.2%)     |                      |
| Chronic respiratory disease* |                                                                |                |                |                      |
| Bronchial asthma             | 517                                                            | 59             | 16             |                      |
| Chronic pulmonary emphysema  | 197                                                            | 40             | 14             |                      |
| Old tuberculosis             | 157                                                            | 33             | 10             |                      |
| Chronic bronchitis           | 106                                                            | 18             | 5              |                      |
| Interstitial pneumonia       | 100                                                            | 9              | 0              |                      |
| Non-tuberculous mycobacteria | 84                                                             | 10             | 2              |                      |
| Bronchioectasis              | 31                                                             | 13             | 5              |                      |
| Others                       | 103                                                            | 15             | 4              |                      |
| PPV23-vaccinated             | 512 (44.0%)                                                    | 109 (65.3%)    | 25 (58.1%)     | < 0.001              |
| PPV23-unvaccinated           | 652 (56.0%)                                                    | 58 (34.7%)     | 18 (41.9%)     |                      |
| Chronic respiratory failure  |                                                                |                |                |                      |
| +                            | 70 (6.0%)                                                      | 20 (12.0%)     | 7 (16.3%)      | < 0.001              |
| -                            | 1094 (94.0%)                                                   | 147 (88.0%)    | 36 (83.7%)     |                      |

\*Some patients were diagnosed as having more than one chronic respiratory disease.

<sup>†</sup>Data was analyzed using the Wilcoxon test or the Pearson's test.



1  
2  
3  
4  
5  
6  
7  
8  
9  
10  
11  
12  
13  
14  
15  
16  
17  
18  
19  
20  
21  
22  
23  
24  
25  
26  
27  
28  
29  
30  
31  
32  
33  
34  
35  
36  
37  
38  
39  
40  
41  
42  
43  
44  
45  
46  
47

Table 2: The effects of pulmonary infection during the pre-vaccine period and chronic respiratory failure on pulmonary infection-free survival after PPV23 vaccination

| Frequency of pulmonary infection during the pre-vaccine period | Chronic respiratory failure | N    | event* | Pulmonary infection-free survival at the end of the study* | 95% CI        | P value† |
|----------------------------------------------------------------|-----------------------------|------|--------|------------------------------------------------------------|---------------|----------|
| 0                                                              | (-)                         | 1094 | 154    | 0.840                                                      | 0.816 – 0.864 | <0.001   |
| 0                                                              | (+)                         | 70   | 19     | 0.653                                                      | 0.525 – 0.781 |          |
| 1                                                              | (-)                         | 147  | 59     | 0.550                                                      | 0.462 – 0.638 | 0.506    |
| 1                                                              | (+)                         | 20   | 10     | 0.409                                                      | 0.168 – 0.649 |          |
| >1                                                             | (-)                         | 36   | 25     | 0.315                                                      | 0.161 – 0.469 | 0.348    |
| >1                                                             | (+)                         | 7    | 6      | 0.143                                                      | 0.000 – 0.402 |          |

\*Event represented the number of patients who were diagnosed with pulmonary infection during the observation period.

†Data was analyzed using the log-rank test.

- Deleted: during the pre-vacci... [2]
- Deleted: Event
- Formatted Table ... [3]
- Deleted: \*
- Formatted ... [4]
- Deleted: E
- Deleted: S...rate ... [5]
- Formatted ... [6]
- Deleted: 0.843
- Formatted ... [7]
- Deleted: 0.689
- Formatted ... [8]
- Formatted ... [9]
- Deleted: 0.527
- Formatted ... [10]
- Deleted: 0.450
- Formatted ... [11]
- Formatted ... [12]
- Deleted: 0.275
- Formatted ... [13]
- Deleted: 0.143
- Formatted ... [14]
- Formatted ... [15]
- Formatted ... [16]
- Deleted: follow-up
- Formatted ... [17]
- Deleted: \*
- Formatted ... [18]
- Deleted: ¶ ... [19]

**Table 3: Association of the frequency of pulmonary infection during the pre-vaccine period, chronic respiratory failure, PPV23, gender and age, with the first episode of pulmonary infection or death of any cause.**

Deleted: and the... vaccination...the development of ...events or death of any cause [20]

|                                                                            | Hazard ratio | 95% CI        | P Value |
|----------------------------------------------------------------------------|--------------|---------------|---------|
| <b>Covariates for the risk of the first episode of pulmonary infection</b> |              |               |         |
| <b>Pulmonary infection during the pre-vaccine period</b>                   |              |               |         |
| 1 episode                                                                  | 3.251*       | 2.436 – 4.338 | <0.001  |
| >1 episode                                                                 | 6.480*       | 4.380 – 9.589 | <0.001  |
| Chronic respiratory failure                                                | 1.767        | 1.227 – 2.546 | 0.002   |
| PPV23 vaccination                                                          | 1.096        | 0.848 – 1.416 | 0.396   |
| Gender                                                                     | 0.911        | 0.712 – 1.166 | 0.457   |
| Age                                                                        | 0.994        | 0.976 – 1.013 | 0.553   |
| <b>Covariates for the risk of death of any cause</b>                       |              |               |         |
| <b>Pulmonary infection during the pre-vaccine period</b>                   |              |               |         |
| 1 episode                                                                  | 2.289*       | 1.380 – 3.797 | 0.001   |
| >1 episode                                                                 | 3.134*       | 1.486 – 6.612 | 0.003   |
| Chronic respiratory failure                                                | 2.152        | 1.234 – 3.752 | 0.007   |
| PPV23 vaccination                                                          | 0.795        | 0.499 – 1.264 | 0.332   |
| Gender                                                                     | 0.340        | 0.199 – 0.580 | <0.001  |
| Age                                                                        | 1.040        | 1.008 – 1.072 | 0.014   |

Deleted: events

Deleted: ...4.319 [21]

Deleted: ...9.487 [22]

Deleted: 1.779... [23]

Deleted: [24]

Deleted: 0.900... [24]

Deleted: [24]

Formatted Table

Deleted: 0.149

Deleted: 2.761... [25]

Deleted: <0.001

Formatted Table

Deleted: 1.473... [26]

Deleted: 0.097

Formatted: Justified, Indent: First line: 1 ch

\*Hazard ratio was estimated in relative to the case of outpatients with no episode of pulmonary infection during the pre-vaccine period.

**Table 4: The influence of pulmonary infection during the pre-vaccine period and chronic respiratory failure on the PPV23 vaccine efficacy**

| Frequency of pulmonary infection during the pre-vaccine period | Chronic respiratory failure | Vaccinated* | Unvaccinated* | P Value <sup>†</sup> |
|----------------------------------------------------------------|-----------------------------|-------------|---------------|----------------------|
| (-)                                                            | (-)                         | 0.846 (465) | 0.836 (629)   | 0.931                |
|                                                                | (+)                         | 0.755 (47)  | 0.450 (23)    | 0.019                |
| <b>1 episode</b>                                               | (-)                         | 0.557 (92)  | 0.490 (55)    | 0.665                |
|                                                                | (+)                         | 0.431 (17)  | 0.333 (3)     | 0.876                |
| <b>&gt;1 episode</b>                                           | (-)                         | 0.317 (22)  | 0.214 (13)    | 0.200                |
|                                                                | (+)                         | 0.000 (3)   | 0.250 (4)     | 0.093                |

\*Data represented the pulmonary infection-free survival (%), at the end of the study (2 years after PPV23 vaccination). Numbers in parenthesis indicate numbers of patients.

<sup>†</sup>Data was analyzed using the log-rank test.

Deleted: ¶  
¶  
¶  
¶  
¶  
.....Section Break (Next Page).....

Deleted: during the pre-vaccine period

Formatted Table

Formatted: Indent: First line: 2 ch

Formatted: Indent: First line: 1.5 ch

Formatted: Indent: First line: 2 ch

Formatted: Indent: First line: 1.5 ch

Formatted: Indent: First line: 2 ch

Formatted: Indent: First line: 1.5 ch

Formatted: Indent: First line: 2 ch

Formatted: Indent: First line: 1.5 ch

Formatted: Indent: First line: 2 ch

Formatted: Indent: First line: 1.5 ch

Formatted: Indent: First line: 2 ch

Formatted: Indent: First line: 1.5 ch

Deleted: rate

Deleted: the

1  
2  
3  
4 **Contributions:** SI analysed the data, and drafted and revised the paper. YW designed  
5 the whole study, and collected the data from the clinical records of the participants. TK  
6 wrote the statistical analysis plan, and analysed the data. TS, NM, TK and YI interpreted  
7 the findings, and revised the draft paper. SM, YN and SM supervised data analysis and  
8 assessment.  
9

10  
11  
12  
13  
14 **Funding:** This research received no specific grants from any funding agencies in the  
15 public, commercial or not-for-profit sectors.  
16

17  
18 **Competing interests:** None declared.  
19

20  
21 **Ethical approval:** Full approval of Institutional Review Board in the Kanagawa  
22 Cardiovascular and Respiratory Diseases Centre was obtained prior to the study  
23 initiation.  
24

25  
26 **Data sharing:** No additional data available.  
27

#### 28 **Acknowledgement**

29  
30 The material (clinical data) that had been used for ref. 14 is modified and printed with  
31 the permission of the ©European Respiratory Society.  
32  
33

#### 34 35 36 **Copyright license statement**

37  
38 The Corresponding Author has the right to grant on behalf of all authors and does grant  
39 on behalf of all authors, an exclusive license (or non-exclusive for UK Crown  
40 Employees) on a worldwide basis to the BMJ Publishing Group Ltd, and its Licensees  
41 to permit this article (if accepted) to be published in BMJ Open and any other BMJ  
42 PGL products and to exploit all subsidiary rights, as set out in our license.”  
43  
44  
45  
46  
47  
48  
49  
50  
51  
52  
53  
54  
55  
56  
57  
58  
59  
60

## References

- 1 Moberley S, Holden J, Tantham DP, et al. Vaccines for preventing pneumococcal infection in adults. *Cochrane Database (Review)* 2008 (1):CD000422.
- 2 Heather E, Hsu MPH, Kathleen A, et al. Effects of pneumococcal conjugate vaccine on pneumococcal meningitis. *N Engl J Med* 2009;360:244-56.
- 3 CDC. Updated recommendations for prevention of invasive pneumococcal disease among adults using the 23-valent pneumococcal polysaccharide vaccine (PPSV23). *Morb Mortal Wkly Rep* 2010;59:34.
- 4 Vila-Corcoles A, Ochoa-Gondar O, Guzman JA, et al. Effectiveness of the 23-valent pneumococcal polysaccharide vaccine against invasive pneumococcal disease in people 60 years or older. *BMC Infect Dis* 2010;10:73.
- 5 World Health Organization. 23-valent pneumococcal polysaccharide vaccine WHO position paper. *Wkly Epidemiol Rep* 2008;83:373-84.
- 6 Smith FE, Mann JM. Pneumococcal pneumonia: Experience in a community hospital. *West J Med* 1982;136:1-5.
- 7 CDC. Prevention of pneumococcal disease: recommendations of the advisory committee on immunization practices (ACIP). *Wkly Epidemiol Rep* 1997;46:RR-8.
- 8 Jackson LA, Neuzil KM, Yu O, et al. Effectiveness of pneumococcal polysaccharide vaccine in older adults. *N Engl J Med* 2003;348:1747-55.
- 9 Andrews R, Moberley SA. The controversy of the efficacy of pneumococcal vaccine. *Can Med Assoc J* 2009;180:18-19.
- 10 Fine MJ, Smith MA, Carson CA, et al. Efficacy of pneumococcal vaccination in adults. *Arch Intern Med* 1994;154:2666-77.

1  
2  
3  
4 [11 Maruyama T, Taguchi O, Niederman MS, et al. Efficacy of 23-valent pneumococcal](#)  
5 [vaccine in preventing pneumonia and improving survival in nursing home residents:](#)  
6 [double-blind, randomized and placebo controlled trial. \*BMJ\* 2010;340:c1004.](#)  
7  
8

9  
10 [12 Pedersen RH, Lohse N, Ostergaard L, et al. The effectiveness of pneumococcal](#)  
11 [polysaccharide vaccination in HIV-infected adults: a systematic review. \*HIV\*](#)  
12 [Med:DOI:10.1111/j.1468-1293.2010.00892.x.](#)  
13  
14

15  
16 [13 Nichol KL, Backen L, Wuorenma J, et al. The health and economic benefits](#)  
17 [associated with pneumococcal vaccination of elderly persons with chronic lung disease.](#)  
18 [Arch Intern Med 1999;159:2437-42.](#)  
19  
20

Deleted: 11

21  
22 [14 Huss A, Scott P, Stuck AE, et al. Efficacy of pneumococcal vaccination in adults:](#)  
23 [meta-analysis. \*Can Med Assoc J\* 2009;180:48-58.](#)  
24  
25

Deleted: 12

26  
27 [15 Moore RA, Wiffen PJ, Lipsky BA. Are the pneumococcal polysaccharide vaccines](#)  
28 [effective? Meta-analysis of the prospective trials. \*BMC Fam Pract\* 2000;1:1.](#)  
29

Deleted: 13

30  
31 [16. Watanuki Y, Miyazawa N, Kudo M, et al. Effects of pneumococcal vaccine in](#)  
32 [patients with chronic respiratory disease. \*Eur Respir Rev\* 2008;17:43-5.](#)  
33

Deleted: 14

34  
35 [17 Molinos L, Clemente MG, Miranda B, et al. Community-acquired pneumonia in](#)  
36 [patients with and without chronic obstructive pulmonary disease. \*J Infec\*](#)  
37 [2009;58:417-24.](#)  
38

Deleted: 15

39  
40 [18 Ortvist A, Hedlund J, Burman LA, et al. Randomised trial of 23-valent](#)  
41 [pneumococcal capsular polysaccharide vaccine in prevention of pneumonia in](#)  
42 [middle-aged and elderly people. \*Lancet\* 1998;351:399-403.](#)  
43  
44

Deleted: 16

45  
46 [19 Leech JA, Gervais A, Ruben FL. Efficacy of pneumococcal vaccine in severe](#)  
47 [chronic obstructive pulmonary disease. \*Can Med Assoc J\* 1987;136:361-5.](#)  
48  
49

Deleted: 17

50  
51 [20 Davis AL, Aranda CP, Schiffman G, et al. Pneumococcal infection and immunologic](#)  
52  
53

Deleted: 18

response to pneumococcal vaccine in chronic obstructive pulmonary disease. *Chest*

1987;92:204-12.

21 Williams JH, Moser KM. Pneumococcal vaccine and patients with chronic lung disease. *Ann Intern Med* 1986;104:106-9.

Deleted: 19

22 Lee TA, Weaver FM, Weiss KB. Impact of pneumococcal vaccination on pneumonia rates in patients with COPD and asthma. *J Gen Intern Med* 2007;22:62-7.

Deleted: 20

23 Alfageme I, Vazquez R, Reyes N, et al. Clinical efficacy of anti-pneumococcal vaccination in patients with COPD. *Thorax* 2006;61:189-95.

Deleted: 21

24 Cabello H, Torres A, Ceils R, et al. Bacterial colonization of distal airways in healthy subjects and chronic lung disease: a bronchoscopic study. *Eur Respir J*

1997;10:1137-44.

Deleted: 22

25 Rees PJ. Review: inhaled corticosteroid do not reduce mortality but increase pneumonia in COPD. *Evid Based Med* 2009;14:9.

Deleted: 23

26 Welte T. Inhaled corticosteroids in COPD and the risk of pneumonia. *Lancet* 2009;374:668-70.

Deleted: 24

27 Almirall J, Bolibar I, Serra-Prat M, et al. New evidence of risk factors for community-acquired pneumonia: a population-based study. *Eur Respir J* 2008;31:1274-84.

Deleted: 25

28 Lexau CA, Lynfield R, Danila R. Changing epidemiology of invasive pneumococcal disease among older adults in the era of pediatric pneumococcal conjugate vaccine. *JAMA* 2005;294:2043-51.

Deleted: 26 Maruyama T, Taguchi O, Niederman MS, et al. Efficacy of 23-valent pneumococcal vaccine in preventing pneumonia and improving survival in nursing home residents: double-blind, randomized and placebo controlled trial. *BMJ* 2010;340:c1004. 27

29 Smith KJ, Zimmerman RK, Lin CJ, et al. Alternative strategies for adult pneumococcal polysaccharide vaccination: A cost-effectiveness analysis. *Vaccine*

Deleted: 28

2008;26:1420-31.

1  
2  
3  
4 [30](#) Musher DM. Pneumococcal vaccine - Direct and indirect (herd) effects. *N Engl J*  
5 *Med* 2006;354:1522-4.

Deleted: 2931

6  
7  
8 [31](#) Andrews A, Nadjim B, Gant V, et al. Community-acquired pneumonia. *Curr Opin*  
9 *Pulm Med* 2003;9:175-80.

Deleted: 30

10  
11  
12 [32](#) Fine MJ, Auble TE, Yealy DM, et al. A prediction rule to indentify low-risk patients  
13 with community-acquired pneumonia. *N Engl J Med* 1997;336:243-50.

Deleted: 31

14  
15  
16 [33](#) Andreo F, Ruiz-Manzano J, Prat C, et al. Utility of pneumococcal urinary antigen  
17 detection in diagnosing exacerbations in COPD patients. *Respir Med*  
18  
19  
20  
21  
22 2010;104:397-403.

Deleted: 32

23 [34](#) Waterer GW, Jennings G, Wunderink RG. The impact of blood cultures on antibiotic  
24  
25  
26  
27  
28  
29  
30  
31  
32  
33  
34  
35  
36  
37  
38  
39  
40  
41  
42  
43  
44  
45  
46  
47  
48  
49  
50  
51  
52  
53  
54  
55  
56  
57  
58  
59  
60  
therapy in pneumococcal pneumonia. *Chest* 1999;116:1278-81.

Deleted: 33



1  
2  
3  
4  
5  
6  
7  
8  
9  
10  
11  
12  
13  
14  
15  
16  
17  
18  
19  
20  
21  
22  
23  
24  
25  
26  
27  
28  
29  
30  
31  
32  
33  
34  
35  
36  
37  
38  
39  
40  
41  
42  
43  
44  
45  
46  
47  
48  
49  
50  
51  
52  
53  
54  
55  
56  
57  
58  
59  
60

**Page 11: [1] Deleted** 作成者

Of note, the final event-free survival rate was 0.755, which was close to the levels observed in patients who had not had an episode of pulmonary infection and chronic respiratory failure during the pre-vaccine period (Table 4). These results suggest that PPV23 might provide beneficial effects in elderly patients with chronic respiratory failure if episodes of pulmonary infection during the pre-vaccine period did not occur.

**Page 19: [2] Deleted** 作成者

**during the pre-vaccine period**

**Page 19: [2] Deleted** 作成者

**the event**

**Page 19: [2] Deleted** 作成者

**rate**

**Page 19: [2] Deleted** 作成者

**the**

**Page 19: [3] Change** 作成者

Formatted Table

**Page 19: [4] Formatted** 作成者

Superscript

**Page 19: [5] Deleted** 作成者

S

**Page 19: [5] Deleted** 作成者

**rate**

**Page 19: [6] Formatted** 作成者

Pattern: Clear (White)

**Page 19: [7] Formatted** 作成者

Pattern: Clear (White)

**Page 19: [8] Formatted** 作成者

Pattern: Clear (White)

**Page 19: [9] Formatted** 作成者

Centered

**Page 19: [10] Formatted** 作成者

Pattern: Clear (White)

|    |                                        |     |
|----|----------------------------------------|-----|
| 1  |                                        |     |
| 2  |                                        |     |
| 3  |                                        |     |
| 4  | <b>Page 19: [11] Formatted</b>         | 作成者 |
| 5  | Pattern: Clear (White)                 |     |
| 6  |                                        |     |
| 7  | <b>Page 19: [12] Formatted</b>         | 作成者 |
| 8  | Centered                               |     |
| 9  |                                        |     |
| 10 | <b>Page 19: [13] Formatted</b>         | 作成者 |
| 11 | Pattern: Clear (White)                 |     |
| 12 |                                        |     |
| 13 | <b>Page 19: [14] Formatted</b>         | 作成者 |
| 14 | Pattern: Clear (White)                 |     |
| 15 |                                        |     |
| 16 | <b>Page 19: [15] Formatted</b>         | 作成者 |
| 17 | Centered                               |     |
| 18 |                                        |     |
| 19 | <b>Page 19: [16] Formatted</b>         | 作成者 |
| 20 | Font: Not Bold                         |     |
| 21 |                                        |     |
| 22 | <b>Page 19: [17] Formatted</b>         | 作成者 |
| 23 | Font: Not Bold                         |     |
| 24 |                                        |     |
| 25 | <b>Page 19: [17] Formatted</b>         | 作成者 |
| 26 | Font: Not Bold, Pattern: Clear (White) |     |
| 27 |                                        |     |
| 28 | <b>Page 19: [18] Formatted</b>         | 作成者 |
| 29 | Superscript                            |     |
| 30 |                                        |     |
| 31 |                                        |     |
| 32 |                                        |     |
| 33 |                                        |     |
| 34 |                                        |     |
| 35 |                                        |     |
| 36 |                                        |     |
| 37 | <b>Page 20: [20] Deleted</b>           | 作成者 |
| 38 | <b>and the</b>                         |     |
| 39 |                                        |     |
| 40 |                                        |     |
| 41 | <b>Page 20: [20] Deleted</b>           | 作成者 |
| 42 | <b>vaccination</b>                     |     |
| 43 |                                        |     |
| 44 |                                        |     |
| 45 |                                        |     |
| 46 | <b>Page 20: [20] Deleted</b>           | 作成者 |
| 47 | <b>the development of</b>              |     |
| 48 |                                        |     |
| 49 |                                        |     |
| 50 | <b>Page 20: [20] Deleted</b>           | 作成者 |
| 51 | <b>events or death of any cause</b>    |     |
| 52 |                                        |     |
| 53 |                                        |     |
| 54 |                                        |     |
| 55 | <b>Page 20: [21] Deleted</b>           | 作成者 |
| 56 | -                                      |     |
| 57 |                                        |     |
| 58 | <b>Page 20: [21] Deleted</b>           | 作成者 |
| 59 |                                        |     |
| 60 |                                        |     |

1  
2  
3  
4  
5  
6  
7  
8  
9  
10  
11  
12  
13  
14  
15  
16  
17  
18  
19  
20  
21  
22  
23  
24  
25  
26  
27  
28  
29  
30  
31  
32  
33  
34  
35  
36  
37  
38  
39  
40  
41  
42  
43  
44  
45  
46  
47  
48  
49  
50  
51  
52  
53  
54  
55  
56  
57  
58  
59  
60

4.319

**Page 20: [22] Deleted**

作成者

-

**Page 20: [22] Deleted**

作成者

9.487

**Page 20: [23] Deleted**

作成者

1.779

**Page 20: [23] Deleted**

作成者

1.240 - 2.554

**Page 20: [24] Deleted**

作成者

0.900

**Page 20: [24] Deleted**

作成者

0.707 - 1.147

**Page 20: [25] Deleted**

作成者

2.761

**Page 20: [25] Deleted**

作成者

1.580 - 4.827

**Page 20: [26] Deleted**

作成者

1.473

**Page 20: [26] Deleted**

作成者

0.932 - 2.328

STROBE 2007 (v4) Statement—Checklist of items that should be included in reports of *cohort studies*

| Section/Topic                | Item # | Recommendation                                                                                                                                                                       | Reported on page # |
|------------------------------|--------|--------------------------------------------------------------------------------------------------------------------------------------------------------------------------------------|--------------------|
| Title and abstract           | 1      | (a) Indicate the study's design with a commonly used term in the title or the abstract                                                                                               | 1-4                |
|                              |        | (b) Provide in the abstract an informative and balanced summary of what was done and what was found                                                                                  | 3-5                |
| <b>Introduction</b>          |        |                                                                                                                                                                                      |                    |
| Background/rationale         | 2      | Explain the scientific background and rationale for the investigation being reported                                                                                                 | 5,6                |
| Objectives                   | 3      | State specific objectives, including any prespecified hypotheses                                                                                                                     | 5,6                |
| <b>Methods</b>               |        |                                                                                                                                                                                      |                    |
| Study design                 | 4      | Present key elements of study design early in the paper                                                                                                                              | 6,7                |
| Setting                      | 5      | Describe the setting, locations, and relevant dates, including periods of recruitment, exposure, follow-up, and data collection                                                      | 6-8                |
| Participants                 | 6      | (a) Give the eligibility criteria, and the sources and methods of selection of participants. Describe methods of follow-up                                                           | 6,7                |
|                              |        | (b) For matched studies, give matching criteria and number of exposed and unexposed                                                                                                  | 6,7,18             |
| Variables                    | 7      | Clearly define all outcomes, exposures, predictors, potential confounders, and effect modifiers. Give diagnostic criteria, if applicable                                             | 7,8                |
| Data sources/<br>measurement | 8*     | For each variable of interest, give sources of data and details of methods of assessment (measurement). Describe comparability of assessment methods if there is more than one group | 7-9                |
| Bias                         | 9      | Describe any efforts to address potential sources of bias                                                                                                                            | 7                  |
| Study size                   | 10     | Explain how the study size was arrived at                                                                                                                                            | 6                  |
| Quantitative variables       | 11     | Explain how quantitative variables were handled in the analyses. If applicable, describe which groupings were chosen and why                                                         | 8,9                |
| Statistical methods          | 12     | (a) Describe all statistical methods, including those used to control for confounding                                                                                                | 9,10               |
|                              |        | (b) Describe any methods used to examine subgroups and interactions                                                                                                                  | 9,10               |
|                              |        | (c) Explain how missing data were addressed                                                                                                                                          | NA                 |
|                              |        | (d) If applicable, explain how loss to follow-up was addressed                                                                                                                       | NA                 |
|                              |        | (e) Describe any sensitivity analyses                                                                                                                                                | NA                 |
| <b>Results</b>               |        |                                                                                                                                                                                      |                    |

|                          |     |                                                                                                                                                                                                              |             |
|--------------------------|-----|--------------------------------------------------------------------------------------------------------------------------------------------------------------------------------------------------------------|-------------|
| Participants             | 13* | (a) Report numbers of individuals at each stage of study—eg numbers potentially eligible, examined for eligibility, confirmed eligible, included in the study, completing follow-up, and analysed            | 10,18       |
|                          |     | (b) Give reasons for non-participation at each stage                                                                                                                                                         | NA          |
|                          |     | (c) Consider use of a flow diagram                                                                                                                                                                           | NA          |
| Descriptive data         | 14* | (a) Give characteristics of study participants (eg demographic, clinical, social) and information on exposures and potential confounders                                                                     | 10,18       |
|                          |     | (b) Indicate number of participants with missing data for each variable of interest                                                                                                                          | NA          |
|                          |     | (c) Summarise follow-up time (eg, average and total amount)                                                                                                                                                  | NA          |
| Outcome data             | 15* | Report numbers of outcome events or summary measures over time                                                                                                                                               | 10-12,18-20 |
| Main results             | 16  | (a) Give unadjusted estimates and, if applicable, confounder-adjusted estimates and their precision (eg, 95% confidence interval). Make clear which confounders were adjusted for and why they were included | 10-12,19,20 |
|                          |     | (b) Report category boundaries when continuous variables were categorized                                                                                                                                    | NA          |
|                          |     | (c) If relevant, consider translating estimates of relative risk into absolute risk for a meaningful time period                                                                                             | NA          |
| Other analyses           | 17  | Report other analyses done—eg analyses of subgroups and interactions, and sensitivity analyses                                                                                                               | 11,21       |
| <b>Discussion</b>        |     |                                                                                                                                                                                                              |             |
| Key results              | 18  | Summarise key results with reference to study objectives                                                                                                                                                     | 12,13       |
| <b>Limitations</b>       |     |                                                                                                                                                                                                              |             |
| Interpretation           | 20  | Give a cautious overall interpretation of results considering objectives, limitations, multiplicity of analyses, results from similar studies, and other relevant evidence                                   | 12-17       |
| Generalisability         | 21  | Discuss the generalisability (external validity) of the study results                                                                                                                                        | 13-14       |
| <b>Other information</b> |     |                                                                                                                                                                                                              |             |
| Funding                  | 22  | Give the source of funding and the role of the funders for the present study and, if applicable, for the original study on which the present article is based                                                | 22          |

\*Give information separately for cases and controls in case-control studies and, if applicable, for exposed and unexposed groups in cohort and cross-sectional studies.

**Note:** An Explanation and Elaboration article discusses each checklist item and gives methodological background and published examples of transparent reporting. The STROBE checklist is best used in conjunction with this article (freely available on the Web sites of PLoS Medicine at <http://www.plosmedicine.org/>, Annals of Internal Medicine at <http://www.annals.org/>, and Epidemiology at <http://www.epidem.com/>). Information on the STROBE Initiative is available at [www.strobe-statement.org](http://www.strobe-statement.org).

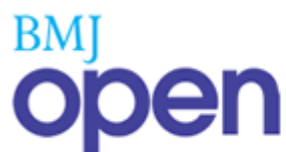

**Heterogeneity of the efficacy of the 23-valent pneumococcal polysaccharide vaccine caused by various underlying conditions of chronic pulmonary disease in elderly patients: Prospective cohort study**

|                               |                                                                                                                                                                                                                                                                            |
|-------------------------------|----------------------------------------------------------------------------------------------------------------------------------------------------------------------------------------------------------------------------------------------------------------------------|
| Journal:                      | <i>BMJ Open</i>                                                                                                                                                                                                                                                            |
| Manuscript ID:                | bmjopen-2011-000105.R2                                                                                                                                                                                                                                                     |
| Article Type:                 | Research                                                                                                                                                                                                                                                                   |
| Date Submitted by the Author: | 02-May-2011                                                                                                                                                                                                                                                                |
| Complete List of Authors:     | Inoue, Satoshi; Yokohama City University, Department of Epidemiology and Public Health<br>Watanuki, Yuji<br>Kaneko, Tetsuji<br>Sato, Takashi<br>Miyazawa, Naoki<br>Kaneko, Takeshi<br>Ishigatsubo, Yoshiaki<br>Morita, Satoshi<br>Natsumeda, Yutaka<br>Mizushima, Shunsaku |
| <b>Subject Heading</b>:       | Infectious diseases                                                                                                                                                                                                                                                        |
| Keywords:                     | Infection control < INFECTIOUS DISEASES, Respiratory infections < THORACIC MEDICINE, Adult thoracic medicine < THORACIC MEDICINE                                                                                                                                           |
|                               |                                                                                                                                                                                                                                                                            |

SCHOLARONE™  
Manuscripts

**Heterogeneity of the efficacy of the 23-valent pneumococcal polysaccharide vaccine caused by various underlying conditions of chronic pulmonary disease in elderly**

**patients: Prospective cohort study**

Satoshi Inoue,<sup>1,5</sup> Yuji Watanuki,<sup>2</sup> Tetsuji Kaneko,<sup>3</sup> Takashi Sato,<sup>2</sup> Naoki Miyazawa,<sup>2</sup> Takeshi Kaneko,<sup>4</sup> Yoshiaki Ishigatsubo,<sup>2</sup> Satoshi Morita,<sup>3</sup> Yutaka Natsumeda,<sup>5</sup> Shunsaku Mizushima,<sup>1</sup>

<sup>1</sup>Department of Epidemiology and Public Health, Yokohama City University Graduate School of Medicine, 3-9 Fukuura, Kanazawa-ku Yokohama 236-0004 Japan

<sup>2</sup>Department of Internal Medicine and Clinical Immunology, Yokohama City University Graduate School of Medicine, Yokohama, Japan

<sup>3</sup>Department of Biostatistics and Epidemiology, Yokohama City University Graduate School of Medicine, Yokohama, Japan

<sup>4</sup>Department of Pulmonary Medicine, Yokohama City University Graduate School of Medicine, Yokohama, Japan

<sup>5</sup>Department of Clinical Research, Yokohama City University Graduate School of Medicine, Yokohama, Japan

Corresponding author:

Satoshi Inoue, MD, PhD

Tel: 81-45-787-2610

Fax: 81-45-787-2609

E-mail: [ino999@yokohama-cu.ac.jp](mailto:ino999@yokohama-cu.ac.jp)

1  
2  
3  
4  
5  
6 Key word: PPV23, chronic pulmonary disease, elderly patient, respiratory infection  
7

8 Word count: 3262  
9  
10  
11  
12  
13  
14  
15  
16  
17  
18  
19  
20  
21  
22  
23  
24  
25  
26  
27  
28  
29  
30  
31  
32  
33  
34  
35  
36  
37  
38  
39  
40  
41  
42  
43  
44  
45  
46  
47  
48  
49  
50  
51  
52  
53  
54  
55  
56  
57  
58  
59  
60

For peer review only



## ABSTRACT

### Objective

To determine the ideal conditions for use of the 23-valent pneumococcal polysaccharide vaccine (PPV23) in elderly outpatients with chronic pulmonary diseases.

### Design

Prospective cohort study

### Participants

A total of 1,378 outpatients with chronic pulmonary diseases  $\geq 60$  years of age

### Intervention

Participants were educated about PPV23, and those who responded affirmatively were vaccinated between August and November 2002. The participants who chose no intervention served as controls. The pre-vaccine period was defined as August 2001 to August 2002. Participants were followed for 2 years from December 2002 or until death.

### Main outcome measures

Events of interest included the first episode of bacterial (including pneumococcal) pulmonary infection (primary endpoint) and death of any cause (secondary endpoint).

### Results

Frequent episodes of pulmonary infection during the pre-vaccine period significantly decreased event-free survival during the 2-year observation period ( $p < 0.001$ ). Chronic respiratory failure was associated with a decreased event-free survival only when the pulmonary infection episode did not occur in the pre-vaccine period ( $p < 0.001$ ). No significant differences in event-free survival were observed between the vaccinated and unvaccinated group during analysis of the entire cohort. In the Cox proportional hazards

1  
2  
3  
4  
5  
6 regression model, event-free survival decreased significantly when pulmonary infection  
7  
8 occurred in the pre-vaccine period. In the subgroup analysis, the first episode of  
9  
10 bacterial pulmonary infection (but not death of any cause) was reduced significantly by  
11  
12 PPV23 only in patients with chronic respiratory failure who had no episodes of  
13  
14 pulmonary infection during the pre-vaccine period ( $p = 0.019$ ).

### 17 **Conclusion**

18  
19 The efficacy of PPV23 against pulmonary infection and death of any cause might be  
20  
21 unachievable if pulmonary infection occurs during the pre-vaccine period. PPV23 needs  
22  
23 to be given to elderly patients with chronic pulmonary disease at an earlier time in  
24  
25 which infectious complications in the lung have not yet occurred.  
26  
27  
28  
29  
30  
31

### 32 **Summary**

#### 33 ● Article focus (hypothesis):

34  
35 The efficacy of PPV23 might be compromised by an episode of pulmonary infection in  
36  
37 the pre-vaccine period or chronic respiratory failure in elderly patients with chronic  
38  
39 pulmonary disease.  
40  
41  
42

#### 43 ● Key messages:

44  
45 1. The PPV23 efficacy might be unachievable if pulmonary infection occurs during the  
46  
47 pre-vaccine period.  
48  
49

50  
51 2. The episode of pulmonary infection could be prevented by PPV23 in elderly patients  
52  
53 with noninfectious complications such as chronic respiratory failure.  
54  
55

56  
57 3. Elderly patients with chronic pulmonary disease need to receive the PPV23  
58  
59 vaccination at an earlier time in which infectious complications in the lung have not yet  
60  
occurred.

● Strengths and limitations of this study:

1. Only participants who responded affirmatively received PPV23. They were not assigned randomly to a group.
2. The diagnosis of pneumococcal pulmonary disease was not made in the majority of patients who had pulmonary infection during the study period. The microbiological diagnosis in the lower respiratory tract, which is not normally sterile, is ambiguous.

## INTRODUCTION

*Streptococcus pneumoniae* continues to be one of the main causative pathogens in community-acquired pneumonia and meningitis.[1-2] Due to the high mortality rate of *S. pneumoniae* infections, especially in elderly and very young patients, prophylactic use of 23-valent pneumococcal polysaccharide vaccine (PPV23) is recommended for people at an increased risk of pneumococcal disease in developed countries.[3-7] The efficacy of PPV23, however, remains controversial. Despite the fact that the results of pre- and post-licensed trials in immunocompetent people were supportive of regulatory approval of vaccine use, clinical studies in elderly or young adults with comorbidities in developed countries produced little convincing evidence of effectiveness against a common manifestation of pneumococcal infections such as pneumonia.[8-12] A retrospective study conducted in 1999 suggested that PPV23 was associated with significant reductions in hospitalisation and mortality rates of elderly patients with chronic lung disease and contributed to medical care cost savings, although meta-analytical reviews published thereafter failed to show statistically significant evidence of the protective effects of PPV23 against the development of pneumonia in elderly patients with chronic illnesses.[13-15]

1  
2  
3  
4  
5  
6 We previously reported a 2-year cohort clinical study of elderly outpatients with  
7  
8 chronic pulmonary disease to investigate the prophylactic effects of PPV23 on bacterial  
9  
10 and pneumococcal pulmonary infection onset and outcome.[16] Analysis of the  
11  
12 comparison between the vaccinated and unvaccinated group showed a decline in the  
13  
14 incidence of bacterial pulmonary infection only in the vaccinated group. This result  
15  
16 might be associated with PPV23 effectiveness, although detailed background  
17  
18 information regarding underlying pulmonary conditions was not provided. Subgroup  
19  
20 analysis needs to be carried out since chronic pulmonary disease includes various  
21  
22 clinical and pathophysiological pictures. Underlying pulmonary diseases could cause  
23  
24 chronic respiratory failure if repeatedly complicated by lung infections, and such  
25  
26 heterogeneity may generate different outcomes after vaccination.[17] We decided to  
27  
28 reanalyse the data to study the influence of clinical background during the pre-vaccine  
29  
30 period on PPV23 efficacy in elderly patients with chronic pulmonary disease.  
31  
32  
33  
34  
35  
36  
37  
38

## 39 **METHODS**

### 40 **Study population**

41  
42 All the outpatients  $\geq 60$  years of age (a total of 1,378 participants at the start of the  
43  
44 study) with chronic pulmonary disease in the Kanagawa Cardiovascular and Respiratory  
45  
46 Diseases Centre were included in this study. These patients were informed of the  
47  
48 prophylactic effects of PPV23 on infectious pulmonary exacerbations. Chronic  
49  
50 pulmonary diseases in this study included bronchial asthma, chronic pulmonary  
51  
52 emphysema, old tuberculosis, chronic bronchitis, bronchiectasis, nontuberculous  
53  
54 mycobacteria, and others (Table 1). Patients who presented with a fever ( $\geq 37.5$  °C) were  
55  
56 excluded from the study according to the Preventive Vaccination Law issued by the  
57  
58  
59  
60

1  
2  
3  
4  
5  
6 Japanese Ministry of Health, Labour and Welfare. Once the clinical status of these  
7  
8 patients became stable, they were invited to participate in the study. Home oxygen  
9  
10 therapy (HOT) had been prescribed according to the Japanese Respiratory Society (JRS)  
11  
12 Guidelines for 97 participants with chronic respiratory failure upon study initiation  
13  
14 (Table 1), but no patients were newly prescribed HOT during the observation period.  
15  
16

### 17 18 19 20 **Study design**

21  
22 We did not adopt a randomised controlled study design since the PPV23 vaccination is  
23  
24 considered a part of standard care in many developed countries. Additionally, some  
25  
26 elderly participants with chronic pulmonary disease were in an immunocompromised  
27  
28 status; therefore, a randomised controlled study of vaccine effectiveness may violate  
29  
30 ethical principles and human rights. Written informed consent forms were obtained from  
31  
32 all participants. To avoid selection bias, doctors and other medical staffs were not  
33  
34 allowed to assign patients to the vaccine or non-vaccine group; instead, individual  
35  
36 patients decided whether or not to be vaccinated. The same form, which included an  
37  
38 explanation of the study, was provided to all the participants. A total of 647 patients  
39  
40 were injected with PPV23 (Pneumovax, Merck, NJ, USA) intramuscularly into their  
41  
42 non-dominant upper arm with between August and November 2002. The pre-vaccine  
43  
44 period was defined as 1 year prior to PPV23 vaccination (August 2001 to July 2002).  
45  
46  
47  
48  
49  
50  
51  
52

### 53 **Data collection**

54  
55 Participants were followed from December 2002 to the end of the study in November  
56  
57 2004 (for 2 years) or until death in the clinic approximately every 2 months as long as  
58  
59 clinical status remained stable. A diagnosis of pulmonary infection was made by  
60

1  
2  
3  
4  
5  
6 respiratory physicians according to the Japanese Respiratory Society Guidelines for the  
7  
8 Management of Community-Acquired Pneumonia in Adults. In brief, pulmonary  
9  
10 infection was suspected if more than 2 of the following criteria were present:  
11  
12 temperature  $\geq 37.0$  °C, white blood cell count  $> 8,000/\text{mm}^3$ , and C-reactive protein  $>$   
13  
14 0.7 mg/dl. A diagnosis of pneumonia was made when chest radiographs revealed  
15  
16 alveolar opacities. If a cough with yellow sputum production was observed in the  
17  
18 absence of the alveolar opacities on the chest radiograph, the patients were diagnosed  
19  
20 with acute bronchitis or exacerbation of chronic bronchitis. It was very difficult to  
21  
22 clearly distinguish pneumonia from acute bronchitis or an acute exacerbation of chronic  
23  
24 bronchitis in some patients since there were considerable clinical overlaps between  
25  
26 these illnesses including the symptoms, blood test results, causative pathogens, and  
27  
28 antibiotic treatment. Hence, pulmonary infection was expressed as a dichotomous  
29  
30 variable.  
31  
32  
33  
34  
35

36 A diagnosis of pneumococcal pulmonary infection was made if *Streptococcus*  
37  
38 *pneumoniae* was the dominant organism stained with Gram stain in the sputum smear or  
39  
40 if the sputum culture was positive ( $> 10^7$  colony forming units/ml). When *S.*  
41  
42 *pneumoniae* was not identified, patients were diagnosed with a pulmonary infection  
43  
44 caused by an identified pathogen or with a bacterial pulmonary infection if no possible  
45  
46 causative pathogen was detected but if the clinical data were highly suggestive of  
47  
48 bacterial infection in the lung. Empirical antibiotic therapy was started in all the patients  
49  
50 promptly once clinical data sufficient to satisfy the definition of pulmonary infection  
51  
52 were obtained. The initial treatment was replaced by second-line therapy of antibiotics  
53  
54 chosen according to the sensitivity results.  
55  
56  
57  
58  
59  
60

### Event of interest

We hypothesised that repeated pulmonary infection and concomitant gradual loss of lung function might be related to a reduced PPV23 efficacy. Participants were grouped based on these factors: frequency of infectious (including pneumococcal) pulmonary infection episode within 1 year prior to the PPV23 vaccination (0 episodes, 1 episode, and >1 episode), and chronic respiratory failure represented by HOT usage. Events of interest included the first episode of bacterial or pneumococcal pulmonary infection (pneumonia, acute bronchitis, or exacerbation of chronic bronchitis) where antibiotic treatment was required (primary endpoint), and death of any cause (secondary endpoint). The case of death with missing values was not counted as an event of interest but was included in the mortality rate.

### Statistical analysis

Differences in event-free survival were depicted with Kaplan-Meier curves, and the log-rank test was applied for analysis. The primary and secondary endpoints (the first episode of pulmonary infection and death of any cause, respectively) were analysed separately. Cross-tabulated data were compared by the Wilcoxon test or the Pearson's chi-square test. Relative risks for the events were estimated using the Cox proportional hazards regression model. The covariates used in the analysis were: (1) pulmonary infection during the pre-vaccine period, (2) chronic respiratory failure, and (3) PPV23 vaccination. For further analysis, gender and age were added as covariates and the data were analyzed. No any other variables were regarded as covariates in relation to event-free survival. The PASW statistics 18 (SPSS Inc. IL, USA) and SAS software (SAS Institute Inc. NC, USA) were used for the statistical analysis.

## RESULTS

Participant characteristics are shown in Table 1. Significant reductions in vaccination rate, age, and frequency of chronic respiratory failure were observed in the group without pulmonary infection during the pre-vaccine period compared with the other 2 groups with at least 1 episode of infectious lung complications. No significant gender difference was seen among groups.

The effects of underlying pulmonary conditions on event occurrences were analysed before PPV23 effectiveness were evaluated. Event-free survival in the Kaplan-Meier method dropped significantly as the frequency of pulmonary infection in the pre-vaccine period increased: the first episode of pulmonary infection, Figure 1; death of any cause, Supplemental Figure A. Chronic respiratory failure was associated with a significant decrease in event-free survival only in the absence of pulmonary infection in the pre-vaccine period: the first episode of pulmonary infection, Supplemental Figure B, Table 2; death of any cause, Supplemental Figure C, Supplemental Table A.

Participants were not randomly assigned to groups; vaccination was chosen or declined by each individual. As a result, the number of vaccinated patients was significantly higher than the number of unvaccinated patients when pulmonary infection occurred during the pre-vaccine period (Table 1). No significant PPV23 effectiveness against the development of first episode of pulmonary infection during the observation period was seen between the vaccinated and unvaccinated group in the Kaplan-Meier method (Supplemental Figure D). The mortality rate was, however, significantly high in the vaccinated group (Supplemental Figure E). This result may be misleading due to the vaccination imbalance among groups. In the Cox proportional hazards regression model



1  
2  
3  
4  
5 applied for covariate adjustment, no hazardous effects of PPV23 on the incidence or  
6 timing of the first episode of pulmonary infection or death of any cause were observed.  
7  
8 The hazard ratio for the first episode of pulmonary infection or death of any cause  
9  
10 increased significantly due to some covariates such as pulmonary infection during the  
11 pre-vaccine period and chronic respiratory failure. Other covariates including gender,  
12 and age were not associated with the first episode of pulmonary infection but were  
13 associated with death of any cause (Table 3). The cause of death (n = 85) among all the  
14 participants during the observation period was shown in Supplemental Table B.  
15  
16  
17  
18  
19  
20  
21  
22  
23

24  
25 A subgroup analysis was performed to find the ideal condition for PPV23 use in  
26 elderly patients with chronic pulmonary disease. There are no significant differences in  
27 pulmonary infection-free survival between vaccinated and unvaccinated patients when  
28 grouped only by frequency of pulmonary infection in the pre-vaccine period (not  
29 shown). Pulmonary infection-free survival was somewhat improved when patients with  
30 chronic respiratory failure were vaccinated ( $p = 0.078$ ). This effectiveness became  
31 significant when patients who had at least 1 episode of pulmonary infection in the  
32 pre-vaccine period were excluded (Figure 2) (Table 4). The mortality was not reduced  
33 by PPV23 in patients with chronic respiratory failure who had no episodes of  
34 pulmonary infection during the pre-vaccine period (Supplemental Figure F). The cause  
35 of death (n = 9) among patients with chronic respiratory failure who had no episodes of  
36 pulmonary infection during the pre-vaccine period was as follows: chronic respiratory  
37 failure, 2; cerebrovascular disease, 2; and unknown, 1 in vaccinated patients and chronic  
38 respiratory failure, 2; lung cancer, 1; and unknown, 1 in unvaccinated patients. In this  
39 group, PPV23 was shown to have an effect on the first episode of pulmonary infection  
40 but it did not reduce the number of deaths due to any cause.  
41  
42  
43  
44  
45  
46  
47  
48  
49  
50  
51  
52  
53  
54  
55  
56  
57  
58  
59  
60

1  
2  
3  
4  
5  
6 There were only 29 pneumococcal pulmonary infection during the observation  
7  
8 period (pneumococcal pulmonary infection, 22; death, 7; Supplemental Table C). The  
9  
10 pneumococcal pneumonia-free survival decreased significantly in the presence of  
11  
12 pulmonary infection during the pre-vaccine period ( $p < 0.001$ ; Supplemental Figure G).  
13  
14 No effects of chronic respiratory failure on pneumococcal pneumonia-free survival were  
15  
16 observed ( $p = 0.196$ ). PPV23 vaccination did not show significant protective effects  
17  
18 against the development of pneumococcal pneumonia (Supplemental Figure H).  
19  
20  
21  
22  
23

## 24 **DISCUSSION**

25  
26 The effects of the PPV23 vaccination on elderly patients with chronic pulmonary  
27  
28 disease varied in accordance with the frequency of lung infection episodes and the  
29  
30 presence of chronic respiratory failure during the pre-vaccine period. Our findings  
31  
32 suggest the following: PPV23 vaccination might work effectively unless previous lung  
33  
34 infection episodes had occurred; and subgroup analysis of the underlying disease  
35  
36 associated with pneumococcal complications might be useful for finding the possible  
37  
38 ideal conditions for PPV23 use. To our knowledge, this is the first report to characterise  
39  
40 PPV23 effectiveness due to the heterogeneity of underlying lung conditions such as the  
41  
42 presence of pulmonary infection episodes prior to vaccination or chronic pulmonary  
43  
44 failure in elderly patients with chronic pulmonary disease.  
45  
46  
47  
48  
49  
50  
51  
52

### 53 **Comparison with other studies**

54  
55 Previous pulmonary infection was highly associated with poor clinical prognosis. This  
56  
57 finding suggests that beneficial PPV23 effectiveness might be unachievable for elderly  
58  
59 people with chronic pulmonary disease in the presence of infectious complications  
60

1  
2  
3  
4  
5  
6 during the pre-vaccine period. In a multicentre double-blind controlled study conducted  
7  
8 in Sweden, PPV23 was not efficacious against overall pneumonia in middle or elderly  
9  
10 non-immunocompromised individuals who had been treated for community-acquired  
11  
12 pneumonia.[18] In that study, the survival rate calculated by the Kaplan-Meier method  
13  
14 was still >80% in both vaccinated and unvaccinated populations after 2-year  
15  
16 observation, while our results showed that the survival rate was <60% if episodes of  
17  
18 pulmonary infection had occurred within 1 year prior to vaccination. These results are  
19  
20 consistent with previous suggestions that chronic pulmonary disease such as chronic  
21  
22 obstructive pulmonary disease (COPD) is a risk factor for repeated pneumonia and that  
23  
24 protective effects of PPV23 could not be obtained.[19-21] Conflicting results were  
25  
26 shown in some other reports in which the beneficial effects of PPV23 in patients with  
27  
28 COPD were indicated, although previous episodes of pneumonia prior to vaccination  
29  
30 were not considered and participants were not limited to the elderly.[13, 22] Alfageme  
31  
32 et al showed PPV23 effectiveness in patients <65 years of age with COPD in a  
33  
34 randomised controlled study in 596 patients.[23] These results and our data indicate that  
35  
36 PPV23 might be inefficacious on the elderly population with chronic pulmonary disease  
37  
38 especially when complicated by lung infection prior to the vaccination. Despite the  
39  
40 strong evidence of PPV23 efficacy against invasive pneumococcal disease (IPD),  
41  
42 altered immune response, disruption of a physical barrier in the airways due to  
43  
44 progressive chronic pulmonary disease, and repeated pulmonary infection could  
45  
46 compromise the benefits.[1, 24] PPV23 vaccination should be given to patients with  
47  
48 chronic pulmonary disease at an earlier stage in which infectious complications have not  
49  
50 yet occurred.  
51  
52  
53  
54  
55  
56  
57  
58  
59  
60

The probability of survival was significantly increased by PPV23 in the presence of

1  
2  
3  
4  
5  
6 chronic respiratory failure in patients without episodes of pulmonary infection during  
7  
8 the pre-vaccine period. The pulmonary infection-free survival rate was 75.5% at the end  
9  
10 of the observation period when PPV23 was given. Without PPV23, survival was  
11  
12 reduced to 45.0%, almost the same level as that in the case where infectious lung  
13  
14 complications had occurred during the pre-vaccine period. This result indicates that  
15  
16 pulmonary infection due to chronic respiratory failure could be prevented by the PPV23  
17  
18 vaccination. Oxygen therapy and inhalation therapy containing corticosteroids may be  
19  
20 administered in COPD patients when airflow is severe and chronic respiratory failure is  
21  
22 present, but these treatments were suggested to be risk factors for community-acquired  
23  
24 pneumonia.[25-27] Additionally, bacterial colonisation of the distal airway may occur  
25  
26 due to the altered pulmonary defense.[24] We suggest that patients receive the PPV23  
27  
28 vaccination soon after the diagnosis of chronic respiratory disease such as COPD,  
29  
30 especially when maintenance treatments for impaired lung function are expected to be  
31  
32 risk factors for pneumonia. In this study, the number of participants with chronic  
33  
34 respiratory failure who were free of lung infections during the pre-vaccine period was  
35  
36 only 70. Thus, a large scale study is warranted.  
37  
38  
39  
40  
41  
42  
43  
44  
45

#### 46 **Strengths and limitations of the study**

47  
48 When informed consents were obtained prior to the study initiation, PPV23 vaccine  
49  
50 recommendations were made and only participants who responded affirmatively  
51  
52 received the vaccination. This method may be associated with these results: the  
53  
54 vaccination rate increased significantly in high-risk patients who had at least 1 episode  
55  
56 of bacterial pulmonary infection during the pre-vaccine period or chronic respiratory  
57  
58 failure; and the mortality rate was higher in vaccinated patients, although the presence  
59  
60

1  
2  
3  
4  
5  
6 of adverse effects of PPV23 is unlikely because PPV23 had generally been considered  
7  
8 safe based on clinical experience since 1977.[7] In the Cox proportional hazards model,  
9  
10 PPV23 was not a risk factor for the events. All of the participants in this study were  
11  
12 elderly patients with chronic pulmonary disease, and all of them could be categorised  
13  
14 into groups for which PPV23 vaccination is recommended in the United States and  
15  
16 some European countries.[3, 7, 14] In Japan, no vaccine recommendations against  
17  
18 pneumococcal infection are issued by the Japanese Ministry of Health, Labour and  
19  
20 Welfare.[11] Japanese participants need to accept some risks for the public benefit and  
21  
22 not for their own if selected for the unvaccinated group. This condition is different from  
23  
24 that in some developed countries where unvaccinated control subjects in clinical trials  
25  
26 of the PPV23 vaccine could still be protected by previous vaccination and indirect  
27  
28 immunity from other people, including children.[28-30] Pneumococcal infection was  
29  
30 associated with increasing mortality rates, while the beneficial effects of PPV23 without  
31  
32 any severe adverse events were suggested in some previous clinical trials.[1, 8, 15,  
33  
34 31-32] Therefore, we decided to conduct a nonrandomised clinical study to ensure that  
35  
36 participants were treated with respect and dignity.  
37  
38  
39  
40  
41  
42

43  
44 The doctors had access to the patients' vaccination record during the observation  
45  
46 period. However, at the time of this study, PPV23 had already been approved by the  
47  
48 Japanese Ministry of Health, Labour and Welfare, and there were no conflicts of interest  
49  
50 with pharmaceutical companies. All the treatments were supported by the public health  
51  
52 care system funded by the Japanese government; no specific grants were provided from  
53  
54 any funding agencies. Diagnosis of pulmonary infection was made according to the  
55  
56 same diagnostic criteria. Therefore it is unlikely that treatment bias occurred during the  
57  
58 observation period.  
59  
60

1  
2  
3  
4  
5  
6 The diagnosis of pneumococcal disease was not made in the majority of patients  
7  
8 who had pulmonary infections during the observation period. Identification of *S.*  
9  
10 *pneumoniae* using a sputum Gram stain is required for definitive diagnosis. However,  
11  
12 compared to IPD defined as any condition in which *S. pneumonia* is identified in a  
13  
14 normally sterile body site, microbiological diagnosis in the lower respiratory tract is  
15  
16 ambiguous.[1, 5] It was noted by many authors that respiratory secretion samples for  
17  
18 pneumococcal identification might be unreliable due to the technical difficulties in  
19  
20 obtaining good-quality sputum and in distinguishing causative specimens from  
21  
22 colonisation.[21] The positive results in urine antigen testing might be related to  
23  
24 previous infection or colonisation.[33] It might be difficult to assess PPV23  
25  
26 effectiveness on pneumococcal pulmonary infection using these procedures. Blood  
27  
28 cultures are recommended for patients hospitalised after a diagnosis of  
29  
30 community-acquired pneumonia, although its cost-effectiveness has been questioned in  
31  
32 several studies.[34] Less expensive, novel techniques for accurate diagnosis of  
33  
34 pneumonia need to be developed.  
35  
36  
37  
38  
39  
40  
41  
42

### 43 **Conclusions and policy implications**

44  
45 Our data demonstrated that the beneficial effects of the PPV23 vaccination may not be  
46  
47 obtainable if an episode of pulmonary infection occurred during the pre-vaccine period  
48  
49 in elderly patients with chronic pulmonary disease. We suggest that PPV23 needs to be  
50  
51 given soon after chronic pulmonary disease is diagnosed. In developed countries,  
52  
53 including Japan, elderly populations with chronic pulmonary disease are growing in  
54  
55 number. The Japanese Ministry of Health, Labour and Welfare should introduce the  
56  
57 PPV23 vaccination for patients with chronic pulmonary disease and in routine  
58  
59  
60

1  
2  
3  
4  
5  
6 vaccination of children along with pneumococcal conjugate vaccine that could provide  
7  
8 indirect beneficial effects to the population in whom PPV23 efficacy may not be  
9  
10 expected.  
11  
12  
13  
14  
15  
16  
17  
18  
19  
20  
21  
22  
23  
24  
25  
26  
27  
28  
29  
30  
31  
32  
33  
34  
35  
36  
37  
38  
39  
40  
41  
42  
43  
44  
45  
46  
47  
48  
49  
50  
51  
52  
53  
54  
55  
56  
57  
58  
59  
60

For peer review only

**Table 1: Baseline characteristics of 1378 outpatients with chronic pulmonary disease**

|                              | Frequency of pulmonary infection during the pre-vaccine period |                |                | P Value <sup>†</sup> |
|------------------------------|----------------------------------------------------------------|----------------|----------------|----------------------|
|                              | 0<br>(n = 1164)                                                | 1<br>(n = 167) | >1<br>(n = 43) |                      |
| Age                          |                                                                |                |                |                      |
| Mean ± SD                    | 71.3 ± 7.0                                                     | 73.3 ± 6.9     | 73.0 ± 7.0     | < 0.001              |
| Median                       | 71                                                             | 73             | 73             |                      |
| Male                         | 626 (53.8%)                                                    | 98 (58.7%)     | 27 (62.8%)     | 0.272                |
| Female                       | 538 (46.2%)                                                    | 69 (41.3%)     | 16 (37.2%)     |                      |
| Chronic respiratory disease* |                                                                |                |                |                      |
| Bronchial asthma             | 517                                                            | 59             | 16             |                      |
| Chronic pulmonary emphysema  | 197                                                            | 40             | 14             |                      |
| Old tuberculosis             | 157                                                            | 33             | 10             |                      |
| Chronic bronchitis           | 106                                                            | 18             | 5              |                      |
| Interstitial pneumonia       | 100                                                            | 9              | 0              |                      |
| Non-tuberculous mycobacteria | 84                                                             | 10             | 2              |                      |
| Bronchioectasis              | 31                                                             | 13             | 5              |                      |
| Others                       | 103                                                            | 15             | 4              |                      |
| PPV23-vaccinated             | 512 (44.0%)                                                    | 109 (65.3%)    | 25 (58.1%)     | < 0.001              |
| PPV23-unvaccinated           | 652 (56.0%)                                                    | 58 (34.7%)     | 18 (41.9%)     |                      |
| Chronic respiratory failure  |                                                                |                |                |                      |
| +                            | 70 (6.0%)                                                      | 20 (12.0%)     | 7 (16.3%)      | < 0.001              |
| -                            | 1094 (94.0%)                                                   | 147 (88.0%)    | 36 (83.7%)     |                      |

\*Some patients were diagnosed as having more than one chronic respiratory disease.

<sup>†</sup>Data was analyzed using the Wilcoxon test or the Pearson's test.



**Table 2: The effects of pulmonary infection during the pre-vaccine period and chronic respiratory failure on pulmonary infection-free survival after PPV23 vaccination**

| Frequency of pulmonary infection during the pre-vaccine period | Chronic respiratory failure | N    | event* | Pulmonary infection-free survival at the end of the study* | 95%CI         | P value † |
|----------------------------------------------------------------|-----------------------------|------|--------|------------------------------------------------------------|---------------|-----------|
| 0                                                              | (-)                         | 1094 | 154    | 0.840                                                      | 0.816 – 0.864 | <0.001    |
| 0                                                              | (+)                         | 70   | 19     | 0.653                                                      | 0.525 – 0.781 |           |
| 1                                                              | (-)                         | 147  | 59     | 0.550                                                      | 0.462 – 0.638 | 0.506     |
| 1                                                              | (+)                         | 20   | 10     | 0.409                                                      | 0.168 – 0.649 |           |
| >1                                                             | (-)                         | 36   | 25     | 0.315                                                      | 0.161 – 0.469 | 0.348     |
| >1                                                             | (+)                         | 7    | 6      | 0.143                                                      | 0.000 – 0.402 |           |

\*Event represented the number of patients who were diagnosed with pulmonary infection during the observation period.

† Data was analyzed using the log-rank test.

**Table 3: Association of the frequency of pulmonary infection during the pre-vaccine period, chronic respiratory failure, PPV23, gender and age with the first episode of pulmonary infection or death of any cause**

|                                                                            | Hazard ratio | 95% CI        | P Value |
|----------------------------------------------------------------------------|--------------|---------------|---------|
| <b>Covariates for the risk of the first episode of pulmonary infection</b> |              |               |         |
| <b>Pulmonary infection during the pre-vaccine period</b>                   |              |               |         |
| <b>1 episode</b>                                                           | 3.251*       | 2.436 – 4.338 | <0.001  |
| <b>&gt;1 episode</b>                                                       | 6.480*       | 4.380 – 9.589 | <0.001  |
| <b>Chronic respiratory failure</b>                                         | 1.767        | 1.227 – 2.546 | 0.002   |
| <b>PPV23 vaccination</b>                                                   | 1.096        | 0.848 – 1.416 | 0.396   |
| <b>Gender</b>                                                              | 0.911        | 0.712 – 1.166 | 0.457   |
| <b>Age</b>                                                                 | 0.994        | 0.976 – 1.013 | 0.553   |
| <b>Covariates for the risk of death of any cause</b>                       |              |               |         |
| <b>Pulmonary infection during the pre-vaccine period</b>                   |              |               |         |
| <b>1 episode</b>                                                           | 2.289*       | 1.380 – 3.797 | 0.001   |
| <b>&gt;1 episode</b>                                                       | 3.134*       | 1.486 – 6.612 | 0.003   |
| <b>Chronic respiratory failure</b>                                         | 2.152        | 1.234 – 3.752 | 0.007   |
| <b>PPV23 vaccination</b>                                                   | 0.795        | 0.499 – 1.264 | 0.332   |
| <b>Gender</b>                                                              | 0.340        | 0.199 – 0.580 | <0.001  |
| <b>Age</b>                                                                 | 1.040        | 1.008 – 1.072 | 0.014   |

\*Hazard ratio was estimated in relative to the case of outpatients with no episode of pulmonary infection during the pre-vaccine period.

**Table 4: The influence of pulmonary infection during the pre-vaccine period and chronic respiratory failure on the PPV23 vaccine efficacy**

| Frequency of pulmonary infection during the pre-vaccine period | Chronic respiratory failure | Vaccinated* | Unvaccinated* | P Value <sup>†</sup> |
|----------------------------------------------------------------|-----------------------------|-------------|---------------|----------------------|
| (-)                                                            | (-)                         | 0.846 (465) | 0.836 (629)   | 0.931                |
|                                                                | (+)                         | 0.755 (47)  | 0.450 (23)    | 0.019                |
| 1 episode                                                      | (-)                         | 0.557 (92)  | 0.490 (55)    | 0.665                |
|                                                                | (+)                         | 0.431 (17)  | 0.333 (3)     | 0.876                |
| >1 episode                                                     | (-)                         | 0.317 (22)  | 0.214 (13)    | 0.200                |
|                                                                | (+)                         | 0.000 (3)   | 0.250 (4)     | 0.093                |

\*Data represented the pulmonary infection-free survival (%) at the end of the study (2 years after PPV23 vaccination). Numbers in parenthesis indicate numbers of patients.

<sup>†</sup>Data was analyzed using the log-rank test.

1  
2  
3  
4  
5  
6 **Contributions:** SI was responsible for interpretation of the data, and drafted, revised the  
7 manuscript. YW was responsible for study design, collection and interpretation of the  
8 data. TK and SM provided statistical support including analysis of the data and training  
9 in the use of statistical software. TK and SM also drafted the statistical analysis part in  
10 the manuscript. TS, NM, TK and YI helped interpreting the findings and contributed to  
11 critical revision of the drafted manuscript, particularly regarding pulmonary infection  
12 issues. YN and SM helped interpreting the data, provided very useful suggestion  
13 regarding immunization and public health policy, and revised the drafted manuscript.  
14 All authors approved the final version of the manuscript.  
15  
16  
17  
18  
19  
20  
21  
22  
23  
24  
25

26  
27 **Funding:** This research received no specific grants from any funding agencies in the  
28 public, commercial or not-for-profit sectors.  
29

30  
31 **Competing interests:** None declared.  
32

33  
34 **Ethical approval:** Full approval of Institutional Review Board in the Kanagawa  
35 Cardiovascular and Respiratory Diseases Centre was obtained prior to the study  
36 initiation.  
37  
38  
39

40  
41 **Data sharing:** No additional data available.  
42

#### 43 **Acknowledgement**

44  
45 The material (clinical data) that had been used for ref. 14 is modified and printed with  
46 the permission of the ©European Respiratory Society.  
47  
48  
49

#### 50 **Copyright license statement**

51  
52 The Corresponding Author has the right to grant on behalf of all authors and does grant  
53 on behalf of all authors, an exclusive license (or non-exclusive for UK Crown  
54 Employees) on a worldwide basis to the BMJ Publishing Group Ltd, and its Licensees  
55  
56  
57  
58  
59  
60

1  
2  
3  
4  
5  
6 to permit this article (if accepted) to be published in BMJ Open and any other BMJPG  
7  
8 products and to exploit all subsidiary rights, as set out in our license.”  
9

## 10 11 12 13 14 15 **References**

- 16  
17 1 Moberley S, Holden J, Tantham DP, et al. Vaccines for preventing pneumococcal  
18 infection in adults. *Cochrane Database (Review)* 2008 (1):CD000422.  
19  
20 2 Heather E, Hsu MPH, Kathleen A, et al. Effects of pneumococcal conjugate vaccine  
21 on pneumococcal meningitis. *N Engl J Med* 2009;360:244-56.  
22  
23 3 CDC. Updated recommendations for prevention of invasive pneumococcal disease  
24 among adults using the 23-valent pneumococcal polysaccharide vaccine (PPSV23).  
25  
26 *Morb Mortal Wkly Rep* 2010;59:34.  
27  
28 4 Vila-Corcoles A, Ochoa-Gondar O, Guzman JA, et al. Effectiveness of the 23-valent  
29 pneumococcal polysaccharide vaccine against invasive pneumococcal disease in people  
30 60 years or older. *BMC Infect Dis* 2010;10:73.  
31  
32 5 World Health Organization. 23-valent pneumococcal polysaccharide vaccine WHO  
33 position paper. *Wkly Epidemiol Rep* 2008;83:373-84.  
34  
35 6 Smith FE, Mann JM. Pneumococcal pneumonia: Experience in a community  
36 hospital. *West J Med* 1982;136:1-5.  
37  
38 7 CDC. Prevention of pneumococcal disease: recommendations of the advisory  
39 committee on immunization practices (ACIP). *Wkly Epidemiol Rep* 1997;46:RR-8.  
40  
41 8 Jackson LA, Neuzil KM, Yu O, et al. Effectiveness  
42 of pneumococcal polysaccharide vaccine in older adults. *N Engl J Med*  
43  
44 2003;348:1747-55.  
45  
46  
47  
48  
49  
50  
51  
52  
53  
54  
55  
56  
57  
58  
59  
60

1  
2  
3  
4  
5  
6 9 Andrews R, Moberley SA. The controversy of the efficacy of pneumococcal vaccine.

7  
8 *Can Med Assoc J* 2009;180:18-19.

9  
10 10 Fine MJ, Smith MA, Carson CA, et al. Efficacy of pneumococcal vaccination in  
11  
12 adults. *Arch Intern Med* 1994;154:2666-77.

13  
14 11 Maruyama T, Taguchi O, Niederman MS, et al. Efficacy of 23-valent pneumococcal  
15  
16 vaccine in preventing pneumonia and improving survival in nursing home residents:  
17  
18 double-blind, randomized and placebo controlled trial. *BMJ* 2010;340:c1004.

19  
20 12 Pedersen RH, Lohse N, Ostergaard L, et al. The effectiveness of pneumococcal  
21  
22 polysaccharide vaccination in HIV-infected adults: a systematic review. *HIV*  
23  
24 *Med*:DOI:10.1111/j.1468-1293.2010.00892.x.

25  
26 13 Nichol KL, Backen L, Wuorenma J, et al. The health and economic benefits  
27  
28 associated with pneumococcal vaccination of elderly persons with chronic lung disease.  
29  
30  
31  
32  
33 *Arch Intern Med* 1999;159:2437-42.

34  
35 14 Huss A, Scott P, Stuck AE, et al. Efficacy of pneumococcal vaccination in adults:  
36  
37 meta-analysis. *Can Med Assoc J* 2009;180:48-58.

38  
39 15 Moore RA, Wiffen PJ, Lipsky BA. Are the pneumococcal polysaccharide vaccines  
40  
41 effective? Meta-analysis of the prospective trials. *BMC Famil Pract* 2000;1:1.

42  
43 16 Watanuki Y, Miyazawa N, Kudo M, et al. Effects of pneumococcal vaccine in  
44  
45 patients with chronic respiratory disease. *Eur Respir Rev* 2008;17:43-5.

46  
47 17 Molinos L, Clemente MG, Miranda B, et al. Community-acquired pneumonia in  
48  
49 patients with and without chronic obstructive pulmonary disease. *J Infec*  
50  
51  
52  
53  
54  
55 2009;58:417-24.

56  
57 18 Ortqvist A, Hedlund J, Burman LA, et al. Randomised trial of 23-valent  
58  
59 pneumococcal capsular polysaccharide vaccine in prevention of pneumonia in  
60

1  
2  
3  
4  
5  
6 middle-aged and elderly people. *Lancet* 1998;351:399-403.

7  
8 19 Leech JA, Gervais A, Ruben FL. Efficacy of pneumococcal vaccine in severe  
9  
10 chronic obstructive pulmonary disease. *Can Med Assoc J* 1987;136:361-5.

11  
12 20 Davis AL, Aranda CP, Schiffman G, et al. Pneumococcal infection and immunologic  
13  
14 response to pneumococcal vaccine in chronic obstructive pulmonary disease. *Chest*  
15  
16 1987;92:204-12.

17  
18 21 Williams JH, Moser KM. Pneumococcal vaccine and patients with chronic lung  
19  
20 disease. *Ann Intern Med* 1986;104:106-9.

21  
22 22 Lee TA, Weaver FM, Weiss KB. Impact of pneumococcal vaccination on pneumonia  
23  
24 rates in patients with COPD and asthma. *J Gen Intern Med* 2007;22:62-7.

25  
26 23 Alfageme I, Vazquez R, Reyes N, et al. Clinical efficacy of anti-pneumococcal  
27  
28 vaccination in patients with COPD. *Thorax* 2006;61:189-95.

29  
30 24 Cabello H, Torres A, Ceils R, et al. Bacterial colonization of distal airways in healthy  
31  
32 subjects and chronic lung disease: a bronchoscopic study. *Eur Respir J*  
33  
34 1997;10:1137-44.

35  
36 25 Rees PJ. Review: inhaled corticosteroid do not reduce mortality but increase  
37  
38 pneumonia in COPD. *Evid Based Med* 2009;14:9.

39  
40 26 Welte T. Inhaled corticosteroids in COPD and the risk of pneumonia. *Lancet*  
41  
42 2009;374:668-70.

43  
44 27 Almirall J, Bolibar I, Serra-Prat M, et al. New evidence of risk factors for  
45  
46 community-acquired pneumonia: a population-based study. *Eur Respir J*  
47  
48 2008;31:1274-84.

49  
50 28 Lexau CA, Lynfield R, Danila R. Changing epidemiology of invasive pneumococcal  
51  
52 disease among older adults in the era of pediatric pneumococcal conjugate vaccine.  
53  
54  
55  
56  
57  
58  
59  
60

1  
2  
3  
4  
5  
6  
7  
8  
9  
10  
11  
12  
13  
14  
15  
16  
17  
18  
19  
20  
21  
22  
23  
24  
25  
26  
27  
28  
29  
30  
31  
32  
33  
34  
35  
36  
37  
38  
39  
40  
41  
42  
43  
44  
45  
46  
47  
48  
49  
50  
51  
52  
53  
54  
55  
56  
57  
58  
59  
60

*JAMA* 2005;294:2043-51.

29 Smith KJ, Zimmerman RK, Lin CJ, et al. Alternative strategies for adult pneumococcal polysaccharide vaccination: A cost-effectiveness analysis. *Vaccine* 2008;26:1420-31.

30 Musher DM. Pneumococcal vaccine - Direct and indirect (herd) effects. *N Engl J Med* 2006;354:1522-4.

31 Andrews A, Nadjim B, Gant V, et al. Community-acquired pneumonia. *Curr Opin Pulm Med* 2003;9:175-80.

32 Fine MJ, Auble TE, Yealy DM, et al. A prediction rule to identify low-risk patients with community-acquired pneumonia. *N Engl J Med* 1997;336:243-50.

33 Andreo F, Ruiz-Manzano J, Prat C, et al. Utility of pneumococcal urinary antigen detection in diagnosing exacerbations in COPD patients. *Respir Med* 2010;104:397-403.

34 Waterer GW, Jennings G, Wunderink RG. The impact of blood cultures on antibiotic therapy in pneumococcal pneumonia. *Chest* 1999;116:1278-81.



STROBE 2007 (v4) Statement—Checklist of items that should be included in reports of *cohort studies*

| Section/Topic                | Item # | Recommendation                                                                                                                                                                       | Reported on page # |
|------------------------------|--------|--------------------------------------------------------------------------------------------------------------------------------------------------------------------------------------|--------------------|
| Title and abstract           | 1      | (a) Indicate the study's design with a commonly used term in the title or the abstract                                                                                               | 1-4                |
|                              |        | (b) Provide in the abstract an informative and balanced summary of what was done and what was found                                                                                  | 3-5                |
| <b>Introduction</b>          |        |                                                                                                                                                                                      |                    |
| Background/rationale         | 2      | Explain the scientific background and rationale for the investigation being reported                                                                                                 | 5,6                |
| Objectives                   | 3      | State specific objectives, including any prespecified hypotheses                                                                                                                     | 5,6                |
| <b>Methods</b>               |        |                                                                                                                                                                                      |                    |
| Study design                 | 4      | Present key elements of study design early in the paper                                                                                                                              | 6,7                |
| Setting                      | 5      | Describe the setting, locations, and relevant dates, including periods of recruitment, exposure, follow-up, and data collection                                                      | 6-8                |
| Participants                 | 6      | (a) Give the eligibility criteria, and the sources and methods of selection of participants. Describe methods of follow-up                                                           | 6,7                |
|                              |        | (b) For matched studies, give matching criteria and number of exposed and unexposed                                                                                                  | 6,7,18             |
| Variables                    | 7      | Clearly define all outcomes, exposures, predictors, potential confounders, and effect modifiers. Give diagnostic criteria, if applicable                                             | 7,8                |
| Data sources/<br>measurement | 8*     | For each variable of interest, give sources of data and details of methods of assessment (measurement). Describe comparability of assessment methods if there is more than one group | 7-9                |
| Bias                         | 9      | Describe any efforts to address potential sources of bias                                                                                                                            | 7                  |
| Study size                   | 10     | Explain how the study size was arrived at                                                                                                                                            | 6                  |
| Quantitative variables       | 11     | Explain how quantitative variables were handled in the analyses. If applicable, describe which groupings were chosen and why                                                         | 8,9                |
| Statistical methods          | 12     | (a) Describe all statistical methods, including those used to control for confounding                                                                                                | 9,10               |
|                              |        | (b) Describe any methods used to examine subgroups and interactions                                                                                                                  | 9,10               |
|                              |        | (c) Explain how missing data were addressed                                                                                                                                          | NA                 |
|                              |        | (d) If applicable, explain how loss to follow-up was addressed                                                                                                                       | NA                 |
|                              |        | (e) Describe any sensitivity analyses                                                                                                                                                | NA                 |
| <b>Results</b>               |        |                                                                                                                                                                                      |                    |

|                          |     |                                                                                                                                                                                                              |             |
|--------------------------|-----|--------------------------------------------------------------------------------------------------------------------------------------------------------------------------------------------------------------|-------------|
| Participants             | 13* | (a) Report numbers of individuals at each stage of study—eg numbers potentially eligible, examined for eligibility, confirmed eligible, included in the study, completing follow-up, and analysed            | 10,18       |
|                          |     | (b) Give reasons for non-participation at each stage                                                                                                                                                         | NA          |
|                          |     | (c) Consider use of a flow diagram                                                                                                                                                                           | NA          |
| Descriptive data         | 14* | (a) Give characteristics of study participants (eg demographic, clinical, social) and information on exposures and potential confounders                                                                     | 10,18       |
|                          |     | (b) Indicate number of participants with missing data for each variable of interest                                                                                                                          | NA          |
|                          |     | (c) Summarise follow-up time (eg, average and total amount)                                                                                                                                                  | NA          |
| Outcome data             | 15* | Report numbers of outcome events or summary measures over time                                                                                                                                               | 10-12,18-20 |
| Main results             | 16  | (a) Give unadjusted estimates and, if applicable, confounder-adjusted estimates and their precision (eg, 95% confidence interval). Make clear which confounders were adjusted for and why they were included | 10-12,19,20 |
|                          |     | (b) Report category boundaries when continuous variables were categorized                                                                                                                                    | NA          |
|                          |     | (c) If relevant, consider translating estimates of relative risk into absolute risk for a meaningful time period                                                                                             | NA          |
| Other analyses           | 17  | Report other analyses done—eg analyses of subgroups and interactions, and sensitivity analyses                                                                                                               | 11,21       |
| <b>Discussion</b>        |     |                                                                                                                                                                                                              |             |
| Key results              | 18  | Summarise key results with reference to study objectives                                                                                                                                                     | 12,13       |
| <b>Limitations</b>       |     |                                                                                                                                                                                                              |             |
| Interpretation           | 20  | Give a cautious overall interpretation of results considering objectives, limitations, multiplicity of analyses, results from similar studies, and other relevant evidence                                   | 12-17       |
| Generalisability         | 21  | Discuss the generalisability (external validity) of the study results                                                                                                                                        | 13-14       |
| <b>Other information</b> |     |                                                                                                                                                                                                              |             |
| Funding                  | 22  | Give the source of funding and the role of the funders for the present study and, if applicable, for the original study on which the present article is based                                                | 22          |

\*Give information separately for cases and controls in case-control studies and, if applicable, for exposed and unexposed groups in cohort and cross-sectional studies.

**Note:** An Explanation and Elaboration article discusses each checklist item and gives methodological background and published examples of transparent reporting. The STROBE checklist is best used in conjunction with this article (freely available on the Web sites of PLoS Medicine at <http://www.plosmedicine.org/>, Annals of Internal Medicine at <http://www.annals.org/>, and Epidemiology at <http://www.epidem.com/>). Information on the STROBE Initiative is available at [www.strobe-statement.org](http://www.strobe-statement.org).

Figure 1

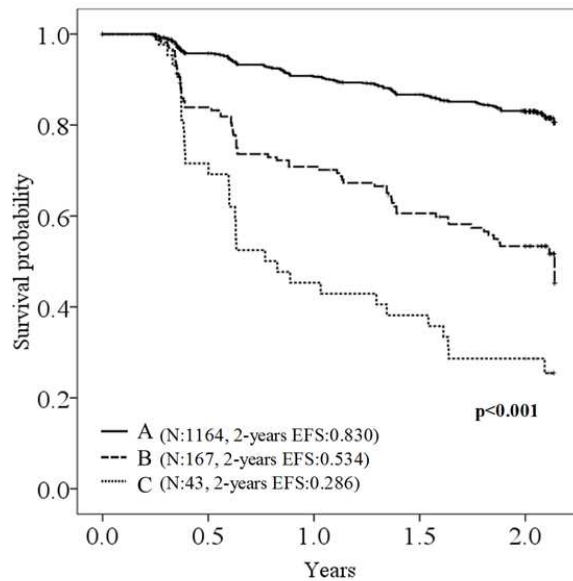

\*EFS: event free survival, event: pulmonary infection

Kaplan-Meier curves showing the proportion of patients free of the first episode of pulmonary infection during the observation period  
Frequency of pulmonary infection during the pre-vaccine period: zero episodes, A; one episode, B; more than 1 episode, C

254x190mm (96 x 96 DPI)

1  
2  
3  
4  
5  
6  
7  
8  
9  
10  
11  
12  
13  
14  
15  
16  
17  
18  
19  
20  
21  
22  
23  
24  
25  
26  
27  
28  
29  
30  
31  
32  
33  
34  
35  
36  
37  
38  
39  
40  
41  
42  
43  
44  
45  
46  
47  
48  
49  
50  
51  
52  
53  
54  
55  
56  
57  
58  
59  
60

Figure 2

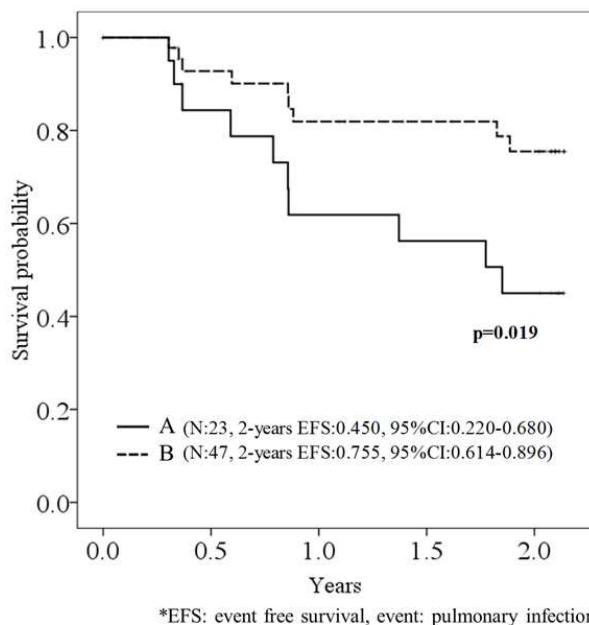

Kaplan-Meier curves showing the proportion of patients free of the first episode of pulmonary infection during the observation period  
 Patients with chronic respiratory failure who had 0 episodes of pulmonary infection during the pre-vaccine period: unvaccinated, A; vaccinated, B

254x190mm (96 x 96 DPI)

only

Figure A

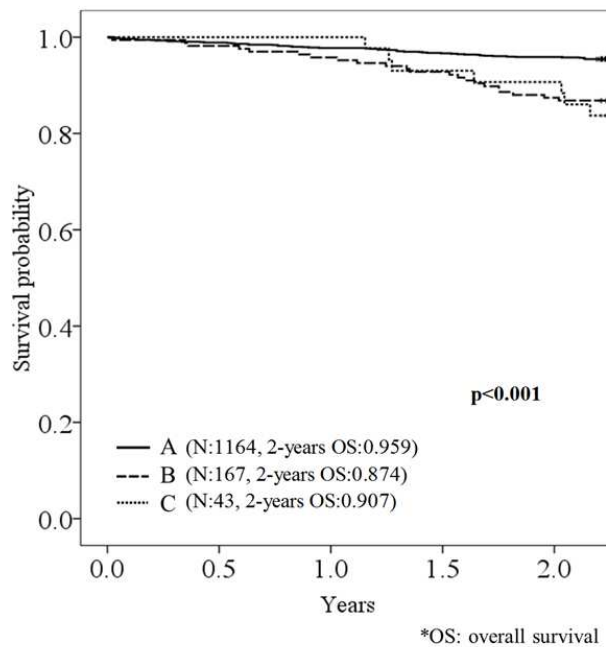

Kaplan-Meier curves showing the proportion of patients free of death during the observation period  
Frequency of pulmonary infection during the pre-vaccine period: 0 episodes, A; one episode, B;  
more than one episode, C

254x190mm (96 x 96 DPI)

1  
2  
3  
4  
5  
6  
7  
8  
9  
10  
11  
12  
13  
14  
15  
16  
17  
18  
19  
20  
21  
22  
23  
24  
25  
26  
27  
28  
29  
30  
31  
32  
33  
34  
35  
36  
37  
38  
39  
40  
41  
42  
43  
44  
45  
46  
47  
48  
49  
50  
51  
52  
53  
54  
55  
56  
57  
58  
59  
60

Figure B

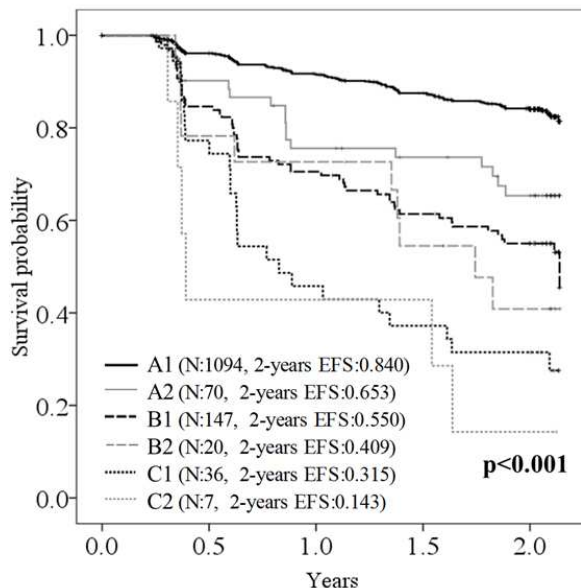

\*EFS: event-free survival, event: pulmonary infection

Kaplan-Meier curves showing the proportion of patients free of the first episode of pulmonary infection during the observation period  
 Zero episodes of pulmonary infection during the pre-vaccine period: without chronic respiratory failure, A1; with chronic respiratory failure, A2  
 One episode of pulmonary infection during the pre-vaccine period: without chronic respiratory failure, B1; with chronic respiratory failure, B2  
 More than 1 episode of pulmonary infection during the pre-vaccine period without chronic respiratory failure, C1; with chronic respiratory failure, C2

254x190mm (96 x 96 DPI)

only

Figure C

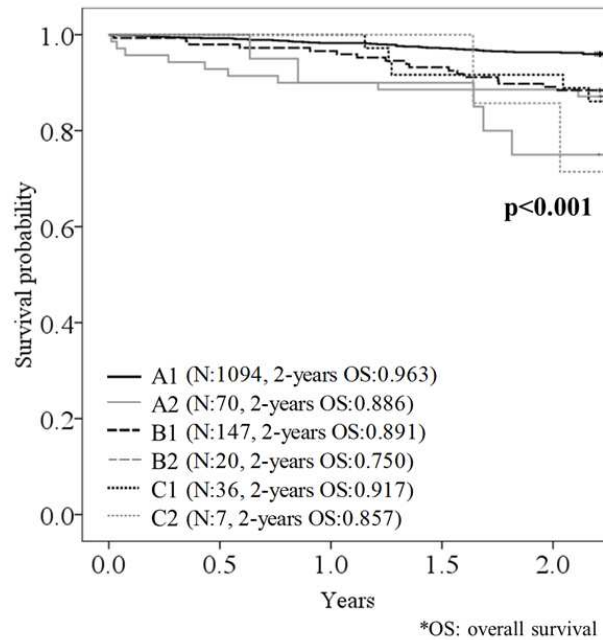

Kaplan-Meier curves showing the proportion of patients free of death during the observation period

Zero episodes of pulmonary infection during the pre-vaccine period: without chronic respiratory failure, A1; with chronic respiratory failure, A2

One episode of pulmonary infection during the pre-vaccine period: without chronic respiratory failure, B1; with chronic respiratory failure, B2

More than 1 episode of pulmonary infection during the pre-vaccine period: without chronic respiratory failure, C1; with chronic respiratory failure, C2

254x190mm (96 x 96 DPI)

Figure D

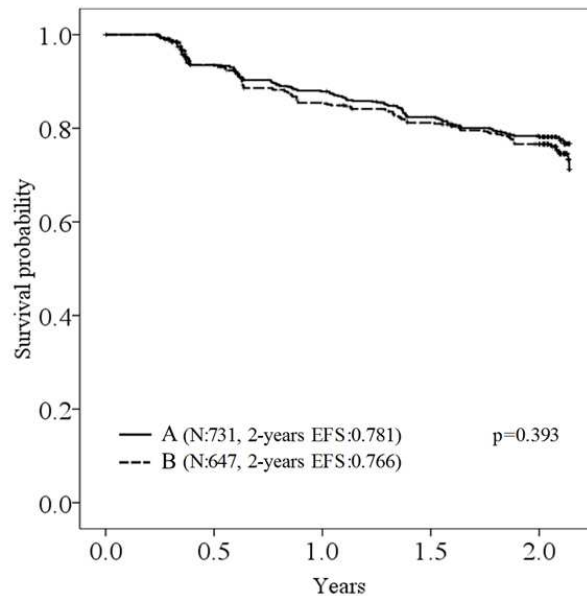

\*EFS: event-free survival, event: pulmonary infection

Kaplan-Meier curves showing the proportion of patients free of the first episode of pulmonary infection during the observation period

All the participants: unvaccinated, A; vaccinated, B

254x190mm (96 x 96 DPI)



1  
2  
3  
4  
5  
6  
7  
8  
9  
10  
11  
12  
13  
14  
15  
16  
17  
18  
19  
20  
21  
22  
23  
24  
25  
26  
27  
28  
29  
30  
31  
32  
33  
34  
35  
36  
37  
38  
39  
40  
41  
42  
43  
44  
45  
46  
47  
48  
49  
50  
51  
52  
53  
54  
55  
56  
57  
58  
59  
60

Figure E

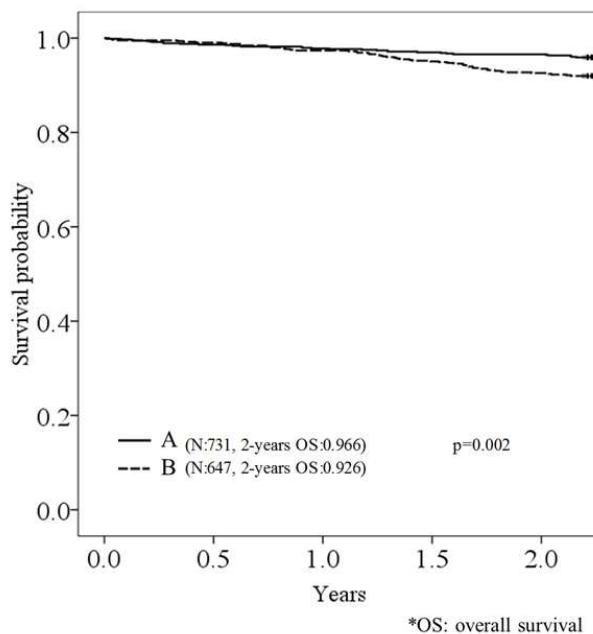

Kaplan-Meier curves showing the proportion of patients free of death during the observation period  
All the participants: unvaccinated, A; vaccinated, B

254x190mm (96 x 96 DPI)

Peer Review Only

1  
2  
3  
4  
5  
6  
7  
8  
9  
10  
11  
12  
13  
14  
15  
16  
17  
18  
19  
20  
21  
22  
23  
24  
25  
26  
27  
28  
29  
30  
31  
32  
33  
34  
35  
36  
37  
38  
39  
40  
41  
42  
43  
44  
45  
46  
47  
48  
49  
50  
51  
52  
53  
54  
55  
56  
57  
58  
59  
60

Figure F

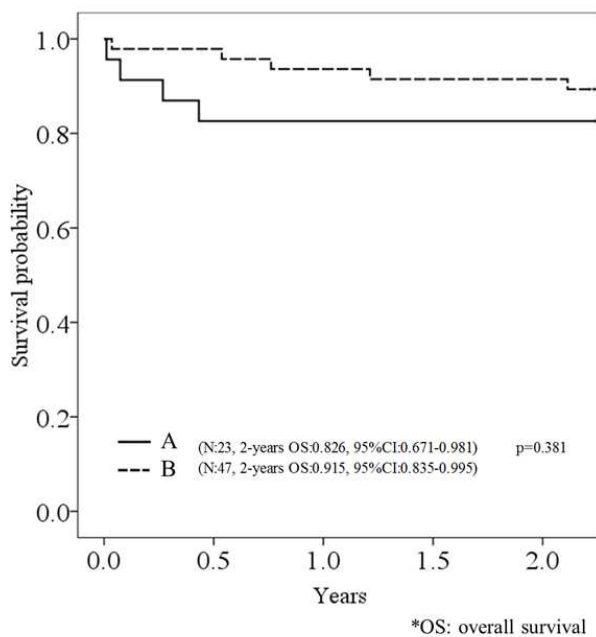

Kaplan-Meier curves showing the proportion of patients free of death during the observation period  
 Patients with chronic respiratory failure who had 0 episodes of pulmonary infection during the pre-  
 vaccine period: unvaccinated, A; vaccinated, B

254x190mm (96 x 96 DPI)

Peer Review Only

Figure G

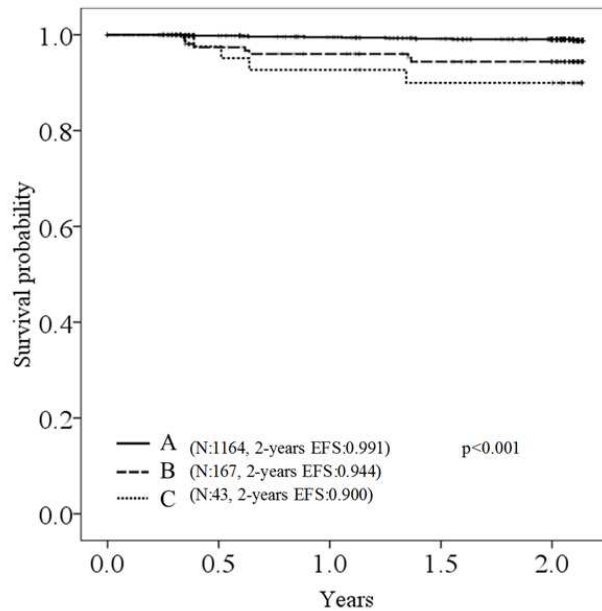

\*EFS: event-free survival, event: pneumococcal pneumonia

Kaplan-Meier curves showing the proportion of patients free of pneumococcal pulmonary infection during the observation period

Frequency of pulmonary infection during the pre-vaccine period: zero episodes, A; one episode, B; more than 1 episode, C

254x190mm (96 x 96 DPI)

1  
2  
3  
4  
5  
6  
7  
8  
9  
10  
11  
12  
13  
14  
15  
16  
17  
18  
19  
20  
21  
22  
23  
24  
25  
26  
27  
28  
29  
30  
31  
32  
33  
34  
35  
36  
37  
38  
39  
40  
41  
42  
43  
44  
45  
46  
47  
48  
49  
50  
51  
52  
53  
54  
55  
56  
57  
58  
59  
60

Figure H

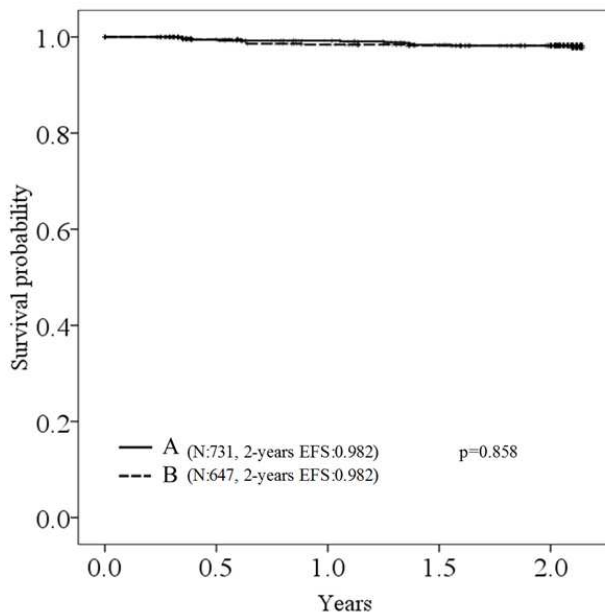

\*EFS: event-free survival, event: pneumococcal pneumonia

Kaplan-Meier curves showing the proportion of patients free of pneumococcal pulmonary infection during the observation period

All the participants: unvaccinated, A; vaccinated, B

254x190mm (96 x 96 DPI)

For peer review only

Table A: The effects of pulmonary infection during the pre-vaccine period and chronic respiratory failure on death of any cause-free survival after PPV23 vaccination

| Frequency of pulmonary infection during the pre-vaccine period | Chronic respiratory failure | N    | event* | Death of any cause-free survival at the end of the study* | 95%CI         | P value† |
|----------------------------------------------------------------|-----------------------------|------|--------|-----------------------------------------------------------|---------------|----------|
| 0                                                              | (-)                         | 1094 | 46     | 0.956                                                     | 0.951 – 0.975 | 0.001    |
| 0                                                              | (+)                         | 70   | 9      | 0.886                                                     | 0.793 – 0.949 |          |
| 1                                                              | (-)                         | 147  | 17     | 0.891                                                     | 0.833 – 0.935 | 0.096    |
| 1                                                              | (+)                         | 20   | 5      | 0.750                                                     | 0.560 – 0.940 |          |
| >1                                                             | (-)                         | 36   | 6      | 0.917                                                     | 0.787 – 0.991 | 0.346    |
| >1                                                             | (+)                         | 7    | 2      | 0.857                                                     | 0.379 – 1.049 |          |

\*Event represented the number of patient death during the observation period.

†Data was analyzed using the log-rank test.

Table B: The cause of death (total 85) among all the participants during the observation period

|                                       | Vaccinated<br>(54) | Unvaccinated<br>(31) |
|---------------------------------------|--------------------|----------------------|
| Pulmonary infection<br>(pneumococcal) | 11<br>(5)          | 8<br>(2)             |
| Chronic respiratory<br>failure        | 13                 | 6                    |
| Chronic heart failure                 | 5                  | 2                    |
| Cardiovascular disease                | 1                  | 0                    |
| Lung cancer                           | 12                 | 9                    |
| Cerebrovascular<br>disease            | 5                  | 0                    |
| Liver cirrhosis                       | 0                  | 1                    |
| Unknown                               | 7                  | 5                    |

Table C: The underlying pulmonary conditions of patients who were diagnosed with pneumococcal pulmonary infection during the observation period

| <b>Pulmonary infection during the pre-vaccine period</b> | <b>Chronic respiratory failure</b> | <b>N (total = 22)*</b> |
|----------------------------------------------------------|------------------------------------|------------------------|
| 0                                                        | -                                  | 10                     |
|                                                          | +                                  | 0                      |
| 1                                                        | -                                  | 6                      |
|                                                          | +                                  | 2                      |
| >1                                                       | -                                  | 3                      |
|                                                          | +                                  | 1                      |

\*Data represents the number of patient in each group.



**Heterogeneity of the efficacy of the 23-valent pneumococcal polysaccharide vaccine caused by various underlying conditions of chronic pulmonary disease in elderly patients: Prospective cohort study**

|                               |                                                                                                                                                                                                                                                                            |
|-------------------------------|----------------------------------------------------------------------------------------------------------------------------------------------------------------------------------------------------------------------------------------------------------------------------|
| Journal:                      | <i>BMJ Open</i>                                                                                                                                                                                                                                                            |
| Manuscript ID:                | bmjopen-2011-000105.R3                                                                                                                                                                                                                                                     |
| Article Type:                 | Research                                                                                                                                                                                                                                                                   |
| Date Submitted by the Author: | 05-May-2011                                                                                                                                                                                                                                                                |
| Complete List of Authors:     | Inoue, Satoshi; Yokohama City University, Department of Epidemiology and Public Health<br>Watanuki, Yuji<br>Kaneko, Tetsuji<br>Sato, Takashi<br>Miyazawa, Naoki<br>Kaneko, Takeshi<br>Ishigatsubo, Yoshiaki<br>Morita, Satoshi<br>Natsumeda, Yutaka<br>Mizushima, Shunsaku |
| <b>Subject Heading</b>:       | Infectious diseases                                                                                                                                                                                                                                                        |
| Keywords:                     | Infection control < INFECTIOUS DISEASES, Respiratory infections < THORACIC MEDICINE, Adult thoracic medicine < THORACIC MEDICINE                                                                                                                                           |
|                               |                                                                                                                                                                                                                                                                            |

SCHOLARONE™  
Manuscripts



1  
2  
3  
4 **Heterogeneity of the efficacy of the 23-valent pneumococcal polysaccharide vaccine**  
5 **caused by various underlying conditions of chronic pulmonary disease in elderly**  
6 **patients: Prospective cohort study**  
7  
8  
9

10 Satoshi Inoue,<sup>1,5</sup> Yuji Watanuki,<sup>2</sup> Tetsuji Kaneko,<sup>3</sup> Takashi Sato,<sup>2</sup> Naoki Miyazawa,<sup>2</sup>  
11 Takeshi Kaneko,<sup>4</sup> Yoshiaki Ishigatsubo,<sup>2</sup> Satoshi Morita,<sup>3</sup> Yutaka Natsumeda,<sup>5</sup> Shunsaku  
12 Mizushima,<sup>1</sup>  
13  
14  
15

16  
17  
18 <sup>1</sup>Department of Epidemiology and Public Health, Yokohama City University Graduate  
19 School of Medicine, 3-9 Fukuura, Kanazawa-ku Yokohama 236-0004 Japan  
20  
21

22 <sup>2</sup>Department of Internal Medicine and Clinical Immunology, Yokohama City University  
23 Graduate School of Medicine, Yokohama, Japan  
24  
25

26 <sup>3</sup>Department of Biostatistics and Epidemiology, Yokohama City University Graduate  
27 School of Medicine, Yokohama, Japan  
28  
29

30 <sup>4</sup>Department of Pulmonary Medicine, Yokohama City University Graduate School of  
31 Medicine, Yokohama, Japan  
32  
33

34 <sup>5</sup>Department of Clinical Research, Yokohama City University Graduate School of  
35 Medicine, Yokohama, Japan  
36  
37  
38  
39

40 Corresponding author:

41  
42 Satoshi Inoue, MD, PhD

43  
44 Tel: 81-45-787-2610

45  
46 Fax: 81-45-787-2609

47  
48 E-mail: [ino999@yokohama-cu.ac.jp](mailto:ino999@yokohama-cu.ac.jp)  
49  
50  
51  
52  
53  
54  
55  
56  
57  
58  
59  
60

Key word: PPV23, chronic pulmonary disease, elderly patient, respiratory infection

Word count: 3262

For peer review only

1  
2  
3  
4  
5  
6  
7  
8  
9  
10  
11  
12  
13  
14  
15  
16  
17  
18  
19  
20  
21  
22  
23  
24  
25  
26  
27  
28  
29  
30  
31  
32  
33  
34  
35  
36  
37  
38  
39  
40  
41  
42  
43  
44  
45  
46  
47  
48  
49  
50  
51  
52  
53  
54  
55  
56  
57  
58  
59  
60

**ABSTRACT****Objective**

To determine the ideal conditions for use of the 23-valent pneumococcal polysaccharide vaccine (PPV23) in elderly outpatients with chronic pulmonary diseases.

**Design**

Prospective cohort study

**Participants**

A total of 1,378 outpatients with chronic pulmonary diseases  $\geq 60$  years of age

**Intervention**

Participants were educated about PPV23, and those who responded affirmatively were vaccinated between August and November 2002. The participants who chose no intervention served as controls. The pre-vaccine period was defined as August 2001 to August 2002. Participants were followed for 2 years from December 2002 or until death.

**Main outcome measures**

Events of interest included the first episode of bacterial (including pneumococcal) pulmonary infection (primary endpoint) and death of any cause (secondary endpoint).

**Results**

Frequent episodes of pulmonary infection during the pre-vaccine period significantly decreased event-free survival during the 2-year observation period ( $p < 0.001$ ). Chronic respiratory failure was associated with a decreased event-free survival only when the pulmonary infection episode did not occur in the pre-vaccine period ( $p < 0.001$ ). No significant differences in event-free survival were observed between the vaccinated and unvaccinated group during analysis of the entire cohort. In the Cox proportional hazards

1  
2  
3  
4 regression model, event-free survival decreased significantly when pulmonary infection  
5  
6 occurred in the pre-vaccine period. In the subgroup analysis, the first episode of  
7  
8 bacterial pulmonary infection (but not death of any cause) was reduced significantly by  
9  
10 PPV23 only in patients with chronic respiratory failure who had no episodes of  
11  
12 pulmonary infection during the pre-vaccine period ( $p = 0.019$ ).

### 14 **Conclusion**

15  
16 The efficacy of PPV23 against pulmonary infection and death of any cause might be  
17  
18 unachievable if pulmonary infection occurs during the pre-vaccine period. PPV23 needs  
19  
20 to be given to elderly patients with chronic pulmonary disease at an earlier time in  
21  
22 which infectious complications in the lung have not yet occurred.  
23  
24

### 26 **Summary**

- 27  
28  
29 • Article focus (hypothesis):

30  
31 The efficacy of PPV23 might be compromised by an episode of pulmonary infection in  
32  
33 the pre-vaccine period or chronic respiratory failure in elderly patients with chronic  
34  
35 pulmonary disease.  
36

- 37  
38 • Key messages:

- 39  
40 1. The PPV23 efficacy might be unachievable if pulmonary infection occurs during the  
41  
42 pre-vaccine period.  
43  
44 2. The episode of pulmonary infection could be prevented by PPV23 in elderly patients  
45  
46 with noninfectious complications such as chronic respiratory failure.  
47  
48 3. Elderly patients with chronic pulmonary disease need to receive the PPV23  
49  
50 vaccination at an earlier time in which infectious complications in the lung have not yet  
51  
52  
53  
54  
55  
56  
57  
58  
59  
60

1  
2  
3  
4 occurred.

5  
6 • Strengths and limitations of this study:

7  
8  
9 1. Only participants who responded affirmatively received PPV23. They were not  
10 assigned randomly to a group.

11  
12 2. The diagnosis of pneumococcal pulmonary disease was not made in the majority of  
13 patients who had pulmonary infection during the study period. The microbiological  
14 diagnosis in the lower respiratory tract, which is not normally sterile, is ambiguous.  
15  
16  
17  
18  
19

20  
21 **INTRODUCTION**

22  
23 *Streptococcus pneumoniae* continues to be one of the main causative pathogens in  
24 community-acquired pneumonia and meningitis.[1-2] Due to the high mortality rate of *S.*  
25 *pneumoniae* infections, especially in elderly and very young patients, prophylactic use  
26 of 23-valent pneumococcal polysaccharide vaccine (PPV23) is recommended for people  
27 at an increased risk of pneumococcal disease in developed countries.[3-7] The efficacy  
28 of PPV23, however, remains controversial. Despite the fact that the results of pre- and  
29 post-licensed trials in immunocompetent people were supportive of regulatory approval  
30 of vaccine use, clinical studies in elderly or young adults with comorbidities in  
31 developed countries produced little convincing evidence of effectiveness against a  
32 common manifestation of pneumococcal infections such as pneumonia.[8-12] A  
33 retrospective study conducted in 1999 suggested that PPV23 was associated with  
34 significant reductions in hospitalisation and mortality rates of elderly patients with  
35 chronic lung disease and contributed to medical care cost savings, although  
36 meta-analytical reviews published thereafter failed to show statistically significant  
37  
38  
39  
40  
41  
42  
43  
44  
45  
46  
47  
48  
49  
50  
51  
52  
53  
54  
55  
56  
57  
58  
59  
60

1  
2  
3  
4 evidence of the protective effects of PPV23 against the development of pneumonia in  
5 elderly patients with chronic illnesses.[13-15]  
6  
7

8 We previously reported a 2-year cohort clinical study of elderly outpatients with  
9 chronic pulmonary disease to investigate the prophylactic effects of PPV23 on bacterial  
10 and pneumococcal pulmonary infection onset and outcome.[16] Analysis of the  
11 comparison between the vaccinated and unvaccinated group showed a decline in the  
12 incidence of bacterial pulmonary infection only in the vaccinated group. This result  
13 might be associated with PPV23 effectiveness, although detailed background  
14 information regarding underlying pulmonary conditions was not provided. Subgroup  
15 analysis needs to be carried out since chronic pulmonary disease includes various  
16 clinical and pathophysiological pictures. Underlying pulmonary diseases could cause  
17 chronic respiratory failure if repeatedly complicated by lung infections, and such  
18 heterogeneity may generate different outcomes after vaccination.[17] We decided to  
19 reanalyse the data to study the influence of clinical background during the pre-vaccine  
20 period on PPV23 efficacy in elderly patients with chronic pulmonary disease.  
21  
22  
23  
24  
25  
26  
27  
28  
29  
30  
31  
32  
33  
34  
35

## 36 **METHODS**

### 37 **Study population**

38 All the outpatients  $\geq 60$  years of age (a total of 1,378 participants at the start of the  
39 study) with chronic pulmonary disease in the Kanagawa Cardiovascular and Respiratory  
40 Diseases Centre were included in this study. These patients were informed of the  
41 prophylactic effects of PPV23 on infectious pulmonary exacerbations. Chronic  
42 pulmonary diseases in this study included bronchial asthma, chronic pulmonary  
43 emphysema, old tuberculosis, chronic bronchitis, bronchiectasis, nontuberculous  
44  
45  
46  
47  
48  
49  
50  
51  
52  
53  
54  
55  
56  
57  
58  
59  
60

1  
2  
3  
4 mycobacteria, and others (Table 1). Patients who presented with a fever ( $\geq 37.5$  °C) were  
5  
6 excluded from the study according to the Preventive Vaccination Law issued by the  
7  
8 Japanese Ministry of Health, Labour and Welfare. Once the clinical status of these  
9  
10 patients became stable, they were invited to participate in the study. Home oxygen  
11  
12 therapy (HOT) had been prescribed according to the Japanese Respiratory Society (JRS)  
13  
14 Guidelines for 97 participants with chronic respiratory failure upon study initiation  
15  
16 (Table 1), but no patients were newly prescribed HOT during the observation period.  
17  
18  
19

### 20 **Study design**

21  
22 We did not adopt a randomised controlled study design since the PPV23 vaccination is  
23  
24 considered a part of standard care in many developed countries. Additionally, some  
25  
26 elderly participants with chronic pulmonary disease were in an immunocompromised  
27  
28 status; therefore, a randomised controlled study of vaccine effectiveness may violate  
29  
30 ethical principles and human rights. Written informed consent forms were obtained from  
31  
32 all participants. To avoid selection bias, doctors and other medical staffs were not  
33  
34 allowed to assign patients to the vaccine or non-vaccine group; instead, individual  
35  
36 patients decided whether or not to be vaccinated. The same form, which included an  
37  
38 explanation of the study, was provided to all the participants. A total of 647 patients  
39  
40 were injected with PPV23 (Pneumovax, Merck, NJ, USA) intramuscularly into their  
41  
42 non-dominant upper arm with between August and November 2002. The pre-vaccine  
43  
44 period was defined as 1 year prior to PPV23 vaccination (August 2001 to July 2002).  
45  
46  
47  
48

### 49 **Data collection**

50 Participants were followed from December 2002 to the end of the study in November  
51  
52  
53  
54  
55  
56  
57  
58  
59  
60

1  
2  
3  
4 2004 (for 2 years) or until death in the clinic approximately every 2 months as long as  
5  
6 clinical status remained stable. A diagnosis of pulmonary infection was made by  
7  
8 respiratory physicians according to the Japanese Respiratory Society Guidelines for the  
9  
10 Management of Community-Acquired Pneumonia in Adults. In brief, pulmonary  
11  
12 infection was suspected if more than 2 of the following criteria were present:  
13  
14 temperature  $\geq 37.0$  °C, white blood cell count  $> 8,000/\text{mm}^3$ , and C-reactive protein  $>$   
15  
16 0.7 mg/dl. A diagnosis of pneumonia was made when chest radiographs revealed  
17  
18 alveolar opacities. If a cough with yellow sputum production was observed in the  
19  
20 absence of the alveolar opacities on the chest radiograph, the patients were diagnosed  
21  
22 with acute bronchitis or exacerbation of chronic bronchitis. It was very difficult to  
23  
24 clearly distinguish pneumonia from acute bronchitis or an acute exacerbation of chronic  
25  
26 bronchitis in some patients since there were considerable clinical overlaps between  
27  
28 these illnesses including the symptoms, blood test results, causative pathogens, and  
29  
30 antibiotic treatment. Hence, pulmonary infection was expressed as a dichotomous  
31  
32 variable.

33  
34 A diagnosis of pneumococcal pulmonary infection was made if *Streptococcus*  
35  
36 *pneumoniae* was the dominant organism stained with Gram stain in the sputum smear or  
37  
38 if the sputum culture was positive ( $> 10^7$  colony forming units/ml). When *S.*  
39  
40 *pneumoniae* was not identified, patients were diagnosed with a pulmonary infection  
41  
42 caused by an identified pathogen or with a bacterial pulmonary infection if no possible  
43  
44 causative pathogen was detected but if the clinical data were highly suggestive of  
45  
46 bacterial infection in the lung. Empirical antibiotic therapy was started in all the patients  
47  
48 promptly once clinical data sufficient to satisfy the definition of pulmonary infection  
49  
50 were obtained. The initial treatment was replaced by second-line therapy of antibiotics  
51  
52



1  
2  
3  
4 chosen according to the sensitivity results.  
5  
6  
7

### 8 **Event of interest**

9  
10 We hypothesised that repeated pulmonary infection and concomitant gradual loss of  
11 lung function might be related to a reduced PPV23 efficacy. Participants were grouped  
12 based on these factors: frequency of infectious (including pneumococcal) pulmonary  
13 infection episode within 1 year prior to the PPV23 vaccination (0 episodes, 1 episode,  
14 and >1 episode), and chronic respiratory failure represented by HOT usage. Events of  
15 interest included the first episode of bacterial or pneumococcal pulmonary infection  
16 (pneumonia, acute bronchitis, or exacerbation of chronic bronchitis) where antibiotic  
17 treatment was required (primary endpoint), and death of any cause (secondary endpoint).  
18 The case of death with missing values was not counted as an event of interest but was  
19 included in the mortality rate.  
20  
21  
22  
23  
24  
25  
26  
27  
28  
29  
30  
31  
32

### 33 **Statistical analysis**

34 Differences in event-free survival were depicted with Kaplan-Meier curves, and the  
35 log-rank test was applied for analysis. The primary and secondary endpoints (the first  
36 episode of pulmonary infection and death of any cause, respectively) were analysed  
37 separately. Cross-tabulated data were compared by the Wilcoxon test or the Pearson's  
38 chi-square test. Relative risks for the events were estimated using the Cox proportional  
39 hazards regression model. The covariates used in the analysis were: (1) pulmonary  
40 infection during the pre-vaccine period, (2) chronic respiratory failure, and (3) PPV23  
41 vaccination. For further analysis, gender and age were added as covariates and the data  
42 were analyzed. No any other variables were regarded as covariates in relation to  
43  
44  
45  
46  
47  
48  
49  
50  
51  
52  
53  
54  
55  
56  
57  
58  
59  
60

1  
2  
3  
4 event-free survival. The PASW statistics 18 (SPSS Inc. IL, USA) and SAS software  
5  
6 (SAS Institute Inc. NC, USA) were used for the statistical analysis.  
7  
8  
9

## 10 RESULTS

11 Participant characteristics are shown in Table 1. Significant reductions in vaccination  
12 rate, age, and frequency of chronic respiratory failure were observed in the group  
13 without pulmonary infection during the pre-vaccine period compared with the other 2  
14 groups with at least 1 episode of infectious lung complications. No significant gender  
15 difference was seen among groups.  
16  
17  
18  
19  
20  
21

22 The effects of underlying pulmonary conditions on event occurrences were analysed  
23 before PPV23 effectiveness were evaluated. Event-free survival in the Kaplan-Meier  
24 method dropped significantly as the frequency of pulmonary infection in the  
25 pre-vaccine period increased: the first episode of pulmonary infection, Figure 1; death  
26 of any cause, Supplemental Figure A. Chronic respiratory failure was associated with a  
27 significant decrease in event-free survival only in the absence of pulmonary infection in  
28 the pre-vaccine period: the first episode of pulmonary infection, Supplemental Figure B,  
29 Table 2; death of any cause, Supplemental Figure C, Supplemental Table A.  
30  
31  
32  
33  
34  
35  
36  
37

38 Participants were not randomly assigned to groups; vaccination was chosen or  
39 declined by each individual. As a result, the number of vaccinated patients was  
40 significantly higher than the number of unvaccinated patients when pulmonary infection  
41 occurred during the pre-vaccine period (Table 1). No significant PPV23 effectiveness  
42 against the development of first episode of pulmonary infection during the observation  
43 period was seen between the vaccinated and unvaccinated group in the Kaplan-Meier  
44 method (Supplemental Figure D). The mortality rate was, however, significantly high in  
45  
46  
47  
48  
49  
50  
51  
52  
53  
54  
55  
56  
57  
58  
59  
60

1  
2  
3  
4 the vaccinated group (Supplemental Figure E). This result may be misleading due to the  
5 vaccination imbalance among groups. In the Cox proportional hazards regression model  
6 applied for covariate adjustment, no hazardous effects of PPV23 on the incidence or  
7 timing of the first episode of pulmonary infection or death of any cause were observed.  
8  
9 The hazard ratio for the first episode of pulmonary infection or death of any cause  
10 increased significantly due to some covariates such as pulmonary infection during the  
11 pre-vaccine period and chronic respiratory failure. Other covariates including gender,  
12 and age were not associated with the first episode of pulmonary infection but were  
13 associated with death of any cause (Table 3). The cause of death (n = 85) among all the  
14 participants during the observation period was shown in Supplemental Table B.  
15  
16  
17  
18  
19  
20  
21  
22  
23

24 A subgroup analysis was performed to find the ideal condition for PPV23 use in  
25 elderly patients with chronic pulmonary disease. There are no significant differences in  
26 pulmonary infection-free survival between vaccinated and unvaccinated patients when  
27 grouped only by frequency of pulmonary infection in the pre-vaccine period (not  
28 shown). Pulmonary infection-free survival was somewhat improved when patients with  
29 chronic respiratory failure were vaccinated (p = 0.078). This effectiveness became  
30 significant when patients who had at least 1 episode of pulmonary infection in the  
31 pre-vaccine period were excluded (Figure 2) (Table 4). The mortality was not reduced  
32 by PPV23 in patients with chronic respiratory failure who had no episodes of  
33 pulmonary infection during the pre-vaccine period (Supplemental Figure F). The cause  
34 of death (n = 9) among patients with chronic respiratory failure who had no episodes of  
35 pulmonary infection during the pre-vaccine period was as follows: chronic respiratory  
36 failure, 2; cerebrovascular disease, 2; and unknown, 1 in vaccinated patients and chronic  
37 respiratory failure, 2; lung cancer, 1; and unknown, 1 in unvaccinated patients. In this  
38  
39  
40  
41  
42  
43  
44  
45  
46  
47  
48  
49  
50  
51  
52  
53  
54  
55  
56  
57  
58  
59  
60

1  
2  
3  
4 group, PPV23 was shown to have an effect on the first episode of pulmonary infection  
5  
6 but it did not reduce the number of deaths due to any cause.  
7

8  
9 There were only 29 pneumococcal pulmonary infection during the observation  
10 period (pneumococcal pulmonary infection, 22; death, 7; Supplemental Table C). The  
11 pneumococcal pneumonia-free survival decreased significantly in the presence of  
12 pulmonary infection during the pre-vaccine period ( $p < 0.001$ ; Supplemental Figure G).  
13  
14 No effects of chronic respiratory failure on pneumococcal pneumonia-free survival were  
15 observed ( $p = 0.196$ ). PPV23 vaccination did not show significant protective effects  
16 against the development of pneumococcal pneumonia (Supplemental Figure H).  
17  
18  
19  
20  
21  
22  
23

## 24 **DISCUSSION**

25  
26 The effects of the PPV23 vaccination on elderly patients with chronic pulmonary  
27 disease varied in accordance with the frequency of lung infection episodes and the  
28 presence of chronic respiratory failure during the pre-vaccine period. Our findings  
29 suggest the following: PPV23 vaccination might work effectively unless previous lung  
30 infection episodes had occurred; and subgroup analysis of the underlying disease  
31 associated with pneumococcal complications might be useful for finding the possible  
32 ideal conditions for PPV23 use. To our knowledge, this is the first report to characterise  
33 PPV23 effectiveness due to the heterogeneity of underlying lung conditions such as the  
34 presence of pulmonary infection episodes prior to vaccination or chronic pulmonary  
35 failure in elderly patients with chronic pulmonary disease.  
36  
37  
38  
39  
40  
41  
42  
43  
44  
45  
46  
47

### 48 **Comparison with other studies**

49  
50 Previous pulmonary infection was highly associated with poor clinical prognosis. This  
51  
52  
53  
54  
55  
56  
57  
58  
59  
60

1  
2  
3  
4 finding suggests that beneficial PPV23 effectiveness might be unachievable for elderly  
5 people with chronic pulmonary disease in the presence of infectious complications  
6 during the pre-vaccine period. In a multicentre double-blind controlled study conducted  
7  
8 in Sweden, PPV23 was not efficacious against overall pneumonia in middle or elderly  
9  
10 non-immunocompromised individuals who had been treated for community-acquired  
11  
12 pneumonia.[18] In that study, the survival rate calculated by the Kaplan-Meier method  
13  
14 was still >80% in both vaccinated and unvaccinated populations after 2-year  
15  
16 observation, while our results showed that the survival rate was <60% if episodes of  
17  
18 pulmonary infection had occurred within 1 year prior to vaccination. These results are  
19  
20 consistent with previous suggestions that chronic pulmonary disease such as chronic  
21  
22 obstructive pulmonary disease (COPD) is a risk factor for repeated pneumonia and that  
23  
24 protective effects of PPV23 could not be obtained.[19-21] Conflicting results were  
25  
26 shown in some other reports in which the beneficial effects of PPV23 in patients with  
27  
28 COPD were indicated, although previous episodes of pneumonia prior to vaccination  
29  
30 were not considered and participants were not limited to the elderly.[13, 22] Alfageme  
31  
32 et al showed PPV23 effectiveness in patients <65 years of age with COPD in a  
33  
34 randomised controlled study in 596 patients.[23] These results and our data indicate that  
35  
36 PPV23 might be inefficacious on the elderly population with chronic pulmonary disease  
37  
38 especially when complicated by lung infection prior to the vaccination. Despite the  
39  
40 strong evidence of PPV23 efficacy against invasive pneumococcal disease (IPD),  
41  
42 altered immune response, disruption of a physical barrier in the airways due to  
43  
44 progressive chronic pulmonary disease, and repeated pulmonary infection could  
45  
46 compromise the benefits.[1, 24] PPV23 vaccination should be given to patients with  
47  
48 chronic pulmonary disease at an earlier stage in which infectious complications have not  
49  
50  
51  
52  
53  
54  
55  
56  
57  
58  
59  
60

1  
2  
3  
4 yet occurred.  
5

6 The probability of survival was significantly increased by PPV23 in the presence of  
7 chronic respiratory failure in patients without episodes of pulmonary infection during  
8 the pre-vaccine period. The pulmonary infection-free survival rate was 75.5% at the end  
9 of the observation period when PPV23 was given. Without PPV23, survival was  
10 reduced to 45.0%, almost the same level as that in the case where infectious lung  
11 complications had occurred during the pre-vaccine period. This result indicates that  
12 pulmonary infection due to chronic respiratory failure could be prevented by the PPV23  
13 vaccination. Oxygen therapy and inhalation therapy containing corticosteroids may be  
14 administered in COPD patients when airflow is severe and chronic respiratory failure is  
15 present, but these treatments were suggested to be risk factors for community-acquired  
16 pneumonia.[25-27] Additionally, bacterial colonisation of the distal airway may occur  
17 due to the altered pulmonary defense.[24] We suggest that patients receive the PPV23  
18 vaccination soon after the diagnosis of chronic respiratory disease such as COPD,  
19 especially when maintenance treatments for impaired lung function are expected to be  
20 risk factors for pneumonia. In this study, the number of participants with chronic  
21 respiratory failure who were free of lung infections during the pre-vaccine period was  
22 only 70. Thus, a large scale study is warranted.  
23  
24  
25  
26  
27  
28  
29  
30  
31  
32  
33  
34  
35  
36  
37  
38  
39  
40  
41

#### 42 **Strengths and limitations of the study**

43  
44 When informed consents were obtained prior to the study initiation, PPV23 vaccine  
45 recommendations were made and only participants who responded affirmatively  
46 received the vaccination. This method may be associated with these results: the  
47 vaccination rate increased significantly in high-risk patients who had at least 1 episode  
48  
49  
50  
51  
52  
53  
54  
55  
56  
57  
58  
59  
60

1  
2  
3  
4 of bacterial pulmonary infection during the pre-vaccine period or chronic respiratory  
5 failure; and the mortality rate was higher in vaccinated patients, although the presence  
6 of adverse effects of PPV23 is unlikely because PPV23 had generally been considered  
7 safe based on clinical experience since 1977.[7] In the Cox proportional hazards model,  
8 PPV23 was not a risk factor for the events. All of the participants in this study were  
9 elderly patients with chronic pulmonary disease, and all of them could be categorised  
10 into groups for which PPV23 vaccination is recommended in the United States and  
11 some European countries.[3, 7, 14] In Japan, no vaccine recommendations against  
12 pneumococcal infection are issued by the Japanese Ministry of Health, Labour and  
13 Welfare.[11] Japanese participants need to accept some risks for the public benefit and  
14 not for their own if selected for the unvaccinated group. This condition is different from  
15 that in some developed countries where unvaccinated control subjects in clinical trials  
16 of the PPV23 vaccine could still be protected by previous vaccination and indirect  
17 immunity from other people, including children.[28-30] Pneumococcal infection was  
18 associated with increasing mortality rates, while the beneficial effects of PPV23 without  
19 any severe adverse events were suggested in some previous clinical trials.[1, 8, 15,  
20 31-32] Therefore, we decided to conduct a nonrandomised clinical study to ensure that  
21 participants were treated with respect and dignity.

22  
23  
24  
25  
26  
27  
28  
29  
30  
31  
32  
33  
34  
35  
36  
37  
38  
39  
40  
41 The doctors had access to the patients' vaccination record during the observation  
42 period. However, at the time of this study, PPV23 had already been approved by the  
43 Japanese Ministry of Health, Labour and Welfare, and there were no conflicts of interest  
44 with pharmaceutical companies. All the treatments were supported by the public health  
45 care system funded by the Japanese government; no specific grants were provided from  
46 any funding agencies. Diagnosis of pulmonary infection was made according to the  
47  
48  
49  
50  
51  
52  
53  
54  
55  
56  
57  
58  
59  
60

1  
2  
3  
4 same diagnostic criteria. Therefore it is unlikely that treatment bias occurred during the  
5  
6 observation period.  
7

8  
9 The diagnosis of pneumococcal disease was not made in the majority of patients  
10 who had pulmonary infections during the observation period. Identification of *S.*  
11 *pneumoniae* using a sputum Gram stain is required for definitive diagnosis. However,  
12 compared to IPD defined as any condition in which *S. pneumonia* is identified in a  
13 normally sterile body site, microbiological diagnosis in the lower respiratory tract is  
14 ambiguous.[1, 5] It was noted by many authors that respiratory secretion samples for  
15 pneumococcal identification might be unreliable due to the technical difficulties in  
16 obtaining good-quality sputum and in distinguishing causative specimens from  
17 colonisation.[21] The positive results in urine antigen testing might be related to  
18 previous infection or colonisation.[33] It might be difficult to assess PPV23  
19 effectiveness on pneumococcal pulmonary infection using these procedures. Blood  
20 cultures are recommended for patients hospitalised after a diagnosis of  
21 community-acquired pneumonia, although its cost-effectiveness has been questioned in  
22 several studies.[34] Less expensive, novel techniques for accurate diagnosis of  
23 pneumonia need to be developed.  
24  
25  
26  
27  
28  
29  
30  
31  
32  
33  
34  
35  
36  
37  
38  
39

#### 40 **Conclusions and policy implications**

41  
42 Our data demonstrated that the beneficial effects of the PPV23 vaccination may not be  
43 obtainable if an episode of pulmonary infection occurred during the pre-vaccine period  
44 in elderly patients with chronic pulmonary disease. We suggest that PPV23 needs to be  
45 given soon after chronic pulmonary disease is diagnosed. In developed countries,  
46 including Japan, elderly populations with chronic pulmonary disease are growing in  
47  
48  
49  
50  
51  
52  
53  
54  
55  
56  
57  
58  
59  
60



1  
2  
3  
4 number. The Japanese Ministry of Health, Labour and Welfare should introduce the  
5  
6 PPV23 vaccination for patients with chronic pulmonary disease and in routine  
7  
8 vaccination of children along with pneumococcal conjugate vaccine that could provide  
9  
10 indirect beneficial effects to the population in whom PPV23 efficacy may not be  
11  
12 expected.  
13  
14  
15  
16  
17  
18  
19  
20  
21  
22  
23  
24  
25  
26  
27  
28  
29  
30  
31  
32  
33  
34  
35  
36  
37  
38  
39  
40  
41  
42  
43  
44  
45  
46  
47  
48  
49  
50  
51  
52  
53  
54  
55  
56  
57  
58  
59  
60

For peer review only

**Table 1: Baseline characteristics of 1378 outpatients with chronic pulmonary disease**

|                              | Frequency of pulmonary infection during the pre-vaccine period |                |                | P Value† |
|------------------------------|----------------------------------------------------------------|----------------|----------------|----------|
|                              | 0<br>(n = 1164)                                                | 1<br>(n = 167) | >1<br>(n = 43) |          |
| Age                          |                                                                |                |                |          |
| Mean ± SD                    | 71.3 ± 7.0                                                     | 73.3 ± 6.9     | 73.0 ± 7.0     | < 0.001  |
| Median                       | 71                                                             | 73             | 73             |          |
| Male                         | 626 (53.8%)                                                    | 98 (58.7%)     | 27 (62.8%)     | 0.272    |
| Female                       | 538 (46.2%)                                                    | 69 (41.3%)     | 16 (37.2%)     |          |
| Chronic respiratory disease* |                                                                |                |                |          |
| Bronchial asthma             | 517                                                            | 59             | 16             |          |
| Chronic pulmonary emphysema  | 197                                                            | 40             | 14             |          |
| Old tuberculosis             | 157                                                            | 33             | 10             |          |
| Chronic bronchitis           | 106                                                            | 18             | 5              |          |
| Interstitial pneumonia       | 100                                                            | 9              | 0              |          |
| Non-tuberculous mycobacteria | 84                                                             | 10             | 2              |          |
| Bronchioectasis              | 31                                                             | 13             | 5              |          |
| Others                       | 103                                                            | 15             | 4              |          |
| PPV23-vaccinated             | 512 (44.0%)                                                    | 109 (65.3%)    | 25 (58.1%)     | < 0.001  |
| PPV23-unvaccinated           | 652 (56.0%)                                                    | 58 (34.7%)     | 18 (41.9%)     |          |
| Chronic respiratory failure  |                                                                |                |                |          |
| +                            | 70 (6.0%)                                                      | 20 (12.0%)     | 7 (16.3%)      | < 0.001  |
| -                            | 1094 (94.0%)                                                   | 147 (88.0%)    | 36 (83.7%)     |          |

\*Some patients were diagnosed as having more than one chronic respiratory disease.

†Data was analyzed using the Wilcoxon test or the Pearson's test.

**Table 2: The effects of pulmonary infection during the pre-vaccine period and chronic respiratory failure on pulmonary infection-free survival after PPV23 vaccination**

| Frequency of pulmonary infection during the pre-vaccine period | Chronic respiratory failure | N    | event* | Pulmonary infection-free survival at the end of the study* | 95% CI        | P value† |
|----------------------------------------------------------------|-----------------------------|------|--------|------------------------------------------------------------|---------------|----------|
| 0                                                              | (-)                         | 1094 | 154    | 0.840                                                      | 0.816 – 0.864 | <0.001   |
| 0                                                              | (+)                         | 70   | 19     | 0.653                                                      | 0.525 – 0.781 |          |
| 1                                                              | (-)                         | 147  | 59     | 0.550                                                      | 0.462 – 0.638 | 0.506    |
| 1                                                              | (+)                         | 20   | 10     | 0.409                                                      | 0.168 – 0.649 |          |
| >1                                                             | (-)                         | 36   | 25     | 0.315                                                      | 0.161 – 0.469 | 0.348    |
| >1                                                             | (+)                         | 7    | 6      | 0.143                                                      | 0.000 – 0.402 |          |

\*Event represented the number of patients who were diagnosed with pulmonary infection during the observation period.

†Data was analyzed using the log-rank test.

1  
2  
3  
4  
5  
6  
7  
8  
9  
10  
11  
12  
13  
14  
15  
16  
17  
18  
19  
20  
21  
22  
23  
24  
25  
26  
27  
28  
29  
30  
31  
32  
33  
34  
35  
36  
37  
38  
39  
40  
41  
42  
43  
44  
45  
46  
47

For peer review only

1  
2  
3  
4  
5  
6  
7  
8  
9  
10  
11  
12  
13  
14  
15  
16  
17  
18  
19  
20  
21  
22  
23  
24  
25  
26  
27  
28  
29  
30  
31  
32  
33  
34  
35  
36  
37  
38  
39  
40  
41  
42  
43  
44  
45  
46  
47

**Table 3: Association of the frequency of pulmonary infection during the pre-vaccine period, chronic respiratory failure, PPV23, gender and age with the first episode of pulmonary infection or death of any cause**

|                                                                            | Hazard ratio | 95% CI        | P Value |
|----------------------------------------------------------------------------|--------------|---------------|---------|
| <b>Covariates for the risk of the first episode of pulmonary infection</b> |              |               |         |
| <b>Pulmonary infection during the pre-vaccine period</b>                   |              |               |         |
| 1 episode                                                                  | 3.251*       | 2.436 – 4.338 | <0.001  |
| >1 episode                                                                 | 6.480*       | 4.380 – 9.589 | <0.001  |
| <b>Chronic respiratory failure</b>                                         | 1.767        | 1.227 – 2.546 | 0.002   |
| <b>PPV23 vaccination</b>                                                   | 1.096        | 0.848 – 1.416 | 0.396   |
| <b>Gender</b>                                                              | 0.911        | 0.712 – 1.166 | 0.457   |
| <b>Age</b>                                                                 | 0.994        | 0.976 – 1.013 | 0.553   |
| <b>Covariates for the risk of death of any cause</b>                       |              |               |         |
| <b>Pulmonary infection during the pre-vaccine period</b>                   |              |               |         |
| 1 episode                                                                  | 2.289*       | 1.380 – 3.797 | 0.001   |
| >1 episode                                                                 | 3.134*       | 1.486 – 6.612 | 0.003   |
| <b>Chronic respiratory failure</b>                                         | 2.152        | 1.234 – 3.752 | 0.007   |
| <b>PPV23 vaccination</b>                                                   | 0.795        | 0.499 – 1.264 | 0.332   |
| <b>Gender</b>                                                              | 0.340        | 0.199 – 0.580 | <0.001  |
| <b>Age</b>                                                                 | 1.040        | 1.008 – 1.072 | 0.014   |

\*Hazard ratio was estimated in relative to the case of outpatients with no episode of pulmonary infection during the pre-vaccine period.

**Table 4: The influence of pulmonary infection during the pre-vaccine period and chronic respiratory failure on the PPV23 vaccine efficacy**

| Frequency of pulmonary infection during the pre-vaccine period | Chronic respiratory failure | Vaccinated* | Unvaccinated* | P Value† |
|----------------------------------------------------------------|-----------------------------|-------------|---------------|----------|
| (-)                                                            | (-)                         | 0.846 (465) | 0.836 (629)   | 0.931    |
|                                                                | (+)                         | 0.755 (47)  | 0.450 (23)    | 0.019    |
| <b>1 episode</b>                                               | (-)                         | 0.557 (92)  | 0.490 (55)    | 0.665    |
|                                                                | (+)                         | 0.431 (17)  | 0.333 (3)     | 0.876    |
| <b>&gt;1 episode</b>                                           | (-)                         | 0.317 (22)  | 0.214 (13)    | 0.200    |
|                                                                | (+)                         | 0.000 (3)   | 0.250 (4)     | 0.093    |

\*Data represented the pulmonary infection-free survival (%) at the end of the study (2 years after PPV23 vaccination). Numbers in parenthesis indicate numbers of patients.

†Data was analyzed using the log-rank test.

1  
2  
3  
4  
5  
6  
7  
8  
9  
10  
11  
12  
13  
14  
15  
16  
17  
18  
19  
20  
21  
22  
23  
24  
25  
26  
27  
28  
29  
30  
31  
32  
33  
34  
35  
36  
37  
38  
39  
40  
41  
42  
43  
44  
45  
46  
47

For peer review only

1  
2  
3  
4 **Contributions:** SI was responsible for interpretation of the data, and drafted the  
5 manuscript. YW was responsible for study design, collection and interpretation of the  
6 data. YW also revised the drafted manuscript. Dr. Tetsuji Kaneko (TK) and Dr. Satoshi  
7 Morita (SM) provided statistical support including analysis of the data and training in  
8 the use of statistical software. TK and SM also drafted the statistical analysis part in the  
9 manuscript and revised the drafted manuscript. TS, NM, Dr. Takeshi Kaneko and YI  
10 helped interpreting the findings and contributed to critical revision of the drafted  
11 manuscript, particularly regarding pulmonary infection issues. YN and Dr. Shunsaku  
12 Mizushima helped interpreting the data, provided very useful suggestion regarding  
13 immunization and public health policy, and revised the drafted manuscript. All authors  
14 approved the final version of the manuscript.

15  
16  
17  
18  
19  
20  
21  
22  
23  
24  
25  
26 **Funding:** This research received no specific grants from any funding agencies in the  
27 public, commercial or not-for-profit sectors.

Deleted: ¶

28  
29  
30 **Competing interests:** None declared.

31  
32 **Ethical approval:** Full approval of Institutional Review Board in the Kanagawa  
33 Cardiovascular and Respiratory Diseases Centre was obtained prior to the study  
34 initiation.  
35  
36

37  
38 **Data sharing:** No additional data available.

#### 39 40 **Acknowledgement**

41  
42 The material (clinical data) that had been used for ref. 14 is modified and printed with  
43 the permission of the ©European Respiratory Society.  
44  
45  
46

#### 47 48 **Copyright license statement**

49  
50 The Corresponding Author has the right to grant on behalf of all authors and does grant  
51  
52



1  
2  
3  
4 on behalf of all authors, an exclusive license (or non-exclusive for UK Crown  
5 Employees) on a worldwide basis to the BMJ Publishing Group Ltd, and its Licensees  
6 to permit this article (if accepted) to be published in BMJ Open and any other BMJPG  
7 products and to exploit all subsidiary rights, as set out in our license.”  
8  
9  
10  
11  
12  
13  
14  
15

## 16 References

- 17  
18 1 Moberley S, Holden J, Tantham DP, et al. Vaccines for preventing pneumococcal  
19 infection in adults. *Cochrane Database (Review)* 2008 (1):CD000422.  
20  
21  
22 2 Heather E, Hsu MPH, Kathleen A, et al. Effects of pneumococcal conjugate vaccine  
23 on pneumococcal meningitis. *N Engl J Med* 2009;360:244-56.  
24  
25  
26 3 CDC. Updated recommendations for prevention of invasive pneumococcal disease  
27 among adults using the 23-valent pneumococcal polysaccharide vaccine (PPSV23).  
28  
29  
30 *Morb Mortal Wkly Rep* 2010;59:34.  
31  
32 4 Vila-Corcoles A, Ochoa-Gondar O, Guzman JA, et al. Effectiveness of the 23-valent  
33 pneumococcal polysaccharide vaccine against invasive pneumococcal disease in people  
34 60 years or older. *BMC Infect Dis* 2010;10:73.  
35  
36  
37 5 World Health Organization. 23-valent pneumococcal polysaccharide vaccine WHO  
38 position paper. *Wkly Epidemiol Rep* 2008;83:373-84.  
39  
40  
41  
42 6 Smith FE, Mann JM. Pneumococcal pneumonia: Experience in a community  
43 hospital. *West J Med* 1982;136:1-5.  
44  
45  
46 7 CDC. Prevention of pneumococcal disease: recommendations of the advisory  
47 committee on immunization practices (ACIP). *Wkly Epidemiol Rep* 1997;46:RR-8.  
48  
49  
50 8 Jackson LA, Neuzil KM, Yu O, et al. Effectiveness  
51  
52  
53  
54  
55  
56  
57  
58  
59  
60

1  
2  
3  
4 of pneumococcal polysaccharide vaccine in older adults. *N Engl J Med*

5  
6 2003;348:1747-55.

7  
8 9 Andrews R, Moberley SA. The controversy of the efficacy of pneumococcal vaccine.

10  
11 *Can Med Assoc J* 2009;180:18-19.

12  
13 10 Fine MJ, Smith MA, Carson CA, et al. Efficacy of pneumococcal vaccination in

14  
15 adults. *Arch Intern Med* 1994;154:2666-77.

16  
17 11 Maruyama T, Taguchi O, Niederman MS, et al. Efficacy of 23-valent pneumococcal

18  
19 vaccine in preventing pneumonia and improving survival in nursing home residents:

20  
21 double-blind, randomized and placebo controlled trial. *BMJ* 2010;340:c1004.

22  
23 12 Pedersen RH, Lohse N, Ostergaard L, et al. The effectiveness of pneumococcal

24  
25 polysaccharide vaccination in HIV-infected adults: a systematic review. *HIV*

26  
27 Med:DOI:10.1111/j.1468-1293.2010.00892.x.

28  
29 13 Nichol KL, Backen L, Wuorenma J, et al. The health and economic benefits

30  
31 associated with pneumococcal vaccination of elderly persons with chronic lung disease.

32  
33 *Arch Intern Med* 1999;159:2437-42.

34  
35 14 Huss A, Scott P, Stuck AE, et al. Efficacy of pneumococcal vaccination in adults:

36  
37 meta-analysis. *Can Med Assoc J* 2009;180:48-58.

38  
39 15 Moore RA, Wiffen PJ, Lipsky BA. Are the pneumococcal polysaccharide vaccines

40  
41 effective? Meta-analysis of the prospective trials. *BMC Fam Pract* 2000;1:1.

42  
43 16 Watanuki Y, Miyazawa N, Kudo M, et al. Effects of pneumococcal vaccine in

44  
45 patients with chronic respiratory disease. *Eur Respir Rev* 2008;17:43-5.

46  
47 17 Molinos L, Clemente MG, Miranda B, et al. Community-acquired pneumonia in

48  
49 patients with and without chronic obstructive pulmonary disease. *J Infec*

50  
51 2009;58:417-24.

- 1  
2  
3  
4 18 Ortqvist A, Hedlund J, Burman LA, et al. Randomised trial of 23-valent  
5 pneumococcal capsular polysaccharide vaccine in prevention of pneumonia in  
6 middle-aged and elderly people. *Lancet* 1998;351:399-403.  
7  
8  
9  
10 19 Leech JA, Gervais A, Ruben FL. Efficacy of pneumococcal vaccine in severe  
11 chronic obstructive pulmonary disease. *Can Med Assoc J* 1987;136:361-5.  
12  
13  
14 20 Davis AL, Aranda CP, Schiffman G, et al. Pneumococcal infection and immunologic  
15 response to pneumococcal vaccine in chronic obstructive pulmonary disease. *Chest*  
16 1987;92:204-12.  
17  
18  
19  
20 21 Williams JH, Moser KM. Pneumococcal vaccine and patients with chronic lung  
21 disease. *Ann Intern Med* 1986;104:106-9.  
22  
23  
24 22 Lee TA, Weaver FM, Weiss KB. Impact of pneumococcal vaccination on pneumonia  
25 rates in patients with COPD and asthma. *J Gen Intern Med* 2007;22:62-7.  
26  
27  
28 23 Alfageme I, Vazquez R, Reyes N, et al. Clinical efficacy of anti-pneumococcal  
29 vaccination in patients with COPD. *Thorax* 2006;61:189-95.  
30  
31  
32 24 Cabello H, Torres A, Ceils R, et al. Bacterial colonization of distal airways in healthy  
33 subjects and chronic lung disease: a bronchoscopic study. *Eur Respir J*  
34 1997;10:1137-44.  
35  
36  
37  
38 25 Rees PJ. Review: inhaled corticosteroid do not reduce mortality but increase  
39 pneumonia in COPD. *Evid Based Med* 2009;14:9.  
40  
41  
42 26 Welte T. Inhaled corticosteroids in COPD and the risk of pneumonia. *Lancet*  
43 2009;374:668-70.  
44  
45  
46 27 Almirall J, Bolibar I, Serra-Prat M, et al. New evidence of risk factors for  
47 community-acquired pneumonia: a population-based study. *Eur Respir J*  
48 2008;31:1274-84.  
49  
50  
51  
52  
53  
54  
55  
56  
57  
58  
59  
60

- 1  
2  
3  
4 28 Lexau CA, Lynfield R, Danila R. Changing epidemiology of invasive pneumococcal  
5 disease among older adults in the era of pediatric pneumococcal conjugate vaccine.  
6  
7  
8 *JAMA* 2005;294:2043-51.  
9
- 10 29 Smith KJ, Zimmerman RK, Lin CJ, et al. Alternative strategies for adult  
11 pneumococcal polysaccharide vaccination: A cost-effectiveness analysis. *Vaccine*  
12  
13 2008;26:1420-31.  
14
- 15 30 Musher DM. Pneumococcal vaccine - Direct and indirect (herd) effects. *N Engl J*  
16  
17 *Med* 2006;354:1522-4.  
18
- 19 31 Andrews A, Nadjim B, Gant V, et al. Community-acquired pneumonia. *Curr Opin*  
20  
21 *Pulm Med* 2003;9:175-80.  
22
- 23 32 Fine MJ, Auble TE, Yealy DM, et al. A prediction rule to indentify low-risk patients  
24  
25 with community-acquired pneumonia. *N Engl J Med* 1997;336:243-50.  
26
- 27 33 Andreo F, Ruiz-Manzano J, Prat C, et al. Utility of pneumococcal urinary antigen  
28  
29 detection in diagnosing exacerbations in COPD patients. *Respir Med*  
30  
31 2010;104:397-403.  
32
- 33 34 Waterer GW, Jennings G, Wunderink RG. The impact of blood cultures on antibiotic  
34  
35 therapy in pneumococcal pneumonia. *Chest* 1999;116:1278-81.  
36  
37  
38  
39  
40  
41  
42  
43  
44  
45  
46  
47  
48  
49  
50  
51  
52  
53  
54  
55  
56  
57  
58  
59  
60

Figure 1

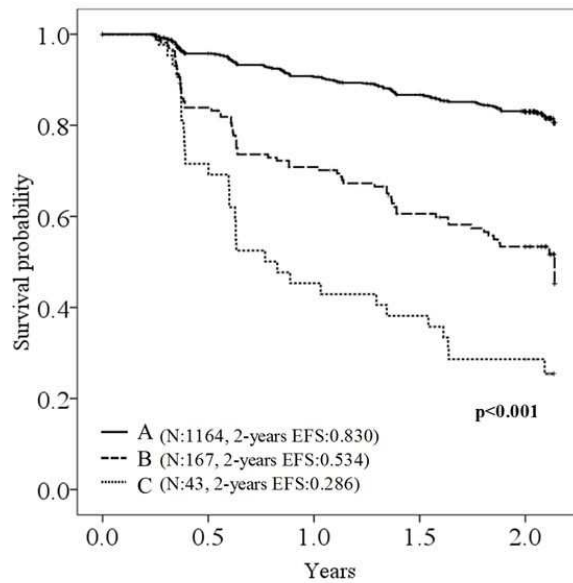

\*EFS: event free survival, event: pulmonary infection

Kaplan-Meier curves showing the proportion of patients free of the first episode of pulmonary infection during the observation period  
Frequency of pulmonary infection during the pre-vaccine period: zero episodes, A; one episode, B; more than 1 episode, C

81x60mm (300 x 300 DPI)

1  
2  
3  
4  
5  
6  
7  
8  
9  
10  
11  
12  
13  
14  
15  
16  
17  
18  
19  
20  
21  
22  
23  
24  
25  
26  
27  
28  
29  
30  
31  
32  
33  
34  
35  
36  
37  
38  
39  
40  
41  
42  
43  
44  
45  
46  
47  
48  
49  
50  
51  
52  
53  
54  
55  
56  
57  
58  
59  
60

Figure 2

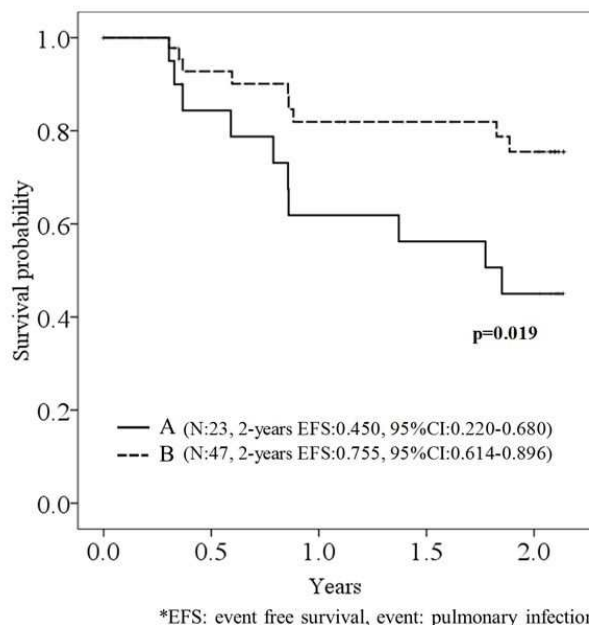

Kaplan-Meier curves showing the proportion of patients free of the first episode of pulmonary infection during the observation period  
 Patients with chronic respiratory failure who had 0 episodes of pulmonary infection during the pre-vaccine period: unvaccinated, A; vaccinated, B

81x60mm (300 x 300 DPI)

only

Figure A

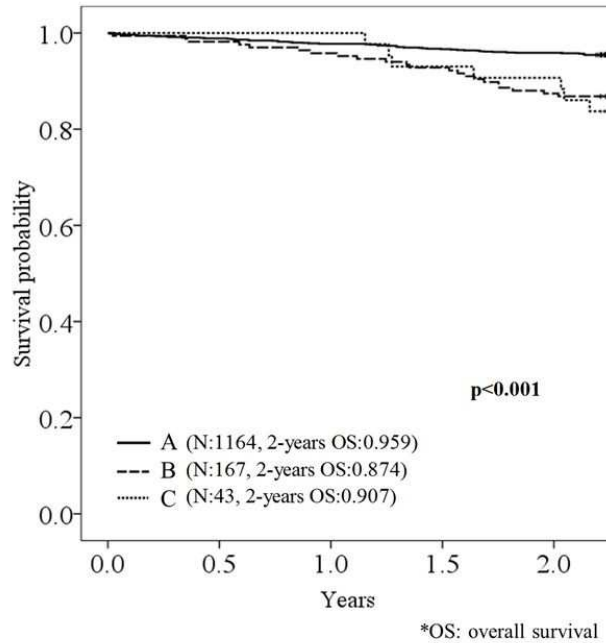

Kaplan-Meier curves showing the proportion of patients free of death during the observation period  
Frequency of pulmonary infection during the pre-vaccine period: 0 episodes, A; one episode, B;  
more than one episode, C

81x60mm (300 x 300 DPI)

Figure B

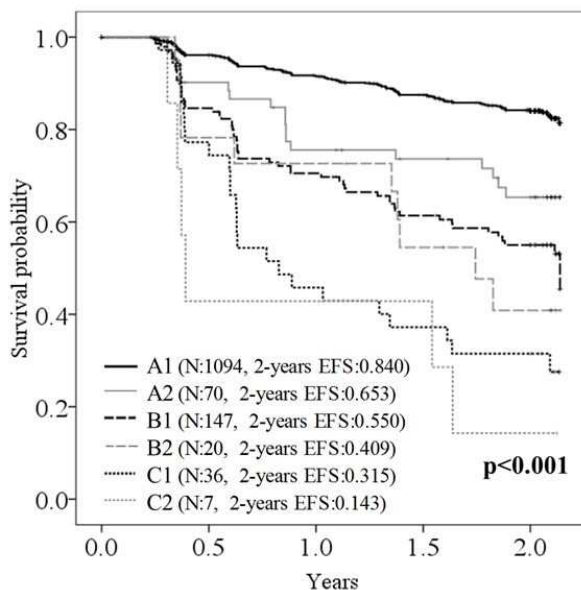

\*EFS: event-free survival, event: pulmonary infection

Kaplan-Meier curves showing the proportion of patients free of the first episode of pulmonary infection during the observation period

Zero episodes of pulmonary infection during the pre-vaccine period: without chronic respiratory failure, A1; with chronic respiratory failure, A2

One episode of pulmonary infection during the pre-vaccine period: without chronic respiratory failure, B1; with chronic respiratory failure, B2

More than 1 episode of pulmonary infection during the pre-vaccine period without chronic respiratory failure, C1; with chronic respiratory failure, C2

81x60mm (300 x 300 DPI)

only



Figure C

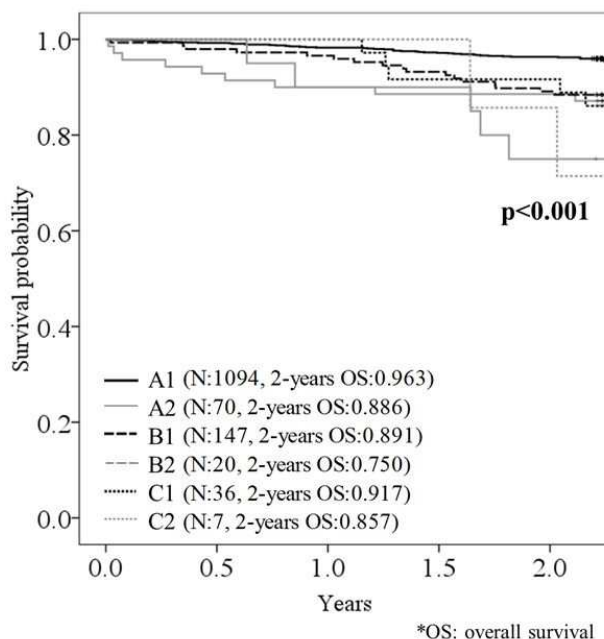

Kaplan-Meier curves showing the proportion of patients free of death during the observation period

Zero episodes of pulmonary infection during the pre-vaccine period: without chronic respiratory failure, A1; with chronic respiratory failure, A2

One episode of pulmonary infection during the pre-vaccine period: without chronic respiratory failure, B1; with chronic respiratory failure, B2

More than 1 episode of pulmonary infection during the pre-vaccine period: without chronic respiratory failure, C1; with chronic respiratory failure, C2

81x60mm (300 x 300 DPI)

Figure D

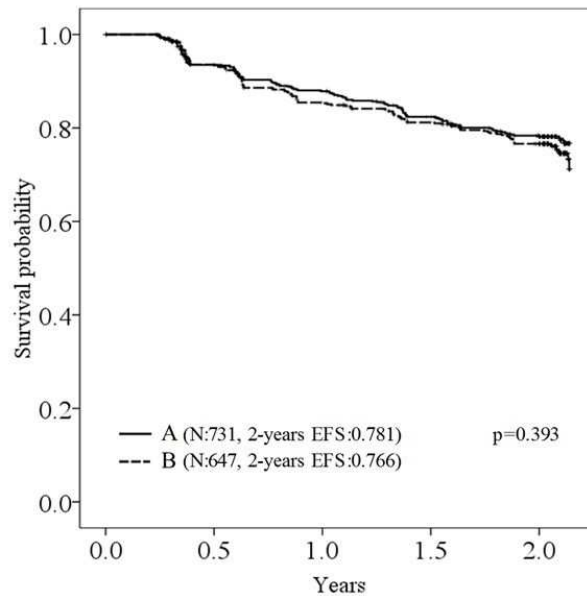

\*EFS: event-free survival, event: pulmonary infection

Kaplan-Meier curves showing the proportion of patients free of the first episode of pulmonary infection during the observation period

All the participants: unvaccinated, A; vaccinated, B

81x60mm (300 x 300 DPI)

1  
2  
3  
4  
5  
6  
7  
8  
9  
10  
11  
12  
13  
14  
15  
16  
17  
18  
19  
20  
21  
22  
23  
24  
25  
26  
27  
28  
29  
30  
31  
32  
33  
34  
35  
36  
37  
38  
39  
40  
41  
42  
43  
44  
45  
46  
47  
48  
49  
50  
51  
52  
53  
54  
55  
56  
57  
58  
59  
60

Figure E

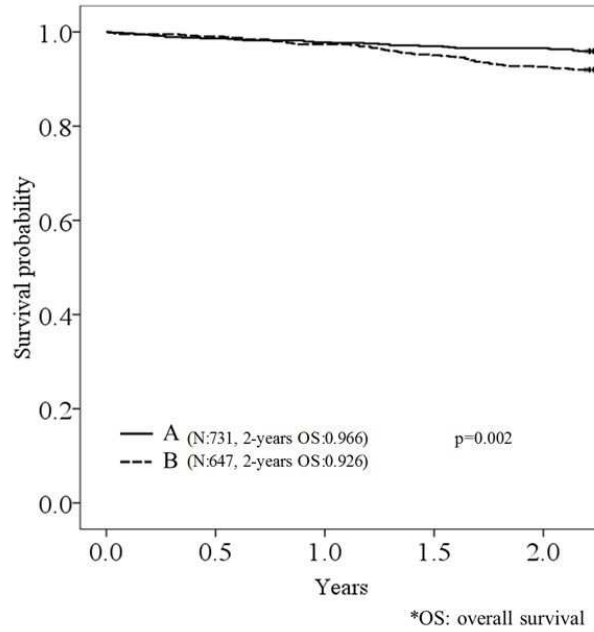

Kaplan-Meier curves showing the proportion of patients free of death during the observation period  
All the participants: unvaccinated, A; vaccinated, B

81x60mm (300 x 300 DPI)

Peer Review Only

1  
2  
3  
4  
5  
6  
7  
8  
9  
10  
11  
12  
13  
14  
15  
16  
17  
18  
19  
20  
21  
22  
23  
24  
25  
26  
27  
28  
29  
30  
31  
32  
33  
34  
35  
36  
37  
38  
39  
40  
41  
42  
43  
44  
45  
46  
47  
48  
49  
50  
51  
52  
53  
54  
55  
56  
57  
58  
59  
60

Figure F

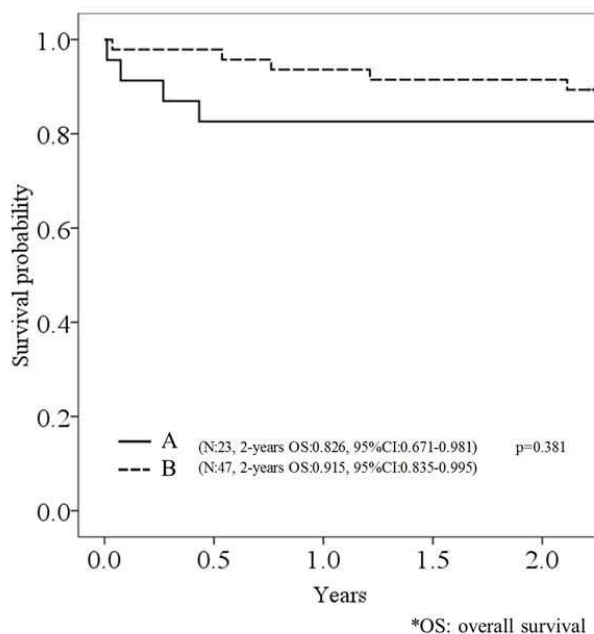

Kaplan-Meier curves showing the proportion of patients free of death during the observation period  
 Patients with chronic respiratory failure who had 0 episodes of pulmonary infection during the pre-  
 vaccine period: unvaccinated, A; vaccinated, B

81x60mm (300 x 300 DPI)

Peer Review Only

Figure G

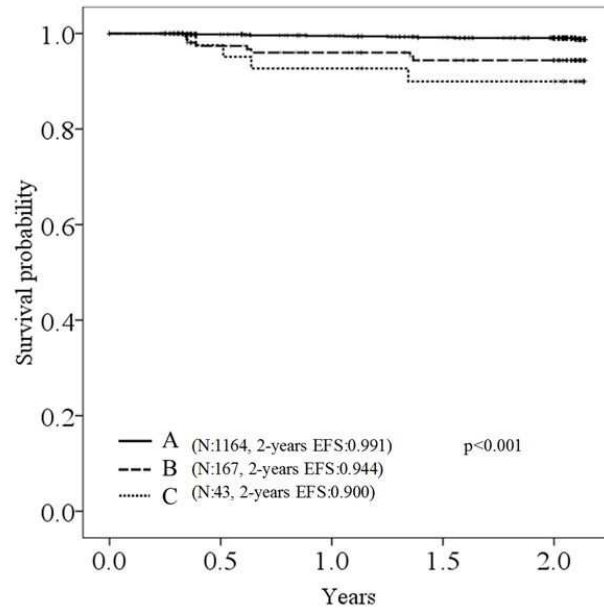

\*EFS: event-free survival, event: pneumococcal pneumonia

Kaplan-Meier curves showing the proportion of patients free of pneumococcal pulmonary infection during the observation period

Frequency of pulmonary infection during the pre-vaccine period: zero episodes, A; one episode, B; more than 1 episode, C

81x60mm (300 x 300 DPI)

1  
2  
3  
4  
5  
6  
7  
8  
9  
10  
11  
12  
13  
14  
15  
16  
17  
18  
19  
20  
21  
22  
23  
24  
25  
26  
27  
28  
29  
30  
31  
32  
33  
34  
35  
36  
37  
38  
39  
40  
41  
42  
43  
44  
45  
46  
47  
48  
49  
50  
51  
52  
53  
54  
55  
56  
57  
58  
59  
60

Figure H

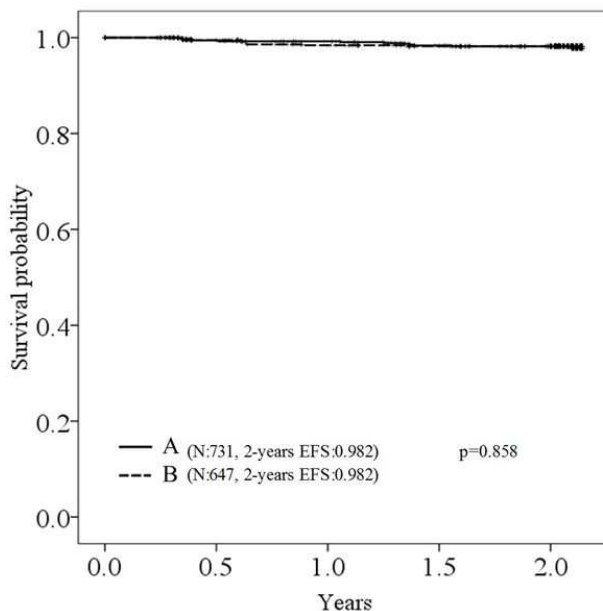

\*EFS: event-free survival, event: pneumococcal pneumonia

Kaplan-Meier curves showing the proportion of patients free of pneumococcal pulmonary infection during the observation period

All the participants: unvaccinated, A; vaccinated, B

81x60mm (300 x 300 DPI)

For peer review only
